# Supplementary material for: Photoinduced three-component alkylpyridination of alkenes via spiro-dihydroquinazolinone fragmentation
Source: Royal Society of Chemistry journal article supplement (doi:10.1039/d5cc06894k), 2026-01-01

## **Photoinduced Three-Component Alkylpyridination of Alkenes via Spiro-Dihydroquinazolinone Fragmentation**

Jia-Yi Li,<sup>a</sup> Hong-Jie Miao,<sup>a,c</sup> Wen-Peng Yang,<sup>a</sup> Xin-Hua Duan<sup>a,b</sup> and Li-Na Guo<sup>a\*</sup>

<sup>a</sup>Department of Chemistry, School of Chemistry, Xi'an Key Laboratory of Sustainable Energy Material Chemistry and Engineering Research Center of Energy Storage Materials and Devices, Ministry of Education, Xi'an Jiao tong University, Xi'an 710049, China.

<sup>b</sup>State Key Laboratory of Natural Product Chemistry, Lanzhou University, Lanzhou 730000, China.

<sup>c</sup>Multifunctional Electronic Ceramics Laboratory, College of Engineering, Xi'an International University, Xi'an 710077, China

\*E-mail: guoln81@xjtu.edu.cn

# Table of Contents

|                                                                                                                                     |     |
|-------------------------------------------------------------------------------------------------------------------------------------|-----|
| 1. General Information                                                                                                              | S3  |
| 2. General Procedure for Synthesis of Dihydroquinazolinones <b>1</b>                                                                | S4  |
| 3. Optimization of Reaction Conditions                                                                                              | S5  |
| 3.1 General Procedure for the Reaction of Spiro-Dihydroquinazolinone <b>1a</b> with Styrene <b>2a</b> and 4-Cyanopyridine <b>3a</b> | S5  |
| 3.2 Optimizations of the Three-Component Reaction Involving <b>1a</b> , <b>2a</b> , and <b>3a</b>                                   | S6  |
| 3.2.1 Optimization of Reaction Conditions in the Absence of a Photocatalyst                                                         | S6  |
| 3.2.2 Optimizing Reaction Conditions with a Photocatalyst                                                                           | S8  |
| 4. Respective Procedure                                                                                                             | S11 |
| 5. Large-Scale Synthesis of <b>4a</b>                                                                                               | S12 |
| 6. Derivatizations of <b>4a</b>                                                                                                     | S13 |
| 6.1 Amination of <b>4a</b> with Benzylamine                                                                                         | S13 |
| 6.2 Reduction of <b>4a</b> with NaBH <sub>4</sub>                                                                                   | S13 |
| 6.3 Two-Component Reaction                                                                                                          | S14 |
| 7. Investigation of the Reaction Mechanism                                                                                          | S16 |
| 7.1 Radical Trapping Reaction with TEMPO                                                                                            | S16 |
| 7.2 Radical Inhibiting Reaction with BHT                                                                                            | S17 |
| 7.3 Radical Clock Experiments                                                                                                       | S17 |
| 7.4 Stern-Volmer Fluorescent Quenching Studies                                                                                      | S18 |
| 7.5 Light on/off Experiments                                                                                                        | S19 |
| 7.6 Mechanistic Validation of the Absence of Photocatalysts                                                                         | S21 |
| 7.6.1 UV-vis Absorption Experiments                                                                                                 | S21 |
| 7.6.2 Emission Quenching Experiments (Stern-Volmer studies)                                                                         | S22 |
| 8. References                                                                                                                       | S24 |
| 9. Characterization Data of Starting Materials                                                                                      | S25 |
| 10. Characterization Data of Products                                                                                               | S27 |
| 11. <sup>1</sup> H NMR and <sup>13</sup> C NMR Spectra of Starting Materials and Products                                           | S42 |

## 1. General Information

Unless otherwise noted, all reactions were carried out under nitrogen atmosphere. Reagents and solvents were purchased from commercial suppliers and were used without further purification. Analytical TLC: aluminum backed plates pre-coated (0.25 mm) with Merck Silica Gel GF-254. Column chromatography purifications were carried out using 200-300 mesh silica gel. Melting points were measured using open glass capillaries in a SGW® X-4A apparatus.  $^1\text{H}$  and  $^{13}\text{C}$  spectra were recorded on a 400 MHz JEOL (100 MHz for  $^{13}\text{C}$  NMR) spectrometer at ambient temperature. Chemical shifts are reported in ppm from TMS with the solvent resonance as internal standard ( $\text{CDCl}_3$ :  $^1\text{H}$  NMR:  $\delta$  7.26;  $^{13}\text{C}$  NMR:  $\delta$  77.0;  $\text{DMSO}-d_6$ :  $^1\text{H}$  NMR:  $\delta$  2.50;  $^{13}\text{C}$  NMR:  $\delta$  39.5). Coupling constants are reported in Hz with multiplicities denoted as s (singlet), d (doublet), t (triplet), q (quartet), dd (doublet of doublets), td (triplet of doublets), m (multiplet) and br (broad). Infrared spectra were recorded on a Bruker V 70 and only major peaks were reported in  $\text{cm}^{-1}$ . HRMS were obtained on a WATERS I-Class VION IMS Q-Tof with an ESI source.

## 2. General Procedure for Synthesis of Dihydroquinazolinones 1

The spiro pre-aromatics **1**<sup>1-6</sup> were prepared according to the literature. The specific experimental steps are as follows:

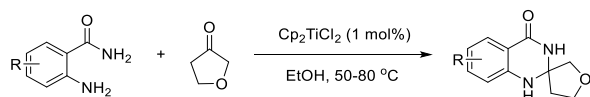

Dihydroquinazolinones **1** were prepared as follows: Under ambient air, a 50 mL oven-dried round-bottom flask equipped with a magnetic stir bar was charged with the corresponding 2-aminobenzamides (10.0 mmol, 1.0 equiv), dihydrofuran-3(2*H*)-one (11.0 mmol, 1.1 equiv), and  $\text{Cp}_2\text{TiCl}_2$  (1 mol%) in EtOH (10 mL). The reaction mixture was stirred at 50–80 °C for 4 h, with monitored by thin-layer chromatography (TLC). Upon cooling to room temperature, the precipitate was collected by suction filtration, washed with water, and purified by recrystallization from ethanol to yield the desired product (**1b-1e**).

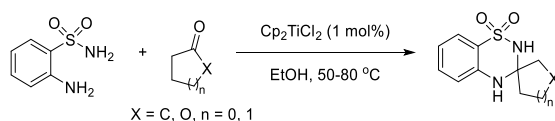

Under ambient air, a 50 mL oven-dried round-bottom flask equipped with a magnetic stir bar was charged with the 2-aminobenzenesulfonamide (5.0 mmol, 1.0 equiv), cyclobutanone or dihydrofuran-3(2*H*)-one (5.5 mmol, 1.1 equiv), and  $\text{Cp}_2\text{TiCl}_2$  (1 mol%) in EtOH (5 mL). The reaction mixture was stirred at 50–80 °C for 4 h, with monitored by thin-layer chromatography (TLC). Upon cooling to room temperature, the precipitate was collected by suction filtration, washed with water, and purified by recrystallization from ethanol to afford the target product (**1l** and **1m**).

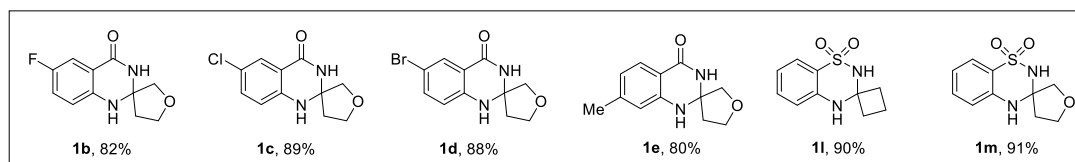

Figure S1. Spiro pre-aromatics **1**



### 3. Optimization of Reaction Conditions

#### 3.1 General Procedure for the Reaction of Spiro-Dihydroquinazolinone **1a** with Styrene **2a** and 4-Cyanopyridine **3a**

To a 10 mL oven-dried Schlenk tube equipped with a magnetic stir bar, spiro dihydroquinazolinone **1a** (0.3 mmol, 1.5 equiv), 4-cyanopyridine **3a** (0.3 mmol, 1.5 equiv), and PC (1 mol% or not) were added. The tube was evacuated and backfilled with nitrogen (3 times). Then, a solution of styrene **2a** (0.2 mmol, 1.0 equiv) in solvent (2.0 mL) was injected by a syringe under a nitrogen atmosphere. The reaction mixture was stirred under irradiation with a 30 W purple LEDs ( $\lambda = 395$  nm, positioned  $\sim 1.0$  cm from the bulb) for the specified time. Upon completion, the mixture was quenched with water and extracted with EtOAc ( $3 \times 10$  mL). The combined organic layer was washed with brine (10 mL), dried over  $\text{Na}_2\text{SO}_4$ , and concentrated under in vacuo. The crude product was purified by flash column chromatography on silica gel (EtOAc eluent), yielding the desired product **4a** as a yellow liquid.

**The Visible-Light Photoredox Catalysis Experimental Setup (photographed by author Li-Na Guo)**

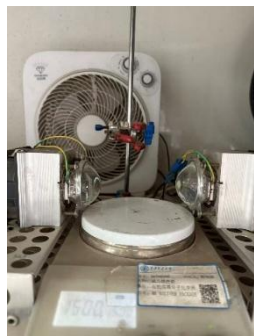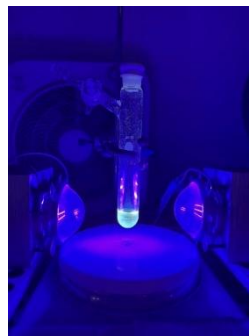

## 3.2 Optimizations of the Three-Component Reaction Involving **1a**, **2a**, and **3a**

### 3.2.1 Optimization of Reaction Conditions in the Absence of a Photocatalyst

#### 1) Screening of Solvents<sup>a</sup>

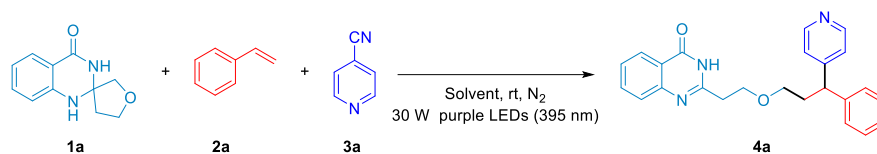

| Entry    | Solvent            | Yield (%) <sup>b</sup> |
|----------|--------------------|------------------------|
| <b>1</b> | <b>DMF</b>         | <b>63</b>              |
| 2        | DMSO               | 58                     |
| 3        | DMAc               | 30                     |
| 4        | NMP                | 52                     |
| 5        | CH <sub>3</sub> CN | Trace                  |
| 6        | Acetone            | Trace                  |
| 7        | MeOH               | Trace                  |
| 8        | DCE                | Trace                  |
| 9        | THF                | Trace                  |
| 10       | Toluene            | Trace                  |

<sup>a</sup>Reaction conditions: **1a** (0.3 mmol, 1.5 equiv.), **2a** (0.2 mmol, 1.0 equiv.), **3a** (0.3 mmol, 1.5 equiv.) in Solvent (2.0 mL) with 30 W purple LEDs irradiation at room temperature for 18 h under N<sub>2</sub>. <sup>b</sup>Yield of isolated product.

#### 2) Screening of Light Sources<sup>a</sup>

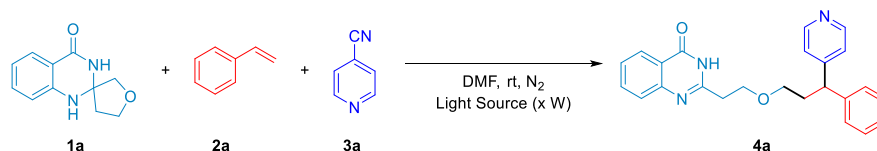

| Entry    | Light Source                     | Yield (%) <sup>b</sup> |
|----------|----------------------------------|------------------------|
| <b>1</b> | <b>30 W purple LEDs (395 nm)</b> | <b>63</b>              |
| 2        | 30 W blue LEDs (465 nm)          | Trace                  |
| 3        | 30 W blue LEDs (425 nm)          | Trace                  |
| 4        | 10 W blue LEDs (440 nm)          | Trace                  |
| 5        | 10 W blue LEDs (420 nm)          | Trace                  |
| 6        | 30 W White LEDs                  | Trace                  |

<sup>a</sup>Reaction conditions: **1a** (0.3 mmol, 1.5 equiv.), **2a** (0.2 mmol, 1.0 equiv.), and **3a** (0.3 mmol, 1.5 equiv.) in DMF (2.0 mL) with x W LEDs irradiation at room temperature for 18 h under N<sub>2</sub>. <sup>b</sup>Yield of isolated product.

### 3) Screening of Ratios of **1a:2a:3a**<sup>a</sup>

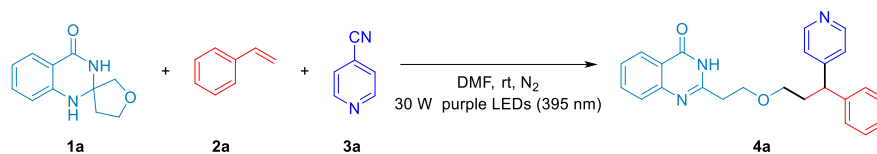

| Entry    | <b>1a:2a:3a</b>  | Yield (%) <sup>b</sup> |
|----------|------------------|------------------------|
| 1        | 1:1.5:1.5        | 38                     |
| 2        | 1:1.5:2          | 42                     |
| 3        | 1:2:2            | 40                     |
| 4        | 1:1:1            | 31                     |
| <b>5</b> | <b>1.5:1:1.5</b> | <b>63</b>              |
| 6        | 1.5:1.5:1        | 52                     |

<sup>a</sup>Reaction conditions: **1a:2a:3a** = x in DMF (2.0 mL) with 30 W purple LEDs irradiation at room temperature for 18 h under N<sub>2</sub>. <sup>b</sup>Yield of isolated product.

### 4) Screening of Times<sup>a</sup>

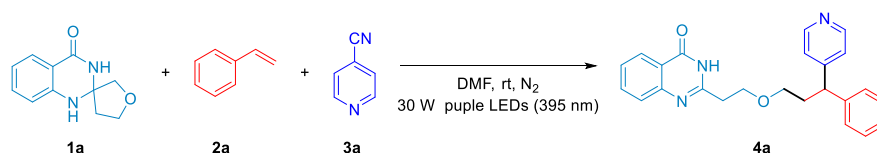

| Entry    | Time (h)  | Yield (%) <sup>b</sup> |
|----------|-----------|------------------------|
| 1        | 12        | 49                     |
| 2        | 18        | 63                     |
| 3        | 24        | 66                     |
| <b>4</b> | <b>28</b> | <b>71</b>              |
| 5        | 32        | 70                     |

<sup>a</sup>Reaction conditions: **1a** (0.3 mmol, 1.5 equiv.), **2a** (0.2 mmol, 1.0 equiv.), and **3a** (0.3 mmol, 1.5 equiv.) in DMF (2.0 mL) with 30 W purple LEDs irradiation at room temperature under N<sub>2</sub>. <sup>b</sup>Yield of isolated product.

## 5) Screening of Additives<sup>a</sup>

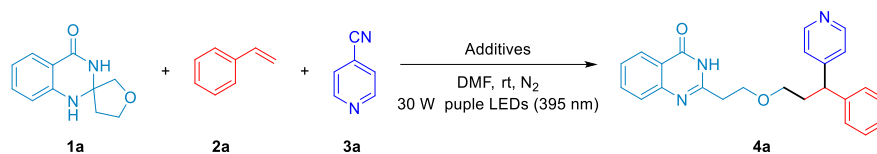

| Entry | Add Other Additives             | Yield (%) <sup>c</sup> |
|-------|---------------------------------|------------------------|
| 1     | None                            | 71(49) <sup>b</sup>    |
| 2     | Na <sub>2</sub> CO <sub>3</sub> | 55                     |
| 3     | NaHCO <sub>3</sub>              | 57                     |
| 4     | K <sub>2</sub> CO <sub>3</sub>  | 54                     |
| 5     | KHCO <sub>3</sub>               | 59                     |
| 6     | Et <sub>3</sub> N               | Trace                  |
| 7     | <b>4CzIPN (1 mol%)</b>          | <b>83</b>              |

<sup>a</sup>Reaction conditions: **1a** (0.3 mmol, 1.5 equiv.), **2a** (0.2 mmol, 1.0 equiv.), and **3a** (0.3 mmol, 1.5 equiv.) and additives in DMF (2.0 mL) with 30 W purple LEDs irradiation at room temperature for 28 h under N<sub>2</sub>. <sup>b</sup>Dry DMF was used. <sup>c</sup>Yield of isolated product.

## 3.2.2 Optimizing Reaction Conditions with a Photocatalyst

### 1) Screening of Light Sources<sup>a</sup>

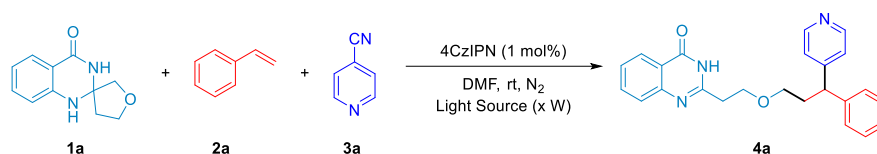

| Entry    | Light Source                     | Yield (%) <sup>b</sup> |
|----------|----------------------------------|------------------------|
| <b>1</b> | <b>30 W purple LEDs (395 nm)</b> | <b>83</b>              |
| 2        | 20 W purple LEDs (395 nm)        | 48                     |
| 3        | 10 W purple LEDs (395 nm)        | Trace                  |
| 4        | 30 W blue LEDs (465 nm)          | 65                     |
| 5        | 20 W blue LEDs (465 nm)          | 75                     |
| 6        | 10 W blue LEDs (465 nm)          | 60                     |
| 7        | 10 W blue LEDs (440 nm)          | Trace                  |
| 8        | 10 W blue LEDs (420 nm)          | Trace                  |
| 9        | 10 W blue LEDs (400 nm)          | 70                     |

<sup>a</sup>Reaction conditions: **1a** (0.3 mmol, 1.5 equiv.), **2a** (0.2 mmol, 1.0 equiv.), **3a** (0.3 mmol, 1.5 equiv.) and 4CzIPN (1 mol%) in DMF (2.0 mL) with x W LEDs irradiation at room temperature for 28 h under N<sub>2</sub>. <sup>b</sup>Yield of isolated product.

## 2) Screening of Photocatalysts<sup>a</sup>

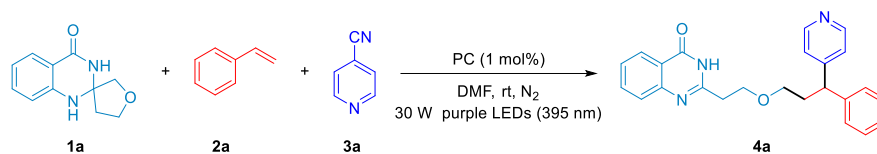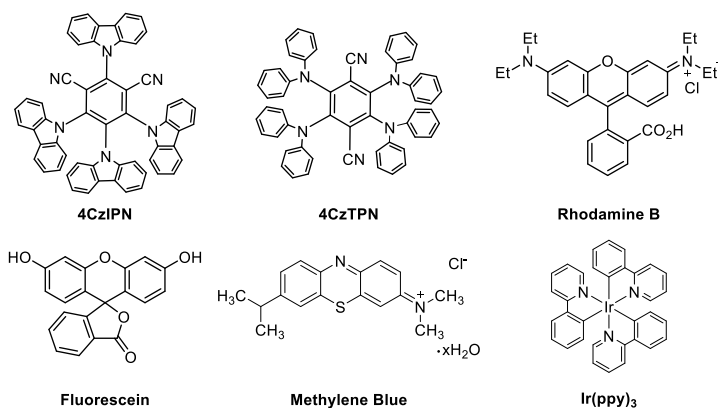

| Entry    | Photocatalyst (PC)   | Yield (%) <sup>b</sup> |
|----------|----------------------|------------------------|
| <b>1</b> | <b>4CzIPN</b>        | <b>83</b>              |
| 2        | 4CzTPN               | 75                     |
| 3        | Rhodamine B          | Trace                  |
| 4        | Fluorescein          | 63                     |
| 5        | TXT                  | 27                     |
| 6        | Methylene Blue       | 44                     |
| 7        | Ir(ppy) <sub>3</sub> | 20                     |

<sup>a</sup>Reaction conditions: **1a** (0.3 mmol, 1.5 equiv.), **2a** (0.2 mmol, 1.0 equiv.), **3a** (0.3 mmol, 1.5 equiv.) and PC (1 mol%) in DMF (2.0 mL) with 30 W purple LEDs irradiation at room temperature for 28 h under N<sub>2</sub>. <sup>b</sup>Yield of isolated product.

## 3) Screening of Amount of 4CzIPN<sup>a</sup>

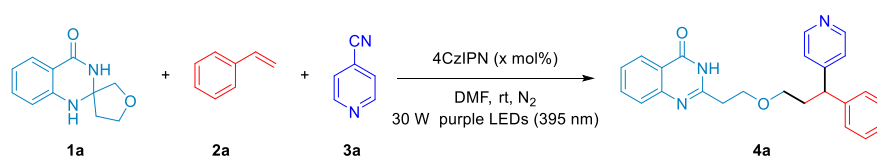

| Entry    | 4CzIPN (x mol%) | Yield (%) <sup>b</sup> |
|----------|-----------------|------------------------|
| 1        | 0.5             | 75                     |
| <b>2</b> | <b>1</b>        | <b>83</b>              |
| 3        | 2               | 80                     |
| 4        | 3               | 72                     |

<sup>a</sup>Reaction conditions: **1a** (0.3 mmol, 1.5 equiv.), **2a** (0.2 mmol, 1.0 equiv.), **3a** (0.3 mmol, 1.5 equiv.) and 4CzIPN (x mol%) in DMF (2.0 mL) with 30 W purple LEDs irradiation at room temperature for 28 h under N<sub>2</sub>. <sup>b</sup>Yield of isolated product.

#### 4) Screening of Solvents<sup>a</sup>

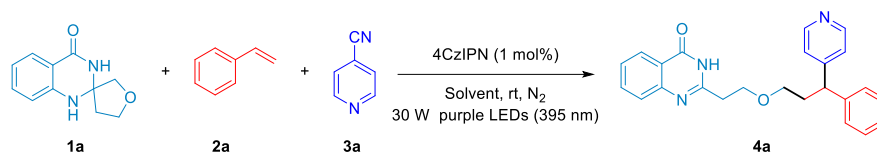

| Entry    | Solvent            | Yield (%) <sup>b</sup> |
|----------|--------------------|------------------------|
| <b>1</b> | <b>DMSO</b>        | <b>88</b>              |
| 2        | DMF                | 83                     |
| 3        | DMAc               | 48                     |
| 4        | NMP                | 66                     |
| 5        | CH <sub>3</sub> CN | Trace                  |
| 6        | Acetone            | Trace                  |
| 7        | MeOH               | Trace                  |
| 8        | DCE                | Trace                  |
| 9        | THF                | Trace                  |
| 10       | Toluene            | Trace                  |

<sup>a</sup>Reaction conditions: **1a** (0.3 mmol, 1.5 equiv.), **2a** (0.2 mmol, 1.0 equiv.), **3a** (0.3 mmol, 1.5 equiv.) and 4CzIPN (1 mol%) in Solvent (2.0 mL) with 30 W purple LEDs irradiation at room temperature for 28 h under N<sub>2</sub>. <sup>b</sup>Yield of isolated product.

#### 5) Control Experiments<sup>a</sup>

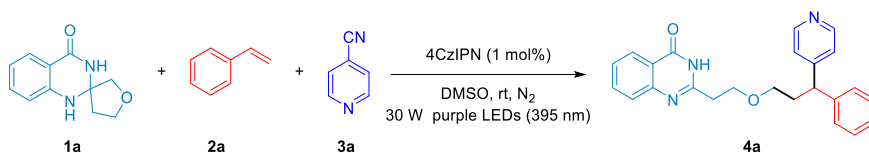

| Entry | Reaction Conditions | Yield (%) |
|-------|---------------------|-----------|
| 1     | In dark             | N.R.      |
| 2     | In air              | N.R.      |

<sup>a</sup>Reaction conditions: **1a** (0.3 mmol, 1.5 equiv.), **2a** (0.2 mmol, 1.0 equiv.), **3a** (0.3 mmol, 1.5 equiv.) and 4CzIPN (1 mol%) in DMSO (2.0 mL) with 30 W purple LEDs irradiation at room temperature for 28 h in air, in dark or under N<sub>2</sub>.

## 4. Respective Procedure

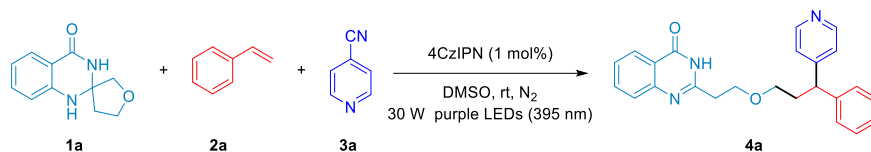

To a 10 mL oven-dried Schlenk tube equipped with a magnetic stir bar, spiro dihydroquinazolinone **1a** (0.3 mmol, 61.3 mg, 1.5 equiv.), 4-cyanopyridine **3a** (0.3 mmol, 31.2 mg, 1.5 equiv.), and 4CzIPN (1.6 mg, 1 mol%) were added. The tube was evacuated and backfilled with nitrogen (3 times). Then, a solution of styrene **2a** (0.2 mmol, 23  $\mu$ l, 1.0 equiv.) in DMSO (2.0 mL) was injected by a syringe under a nitrogen atmosphere. The reaction mixture was stirred under irradiation with a 30 W purple LEDs ( $\lambda$  = 395 nm, positioned ~1.0 cm from the bulb) for 28 h. Upon completion, the mixture was quenched with water and extracted with EtOAc (3  $\times$  10 mL). The combined organic layer was washed with brine (10 mL), dried over Na<sub>2</sub>SO<sub>4</sub>, and concentrated under in vacuo. The crude product was purified by flash column chromatography on silica gel (EtOAc eluent), yielding the desired product **4a** as a yellow liquid.

## 5. Large-Scale Synthesis of 4a

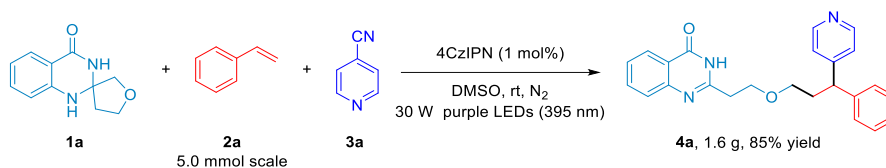

To a 200 mL oven-dried Schlenk tube equipped with a magnetic stir bar, spiro dihydroquinazolinone **1a** (7.5 mmol, 1.5 g, 1.5 equiv.), 4-cyanopyridine **3a** (7.5 mmol, 0.8 g, 1.5 equiv.), and 4CzIPN (0.05 mmol, 39.4 mg, 1 mol%) were added. The tube was evacuated and backfilled with nitrogen (3 times). Then, a solution of styrene **2a** (5.0 mmol, 0.6 mL, 1.0 equiv.) in DMSO (50 mL) was injected by a syringe under a nitrogen atmosphere. The reaction mixture was stirred under irradiation with a 30 W purple LEDs ( $\lambda = 395$  nm, positioned ~1.0 cm from the bulb) for 56 h. Upon completion, the mixture was quenched with water and extracted with EtOAc (3  $\times$  10 mL). The combined organic layer was washed with brine (20 mL), dried over Na<sub>2</sub>SO<sub>4</sub>, and concentrated under in vacuo. The crude product was purified by flash column chromatography on silica gel (EtOAc eluent), yielding the desired product **4a** as a yellow liquid (1.6 g, 85% yield).



## 6. Derivatizations of 4a

### 6.1 Amination of 4a with Benzylamine

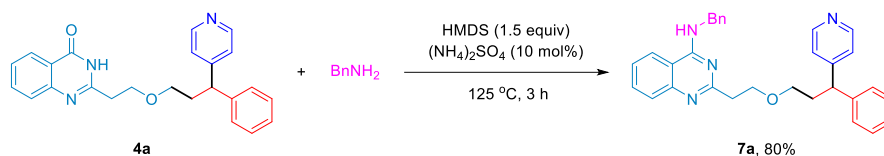

To a 10 mL oven-dried Schlenk tube equipped with a magnetic stir bar, **4a** (0.2 mmol, 1.0 equiv.), BnNH<sub>2</sub> (0.3 mmol, 1.5 equiv.), HMDS (0.3 mmol, 1.5 equiv.) and (NH<sub>4</sub>)<sub>2</sub>SO<sub>4</sub> (0.02 mmol, 10 mol%) were added. The tube was evacuated and backfilled with nitrogen (3 times). Place the tube in an oil bath. Pre-heat the tube to 125 °C. Stir the mixture for 3 h. After completion of the reaction, the reaction mixture was cooled to room temperature. Dilute the reaction mixture with DCM and purify by flash column chromatography on silica gel (EtOAc eluent) to afford the corresponding product **7a** (76.0 mg, 80% yield).

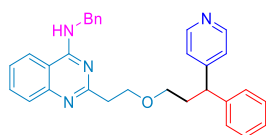

**N-Benzyl-2-(2-(3-phenyl-3-(pyridin-4-yl)propoxy)ethyl)quinazolin-4-amine (7a):** Yellow oil (76.0 mg, 80% yield); *R<sub>f</sub>* = 0.3 (EA); <sup>1</sup>H NMR (400 MHz, CDCl<sub>3</sub>) δ 8.30 (d, *J* = 6.0 Hz, 2H), 7.72 (d, *J* = 8.4 Hz, 2H), 7.61 – 7.56 (m, 1H), 7.28 – 7.14 (m, 9H), 7.03 (d, *J* = 6.8 Hz, 2H), 6.96 (d, *J* = 5.6 Hz, 2H), 4.76 (d, *J* = 5.2 Hz, 2H), 4.01 – 3.96 (m, 1H), 3.85 (t, *J* = 6.8 Hz, 2H), 3.28 (t, *J* = 6.4 Hz, 2H), 3.07 (t, *J* = 6.8 Hz, 2H), 2.17 (dd, *J* = 14.0, 6.4 Hz, 2H); <sup>13</sup>C NMR (100 MHz, CDCl<sub>3</sub>) δ 164.8, 159.4, 153.8, 149.7, 142.8, 138.7, 132.55, 128.7, 128.6, 128.04, 127.99, 127.9, 127.5, 126.7, 125.3, 123.3, 121.8, 120.8, 113.4, 69.5, 67.9, 46.5, 45.1, 40.3, 34.6 ppm; HRMS (ESI) *m/z*: [M + H]<sup>+</sup> Calcd for C<sub>31</sub>H<sub>30</sub>N<sub>4</sub>O 475.2492; Found 479.2508.

### 6.2 Reduction of 4a with NaBH<sub>4</sub>

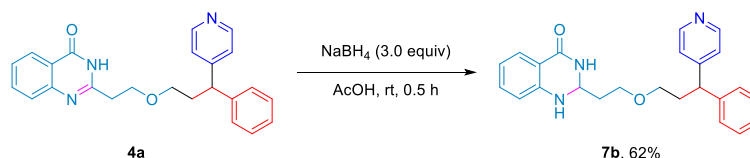

To a 10 mL oven-dried Schlenk tube equipped with a magnetic stir bar, **4a** (0.2 mmol, 1.0 equiv.) was added. The tube was evacuated and backfilled with nitrogen (3 times). Then a solution of AcOH (2.0 mL) was injected by a syringe under nitrogen atmosphere. The solution was cooled to 0 °C, and NaBH<sub>4</sub> (0.4 mmol, 2.0 equiv.) was added. The reaction mixture was stirred at 0 °C for 0.5 h until complete consumption of **4a**. The reaction was quenched with saturated aqueous NH<sub>4</sub>Cl solution and extracted with EA (3 × 10 mL). The combined organic layers were dried over anhydrous MgSO<sub>4</sub>, filtered, concentrated under reduced pressure, and purified by flash column chromatography on silica gel (eluent: EA) to afford **7b** as a yellow oil (48.1 mg, 62% yield).

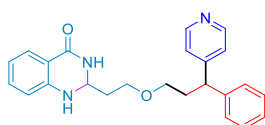

**2-(2-(3-Phenyl-3-(pyridin-4-yl)propoxy)ethyl)-2,3-dihydroquinazolin-4(1H)-one(7b):** Yellow oil (48.1 mg, 62% yield); *R*<sub>f</sub> = 0.3 (EA); <sup>1</sup>H NMR (400 MHz, CDCl<sub>3</sub>) δ 8.49 (d, *J* = 4.4 Hz, 2H), 7.87 (dd, *J* = 8.0, 1.6 Hz, 1H), 7.32 – 7.17 (m, 9H), 6.82 (t, *J* = 7.6 Hz, 1H), 6.61 (d, *J* = 8.4 Hz, 1H), 4.99 (t, *J* = 6.0 Hz, 1H), 4.88 (s, 1H), 4.10 (t, *J* = 8.0 Hz, 1H), 3.56 – 3.52 (m, 2H), 3.38 – 3.35 (m, 2H), 2.36 – 2.31 (m, 2H), 2.05 – 2.00 (m, 2H); <sup>13</sup>C NMR (100 MHz, CDCl<sub>3</sub>) δ 165.4, 153.5, 149.8, 147.7, 142.3, 133.8, 128.9, 128.5, 127.9, 127.0, 123.2, 119.2, 115.9, 114.7, 69.0, 67.8, 65.6, 47.0, 35.1, 34.5 ppm; HRMS (ESI) *m/z*: [M + H]<sup>+</sup> Calcd for C<sub>24</sub>H<sub>25</sub>N<sub>3</sub>O<sub>2</sub> 388.2020; Found 388.2011.

### 6.3 Two-Component Reaction

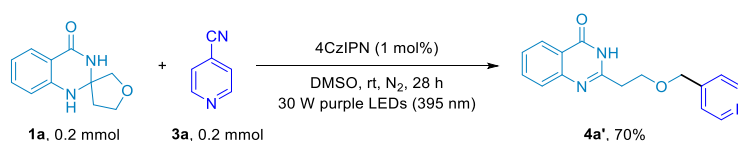

To a 10 mL oven-dried Schlenk tube equipped with a magnetic stir bar, spiro dihydroquinazolinone **1a** (0.2 mmol, 40.7 mg, 1.0 equiv.), 4-cyanopyridine **3a** (0.3 mmol, 20.8 mg, 1.5 equiv.), and 4CzIPN (1.6 mg, 1 mol%) were added. The tube was evacuated and backfilled with nitrogen (3 times). Then, a solution of DMSO (2.0 mL) was injected by a syringe under a nitrogen atmosphere. The reaction mixture was stirred under irradiation with a 30 W purple LEDs ( $\lambda$  = 395 nm, positioned ~1.0 cm from the bulb) for 28 h. The crude product was purified by flash column

chromatography on silica gel (EtOAc eluent), yielding the desired product **4a'** as a white solid.

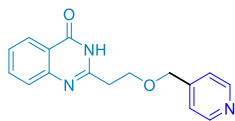

**2-(2-(Pyridin-4-ylmethoxy)ethyl)quinazolin-4(3H)-one(4a')**: white solid (56.2 mg, 70% yield);  $R_f = 0.2$  (EA);  $^1\text{H NMR}$  (400 MHz, DMSO- $d_6$ )  $\delta$  12.31 (s, 1H), 8.44 – 8.43 (m, 2H), 8.06 – 8.03 (m, 1H), 7.77 – 7.72 (m, 1H), 7.56 (d,  $J = 8.0$  Hz, 1H), 7.45 – 7.41 (m, 1H), 7.23 (d,  $J = 6.0$  Hz, 2H), 4.53 (s, 2H), 3.86 (t,  $J = 6.4$  Hz, 2H), 2.92 (t,  $J = 6.4$  Hz, 2H);  $^{13}\text{C NMR}$  (100 MHz, DMSO- $d_6$ )  $\delta$  162.2, 155.8, 150.0, 149.3, 148.1, 134.9, 127.3, 126.6, 126.3, 122.2, 121.4, 70.6, 67.9, 35.4 ppm; **HRMS** (ESI)  $m/z$ :  $[\text{M} + \text{H}]^+$  Calcd for  $\text{C}_{16}\text{H}_{16}\text{N}_3\text{O}_2$  281.3109; Found 281.3102.

## 7. Investigation of the Reaction Mechanism

### 7.1 Radical Trapping Reaction with TEMPO

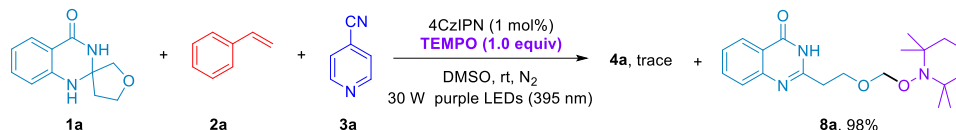

To a 10 mL oven-dried Schlenk tube equipped with a magnetic stir bar, **1a** (0.3 mmol, 1.5 equiv.), **3a** (0.3 mmol, 1.5 equiv.), 4CzIPN (1.6 mg, 1 mol%) and TEMPO (0.2 mmol 1.0 equiv.) were added. The tube was evacuated and backfilled with nitrogen (3 times). Then, a solution of **2a** (0.2 mmol, 1.0 equiv.) in DMSO (2.0 mL) was injected by a syringe under a nitrogen atmosphere. The reaction mixture was stirred under irradiation with a 30 W purple LEDs ( $\lambda = 395$  nm, positioned  $\sim 1.0$  cm from the bulb) for 28 h. After that, it was found that the formation of **4a** was totally inhibited. The crude product was purified by flash column chromatography on silica gel to afford compound **8a** as a white solid (72.8 mg, 98% yield). These results indicate that a radical intermediate might be involved in this transformation.

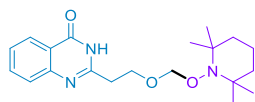

#### 2-((2-(((2,2,6,6-Tetramethylpiperidin-1-yl)oxy)methoxy)ethyl)quinazolin-4(3H)-one(**8a**):

White solid (70.5 mg, 98% yield);  $R_f = 0.7$  (EtOAc);  $^1\text{H NMR}$  (400 MHz,  $\text{CDCl}_3$ )  $\delta$  10.29 (s, 1H), 8.26 (d,  $J = 8.0$  Hz, 1H), 7.76 – 7.72 (m, 1H), 7.65 (d,  $J = 8.4$  Hz, 1H), 7.47 – 7.43 (m, 1H), 4.95 (s, 2H), 4.06 (t,  $J = 5.6$  Hz, 2H), 3.04 (t,  $J = 5.6$  Hz, 2H), 1.46 (s, 4H), 1.25 (s, 2H), 1.16 – 1.09 (m, 12H);  $^{13}\text{C NMR}$  (100 MHz,  $\text{CDCl}_3$ )  $\delta$  162.1, 154.8, 148.9, 134.6, 127.1, 126.5, 121.2, 101.7, 66.6, 59.6, 39.7, 36.2, 33.2, 20.2, 17.1 ppm; **HRMS** (ESI)  $m/z$ :  $[\text{M} + \text{H}]^+$  Calcd for  $\text{C}_{20}\text{H}_{30}\text{N}_3\text{O}_3$  360.2282; Found 360.2278.

## 7.2 Radical Inhibiting Reaction with BHT

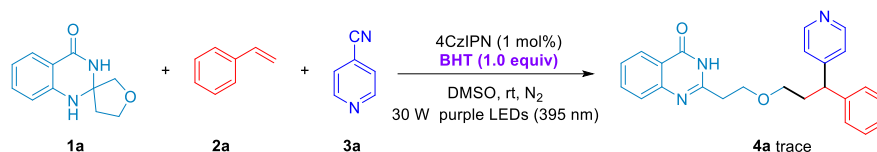

To a 10 mL oven-dried Schlenk tube equipped with a magnetic stir bar, **1a** (0.3 mmol, 1.5 equiv.), **3a** (0.3 mmol, 1.5 equiv.), 4CzIPN (1.6 mg, 1 mol%) and BHT (0.2 mmol 1.0 equiv.) were added. The tube was evacuated and backfilled with nitrogen (3 times). Then, a solution of **2a** (0.2 mmol, 1.0 equiv.) in DMSO (2.0 mL) was injected by a syringe under a nitrogen atmosphere. The reaction mixture was stirred under irradiation with a 30 W purple LEDs ( $\lambda = 395$  nm, positioned  $\sim 1.0$  cm from the bulb) for 28 h. After that, it was found that the formation of **4a** was totally inhibited. This result indicates that the reaction might proceed via a radical pathway.

## 7.3 Radical Clock Experiments

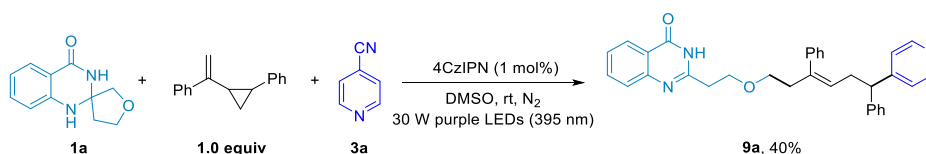

To a 10 mL oven-dried Schlenk tube equipped with a magnetic stir bar, **1a** (0.3 mmol, 1.5 equiv.), **3a** (0.3 mmol, 1.5 equiv.), and 4CzIPN (1.6 mg, 1 mol%) was added. The tube was evacuated and backfilled with nitrogen (3 times). Then, a solution of the alkene (0.2 mmol, 1.0 equiv.) in DMSO (2.0 mL) was injected by a syringe under a nitrogen atmosphere. The reaction mixture was stirred under irradiation with a 30 W purple LEDs ( $\lambda = 395$  nm, positioned  $\sim 1.0$  cm from the bulb) for 28 h. Upon completion, the mixture was quenched with water and extracted with EtOAc ( $3 \times 10$  mL). The combined organic layer was washed with brine (10 mL), dried over Na<sub>2</sub>SO<sub>4</sub>, and concentrated under in vacuo. The crude product was purified by flash column chromatography on silica gel (EtOAc eluent), yielding the desired product **9a** as a yellow liquid (40.1 mg, 40%).

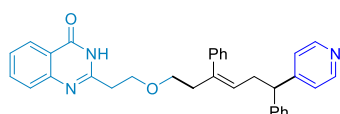

**(Z)-2-(2-((3,6-Diphenyl-6-(pyridin-4-yl)hex-3-en-1-yl)oxy)ethyl)quinazolin-4(3H)-one(9a):**

Yellow solid (40.1 mg, 40% yield );  $R_f$  = 0.5 (EtOAc); The NH on the heterocycle was not detected.

**$^1\text{H}$  NMR** (400 MHz,  $\text{CDCl}_3$ )  $\delta$  8.44 (s, 2H), 8.27 – 8.24 (m, 1H), 7.74 – 7.70 (m, 1H), 7.63 (d,  $J$  = 7.6 Hz, 1H), 7.45 – 7.41 (m, 1H), 7.30 – 7.15 (m, 10H), 7.01 – 6.99 (m, 2H), 5.44 (t,  $J$  = 7.8 Hz, 1H), 3.98 (t,  $J$  = 8.0 Hz, 1H), 3.68 (t,  $J$  = 6.0 Hz, 2H), 3.36 (t,  $J$  = 6.0 Hz, 2H), 2.88 (t,  $J$  = 5.6 Hz, 2H), 2.73 – 2.68 (m, 2H), 2.54 (t,  $J$  = 6.4 Hz, 2H).  **$^{13}\text{C}$  NMR** (100 MHz,  $\text{CDCl}_3$ )  $\delta$  162.0, 155.1, 154.9, 148.8, 148.3, 142.2, 139.7, 139.5, 134.6, 128.5, 128.3, 128.2, 128.0, 126.9, 126.7, 126.52, 126.49, 126.4, 123.8, 121.2, 69.3, 67.4, 50.9, 39.2, 35.8, 34.1 ppm; **HRMS** (ESI)  $m/z$ :  $[\text{M} + \text{Na}]^+$  Calcd for  $\text{C}_{33}\text{H}_{31}\text{N}_3\text{O}_2\text{Na}$  524.2398; Found 524.2409.

## 7.4 Stern–Volmer Fluorescent Quenching Studies

Stern-Volmer quenching experiments were carried by FLS980 Series of Fluorescence Spectrometers, using a  $5 \times 10^{-4}$  M solution of 4CzIPN with variable concentrations (0.2, 0.4, 0.6, 0.8, 1.0 mM) of **1a**, **2a** and **3a** in DMSO respectively. The intensity of the emission peak at 530 nm ( $\lambda_{\text{ex}}$  = 395 nm) expressed as the ratio  $I_0/I$ , where  $I_0$  is the emission intensity of photocatalyst at 530 nm in the absence of a quencher and  $I$  is the observed intensity, as a function of the quencher concentration was measured. Stern-Volmer plots for each component are given below. Stern-Volmer fluorescence quenching experiments revealed that only **1a** could quench the excited state of 4CzIPN\*. These results are shown in Figure S2 and support the proposed reductive quenching pathway.

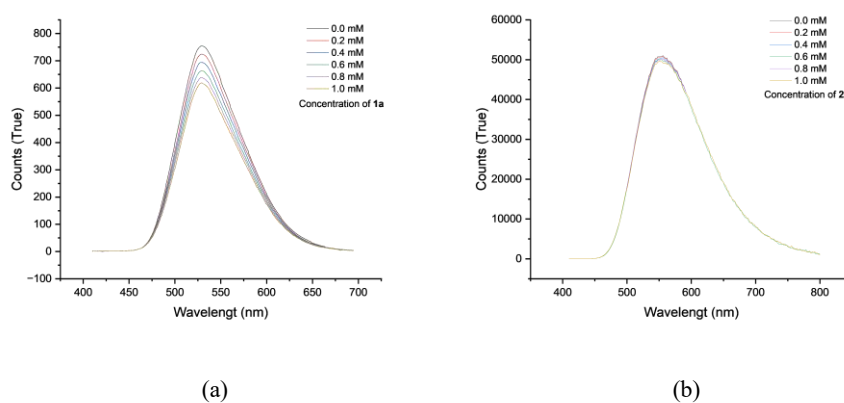

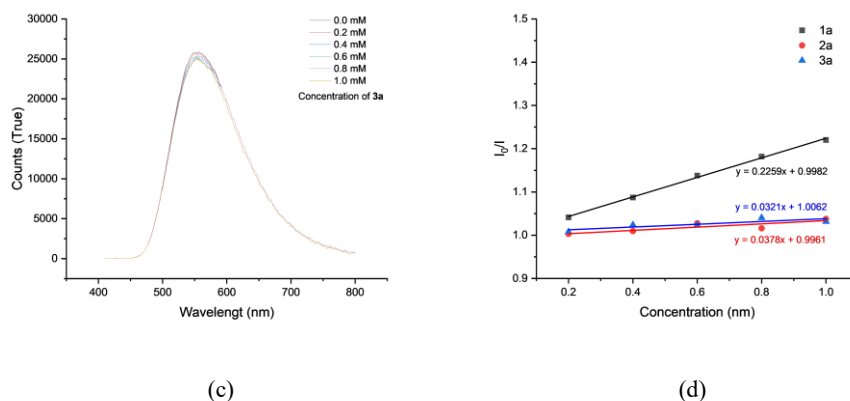

**Figure S2.** (a) The fluorescence emission spectra of 4CzIPN\* with different concentration of **1a** added. (b) The fluorescence emission spectra of 4CzIPN\* with different concentration of **2a** added. (c) The fluorescence emission spectra of 4CzIPN\* with different concentration of **3a** added. (d) Stern-Volmer emission quenching studies of **1a**, **2a** and **3a**.  $I_0$  is the inherent fluorescence intensity of 4CzIPN.  $I$  is the fluorescence intensity of 4CzIPN in the presence of **1a**, **2a** and **3a**.

## 7.5 Light on/off Experiments

To further examine the impact of light, we conducted experiments under alternating periods of irradiation and darkness. The product was purified by column chromatography, and the yield was calculated.

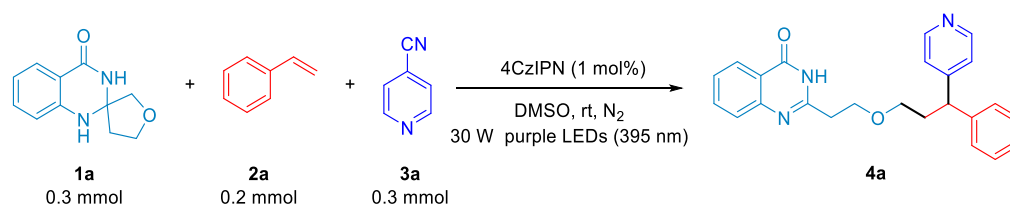

| on/off  | on | on | off | on | off | on | off |
|---------|----|----|-----|----|-----|----|-----|
| Time/h  | 0  | 2  | 4   | 6  | 8   | 10 | 12  |
| Yield/% | 0  | 22 | 23  | 34 | 35  | 51 | 52  |

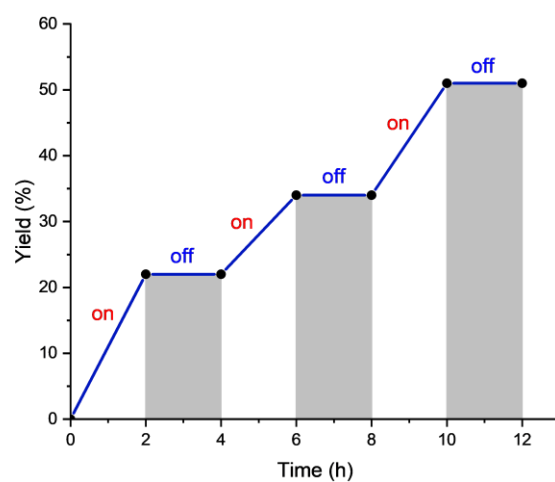

**Figure S3.** Light on/off Experiment of **1a**, **2a** and **3a**

The results of light on-off experiments indicated that the reaction proceeded only under the irradiation of light. The reaction maybe proceed by a catalytic process rather than by a radical chain process.



## 7.6 Mechanistic Validation of the Absence of Photocatalysts

### 7.6.1 UV-vis Absorption Experiments

Given that a yield of 71% was achieved in the absence of a photocatalyst during condition screening, we conducted UV absorption experiments to investigate the possible involvement of an EDA complex.

UV-vis absorption experiments were performed using a spectrophotometer. The samples were measured in a 1.5 mL quartz cuvette fitted with a PTFE stopper. Spiro dihydroquinazolinone **1a**, styrene **2a**, 4-cyanopyridine **3a**, **1a+2a**, **1a+3a**, **1a+2a+3a** were prepared as a 5 mM, 5 mM, 5 mM, 5 mM + 5 mM, 5 mM + 5 mM, and 5 mM + 5 mM + 5 mM in DMSO for measurement.

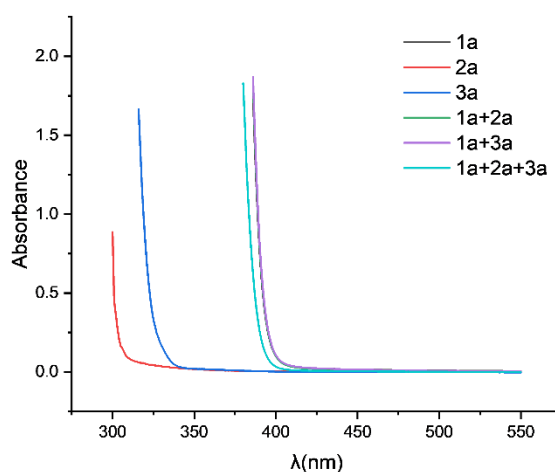

**Figure S4.** UV-vis absorption experiments

UV absorption spectroscopy results indicated that **1a**, **2a** and **3a** were all capable of absorbing light within the wavelength range of the light source. The UV absorption bands of the mixtures of **1a** with **2a** and **1a** with **3a** showed no significant changes compared to that of substrate **1a** alone. However, the UV-visible absorption spectra of the ternary mixture of **1a**, **2a** and **3a** exhibited a blue shift in the visible region.

## 7.6.2 Emission Quenching Experiments (Stern-Volmer studies)

Stern-Volmer quenching experiments were carried by PerkinElmer LS-55 spectrofluorophotometer, using a  $1 \times 10^{-3}$  M solution of **1a** with variable concentrations (0.1, 0.2, 0.3, 0.4 mM) of **2a** and **3a** in DMSO (Figure S5). The samples were prepared in 20 mL quartz cuvettes. The intensity of the emission peak at 415 nm ( $\lambda_{\text{ex}} = 395$  nm) expressed as the ratio  $I_0/I$ , where  $I_0$  is the emission intensity of **1a** at 415 nm in the absence of a quencher and  $I$  is the observed intensity, as a function of the quencher concentration was measured. Stern-Volmer plots for each component are given below. Stern-Volmer experiments showed that the emission of **1a** could be effectively quenched by **3a**, which suggests that a SET from photoexcited **1a**<sup>\*</sup> to **3a** is feasible.

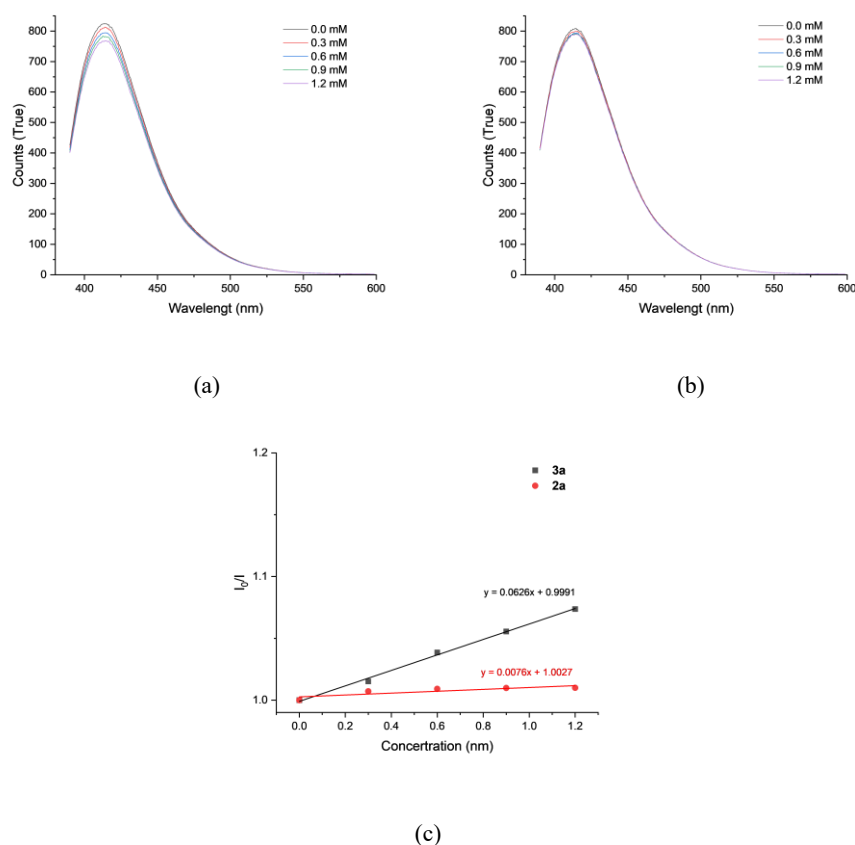

**Figure S5.** (a) The fluorescence emission spectra of **1a**<sup>\*</sup> with different concentration of **3a** added. (b) The fluorescence emission spectra of **1a**<sup>\*</sup> with different concentration of **2a** added. (c) Stern-Volmer emission quenching studies of **2a** and **3a**.  $I_0$  is the inherent fluorescence intensity of **1a**.  $I$  is the fluorescence intensity of **1a** in the presence of **2a** and **3a**.

Based on these experimental results and relevant literature<sup>[7]</sup>, a plausible reaction mechanism is proposed in Figure S6. Initially, **1a** may act as an intrinsic photosensitizer, undergoing direct

photoexcitation to its excited state **1a\***, which then promotes the reductive cleavage of **3a** to generate radical species **I** and intermediate **II**. Subsequently, intermediate **II** undergoes deprotonation and  $\beta$ -scission, yielding the alkyl radical **III**. Radical addition of **III** to styrene **2a** gives the stable benzyl radical **IV**. Finally, radical-radical cross-coupling of **I** and **IV**, followed by  $\text{CN}^-$  dissociation affords the final product **4a**.

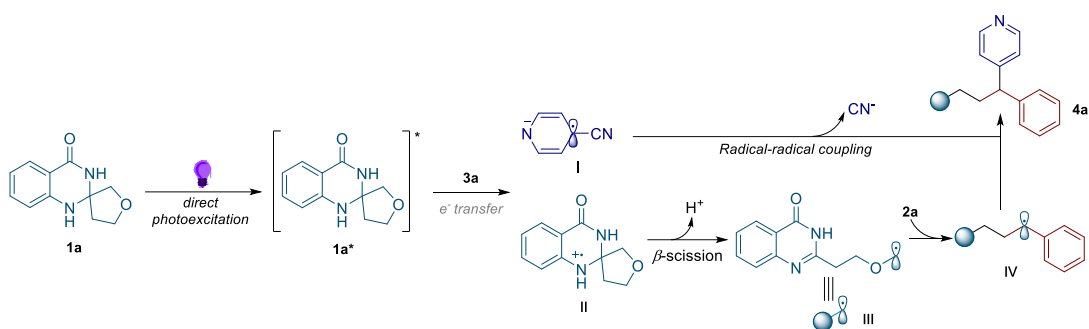

**Figure S6.** Reaction Mechanism Diagram

## 8. References

1. H.-J. Miao, J.-H. Zhang, W. Li, W. Yang, H. Xin, P. Gao, X.-H. Duan and L.-N. Guo, *Chem. Sci.* **2024**, *15*, 8993–8999.
2. W.-P. Yang, H.-J. Miao, L. Liu, X.-H. Duan and L.-N. Guo. *Org. Lett.* **2024**, *26*, 7442–7446.
3. P. P. S. Kumar, P. A. Suchetan, S. Sreenivasa, S. Naveen, N. K. Lokanath and D. B. A. Kumar, *J Struct Chem.* **2015**, *56*, 1390-1397.
4. J. A. Andrews, R. G. Woodger, C. F. Palmer, D. L. Poole and M. C. Willis, *Angew. Chem. Int. Ed.* **2024**, *63*, e202407970.
5. J. A. Andrews, J. Kalepu, C. F. Palmer, D. L. Poole, K. E. Christensen and M. C. Willis, *J. Am. Chem. Soc.* **2023**, *145*, 21623–21629.
6. L. Li, S.-Q. Zhang, Y. Chen, X. Cui, G. Zhao, Z. Tang and G.- X. Li, *ACS Catal.* **2022**, *12*, 15334–15340.
7. Hu, Y.-Y.; Liu, Z.-L.; Xiang, H.-Y.; Chen, X.-Q.; Chen, K.; Yang, H. *Org. Lett.* **2025**, *27*, 37, 10359–10364.

## 9. Characterization of the starting materials

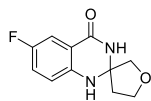

**6'-Fluoro-4,5-dihydro-1'H,2H-spiro[furan-3,2'-quinazolin]-4'(3'H)-one(1b):** White solid (1.822 g, 82% yield),  $R_f = 0.5$  (EA);  $^1\text{H NMR}$  (400 MHz,  $\text{DMSO-}d_6$ )  $\delta$  8.47 (s, 1H), 7.27 (dd,  $J = 9.2$ , 3.2 Hz, 1H), 7.11 (td,  $J = 8.8$ , 3.2 Hz, 1H), 7.04 (s, 1H), 6.74 (q,  $J = 4.0$  Hz, 1H), 3.87 – 3.80 (m, 2H), 3.64 (d,  $J = 9.2$  Hz, 1H), 3.54 (d,  $J = 8.8$  Hz, 1H), 2.12 – 2.04 (m, 2H);  $^{13}\text{C NMR}$  (100 MHz,  $\text{DMSO-}d_6$ )  $\delta$  163.0, 155.3 (d,  $J_{\text{C-F}} = 232.2$  Hz), 144.3, 121.3 (d,  $J_{\text{C-F}} = 23.2$  Hz), 116.8 (d,  $J_{\text{C-F}} = 6.7$  Hz), 115.6 (d,  $J_{\text{C-F}} = 6.4$  Hz), 113.0 (d,  $J_{\text{C-F}} = 23.2$  Hz), 77.0, 76.6, 66.5, 39.6;  $^{19}\text{F NMR}$  (376 MHz,  $\text{DMSO-}d_6$ )  $\delta$  -123.78 ppm; **HRMS** (ESI)  $m/z$ :  $[\text{M} + \text{H}]^+$  Calcd for  $\text{C}_{11}\text{H}_{12}\text{FN}_2\text{O}_2$  223.0877; Found 223.0877.

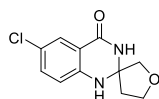

**6'-Chloro-4,5-dihydro-1'H,2H-spiro[furan-3,2'-quinazolin]-4'(3'H)-one(1c):** White solid (2.124 g, 89% yield),  $R_f = 0.5$  (EA);  $^1\text{H NMR}$  (400 MHz,  $\text{DMSO-}d_6$ )  $\delta$  8.47 (s, 1H), 7.49 (d,  $J = 2.8$  Hz, 1H), 7.29 (s, 1H), 7.25 (dd,  $J = 8.4$ , 2.4 Hz, 1H), 6.74 (d,  $J = 8.8$  Hz, 1H), 3.90 – 3.81 (m, 2H), 3.64 (d,  $J = 8.8$  Hz, 1H), 3.53 (d,  $J = 9.2$  Hz, 1H), 2.13 – 2.05 (m, 4H);  $^{13}\text{C NMR}$  (100 MHz,  $\text{DMSO-}d_6$ )  $\delta$  162.7, 146.4, 133.6, 127.0, 121.3, 117.1, 115.9, 77.2, 76.5, 66.6, 39.6 ppm; **HRMS** (ESI)  $m/z$ :  $[\text{M} + \text{H}]^+$  Calcd for  $\text{C}_{11}\text{H}_{12}\text{ClN}_2\text{O}_2$  239.0582; Found 239.0580.

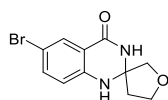

**6'-Bromo-4,5-dihydro-1'H,2H-spiro[furan-3,2'-quinazolin]-4'(3'H)-one(1d):** White solid (2.496 g, 88% yield),  $R_f = 0.5$  (EA);  $^1\text{H NMR}$  (400 MHz,  $\text{DMSO-}d_6$ )  $\delta$  8.46 (s, 1H), 7.61 (d,  $J = 2.4$  Hz, 1H), 7.35 (dd,  $J = 8.4$ , 2.4 Hz, 1H), 7.31 (s, 1H), 6.69 (d,  $J = 8.4$  Hz, 1H), 3.90 – 3.80 (m, 2H), 3.64 (d,  $J = 8.8$  Hz, 1H), 3.53 (d,  $J = 9.2$  Hz, 1H), 2.16 – 2.03 (m, 2H);  $^{13}\text{C NMR}$  (100 MHz,  $\text{DMSO-}d_6$ )  $\delta$  162.6, 146.7, 136.3, 129.9, 117.4, 116.4, 108.6, 77.2, 76.4, 66.6, 39.6 ppm; **HRMS** (ESI)  $m/z$ :  $[\text{M} + \text{H}]^+$  Calcd for  $\text{C}_{11}\text{H}_{12}\text{BrN}_2\text{O}_2$  283.0077; Found 283.0072.

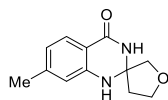

**7'-Methyl-4,5-dihydro-1'H,2H-spiro[furan-3,2'-quinazolin]-4'(3'H)-one(1e):** White solid (1.746 g, 80% yield),  $R_f = 0.5$  (EA);  $^1\text{H NMR}$  (400 MHz, DMSO- $d_6$ )  $\delta$  8.19 (s, 1H), 7.45 (d,  $J = 8.0$  Hz, 1H), 6.95 (s, 1H), 6.51 (s, 1H), 6.46 (d,  $J = 8.0$  Hz, 1H), 3.87 – 3.80 (m, 2H), 3.61 (d,  $J = 8.8$  Hz, 1H), 3.53 (d,  $J = 8.8$  Hz, 1H), 2.17 (s, 3H), 2.10 – 2.03 (m, 2H);  $^{13}\text{C NMR}$  (100 MHz, DMSO- $d_6$ )  $\delta$  163.9, 147.7, 143.9, 128.0, 119.0, 115.1, 112.6, 77.2, 76.5, 66.6, 39.8, 21.9 ppm; **HRMS** (ESI)  $m/z$ :  $[\text{M} + \text{H}]^+$  Calcd for  $\text{C}_{12}\text{H}_{15}\text{N}_2\text{O}_2$  241.0948; Found 241.0949.

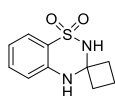

**2H,4H-Spiro[benzo[e][1,2,4]thiadiazine-3,1'-cyclobutane] 1,1-dioxide (1l):** White solid (2.019 g, 90% yield),  $R_f = 0.5$  (EA);  $^1\text{H NMR}$  (400 MHz, DMSO- $d_6$ )  $\delta$  7.77 (s, 1H), 7.48 (s, 1H), 7.42 (d,  $J = 8.0$  Hz, 1H), 7.29 – 7.24 (m, 1H), 6.74 (d,  $J = 8.4$  Hz, 1H), 6.67 (t,  $J = 7.2$  Hz, 1H), 2.61 – 2.54 (m, 2H), 2.21 – 2.13 (m, 2H), 1.87 – 1.69 (m, 2H).  $^{13}\text{C NMR}$  (100 MHz, DMSO- $d_6$ )  $\delta$  142.5, 132.9, 123.4, 120.5, 116.0, 115.5, 71.0, 35.7, 12.8. **HRMS** (ESI)  $m/z$ :  $[\text{M} + \text{H}]^+$  Calcd for  $\text{C}_{10}\text{H}_{13}\text{N}_2\text{O}_2\text{S}$  225.0692; Found 225.0697.

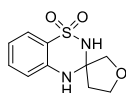

**4',5'-Dihydro-2H,2'H,4H-spiro[benzo[e][1,2,4]thiadiazine-3,3'-furan] 1,1-dioxide (1m):** White solid (2.019 g, 91% yield),  $R_f = 0.5$  (EA);  $^1\text{H NMR}$  (400 MHz, DMSO- $D_6$ )  $\delta$  8.09 (s, 1H), 7.44 – 7.40 (m, 2H), 7.28 – 7.23 (m, 1H), 6.77 (d,  $J = 7.6$  Hz, 1H), 6.70 – 6.65 (m, 1H), 3.87 (d,  $J = 9.2$  Hz, 1H), 3.67 (d,  $J = 9.2$  Hz, 1H), 3.38 (s, 2H), 2.44 – 2.37 (m, 1H), 2.13 – 2.06 (m, 1H);  $^{13}\text{C NMR}$  (100 MHz, DMSO- $D_6$ )  $\delta$  143.1, 133.5, 124.1, 120.8, 116.9, 116.5, 77.0, 76.8, 66.6, 40.0 ppm; **HRMS** (ESI)  $m/z$ :  $[\text{M} + \text{H}]^+$  Calcd for  $\text{C}_{10}\text{H}_{13}\text{N}_2\text{O}_3\text{S}$  241.2845; Found 241.2849.

## 10. Characterization of Products

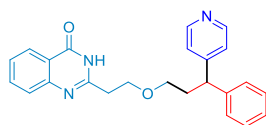

**2-(2-(3-Phenyl-3-(pyridin-4-yl)propoxy)ethyl)quinazolin-4(3H)-one(4a):** Yellow oil (67.8 mg, 88% yield),  $R_f = 0.2$  (EA);  $^1\text{H NMR}$  (400 MHz,  $\text{CDCl}_3$ )  $\delta$  11.78 (s, 1H), 8.42 (d,  $J = 4.8$  Hz, 2H), 8.29 – 8.27 (m, 1H), 7.75 – 7.71 (m, 1H), 7.66 (d,  $J = 8.0$  Hz, 1H), 7.45 – 7.42 (m, 1H), 7.22 – 7.18 (m, 2H), 7.15 – 7.06 (m, 5H), 4.05 (t,  $J = 8.0$  Hz, 1H), 3.81 (t,  $J = 6.0$  Hz, 2H), 3.40 – 3.36 (m, 2H), 3.00 (t,  $J = 6.0$  Hz, 2H), 2.28 – 2.23 (m, 2H);  $^{13}\text{C NMR}$  (100 MHz,  $\text{CDCl}_3$ )  $\delta$  163.2, 154.8, 153.4, 149.5, 149.1, 142.2, 134.6, 128.6, 127.7, 127.0, 126.7, 126.4, 126.2, 123.1, 120.8, 68.4, 67.7, 46.5, 36.0, 34.2 ppm; **HRMS** (ESI)  $m/z$ :  $[\text{M} + \text{H}]^+$  Calcd for  $\text{C}_{24}\text{H}_{24}\text{N}_3\text{O}_2$  386.1863; Found 386.1856.

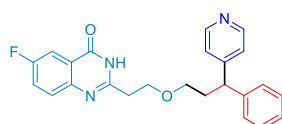

**6-Fluoro-2-(2-(3-phenyl-3-(pyridin-4-yl)propoxy)ethyl)quinazolin-4(3H)-one(4b):** Yellow oil (57.3 mg, 71% yield),  $R_f = 0.3$  (EA);  $^1\text{H NMR}$  (400 MHz,  $\text{CDCl}_3$ )  $\delta$  10.94 (s, 1H),  $\delta$  8.41 (s, 2H), 7.86 (dd,  $J = 8.4, 2.8$  Hz, 1H), 7.61 (dd,  $J = 8.8, 4.8$  Hz, 1H), 7.47 – 7.37 (m, 1H), 7.25 – 7.17 (m, 2H), 7.16 – 7.04 (m, 5H), 4.04 (t,  $J = 7.6$  Hz, 1H), 3.74 (t,  $J = 6.0$  Hz, 2H), 3.46 – 3.33 (m, 2H), 2.92 (t,  $J = 5.6$  Hz, 2H), 2.34 – 2.24 (m, 2H);  $^{13}\text{C NMR}$  (100 MHz,  $\text{CDCl}_3$ )  $\delta$  160.7 (d,  $J_{\text{C-F}} = 246.7$  Hz), 154.1, 153.8, 149.5, 145.7 (d,  $J_{\text{C-F}} = 2.4$  Hz), 142.2, 129.5 (d,  $J_{\text{C-F}} = 8.2$  Hz), 128.8, 127.9, 127.0, 123.3, 123.2 (d,  $J_{\text{C-F}} = 23.8$  Hz), 122.3 (d,  $J_{\text{C-F}} = 8.6$  Hz), 111.3 (d,  $J_{\text{C-F}} = 23.4$  Hz), 68.9, 67.9, 46.9, 35.9, 34.4 ppm;  $^{19}\text{F NMR}$  (376 MHz,  $\text{CDCl}_3$ )  $\delta$  -112.8 ppm; **HRMS** (ESI)  $m/z$ :  $[\text{M} + \text{H}]^+$  Calcd for  $\text{C}_{24}\text{H}_{23}\text{FN}_3\text{O}_2$  404.1769; Found 404.1760.

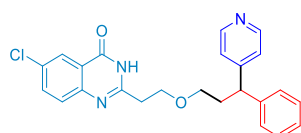

**6-Chloro-2-(2-(3-phenyl-3-(pyridin-4-yl)propoxy)ethyl)quinazolin-4(3H)-one(4c):** Yellow oil (58.8 mg, 70% yield),  $R_f = 0.3$  (EA);  $^1\text{H NMR}$  (400 MHz,  $\text{CDCl}_3$ )  $\delta$  11.27 (s, 1H), 8.41 (s, 2H), 8.19 (d,  $J = 2.4$  Hz, 1H), 7.63 (dd,  $J = 8.8, 2.8$  Hz, 1H), 7.55 (d,  $J = 8.8$  Hz, 1H), 7.21 – 7.17 (m, 2H),

7.14 – 7.08 (m, 5H), 4.02 (t,  $J = 8.0$  Hz, 1H), 3.75 (t,  $J = 5.6$  Hz, 2H), 3.40 – 3.36 (m, 2H), 2.93 (t,  $J = 6.0$  Hz, 2H), 2.27 (t,  $J = 6.8$  2H);  $^{13}\text{C}$  NMR (100 MHz,  $\text{CDCl}_3$ )  $\delta$  161.9, 155.2, 153.6, 149.6, 147.6, 142.2, 135.1, 132.3, 128.9, 128.8, 127.9, 126.9, 125.7, 123.2, 122.1, 68.8, 67.8, 46.8, 36.0, 34.4 ppm; **HRMS** (ESI)  $m/z$ :  $[\text{M} + \text{Na}]^+$  Calcd for  $\text{C}_{24}\text{H}_{22}\text{ClN}_3\text{O}_2\text{Na}$  442.1293; Found 442.1300.

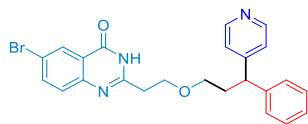

**6-Bromo-2-(2-(3-phenyl-3-(pyridin-4-yl)propoxy)ethyl)quinazolin-4(3H)-one(4d):** Yellow oil (63.1 mg, 68% yield),  $R_f = 0.3$  (EA);  $^1\text{H}$  NMR (400 MHz,  $\text{CDCl}_3$ )  $\delta$  10.84 (s, 1H), 8.42 (s, 1H), 8.34 (d,  $J = 2.0$  Hz, 1H), 7.77 – 7.74 (m, 1H), 7.46 (d,  $J = 8.8$  Hz, 1H), 7.21 – 7.18 (m, 3H), 7.14 – 7.09 (m, 5H), 4.03 (t,  $J = 8.0$  Hz, 1H), 3.72 (t,  $J = 5.6$  Hz, 2H), 3.41 – 3.31 (m, 2H), 2.89 (t,  $J = 5.6$  Hz, 2H), 2.33 – 2.23 (m, 2H);  $^{13}\text{C}$  NMR (100 MHz,  $\text{CDCl}_3$ )  $\delta$  161.3, 155.3, 153.7, 149.6, 147.9, 142.1, 137.8, 129.01, 128.98, 128.9, 127.9, 127.0, 123.3, 122.5, 120.1, 69.0, 67.8, 46.9, 36.0, 34.4 ppm; **HRMS** (ESI)  $m/z$ :  $[\text{M} + \text{H}]^+$  Calcd for  $\text{C}_{24}\text{H}_{23}\text{BrN}_3\text{O}_2$  464.0968; Found 464.0968.

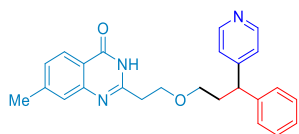

**7-Methyl-2-(2-(3-phenyl-3-(pyridin-4-yl)propoxy)ethyl)quinazolin-4(3H)-one(4e):** Yellow oil (62.3 mg, 78% yield),  $R_f = 0.3$  (EA);  $^1\text{H}$  NMR (400 MHz,  $\text{CDCl}_3$ )  $\delta$  11.29 (s, 1H), 8.36 (d,  $J = 5.6$  Hz, 2H), 8.09 (d,  $J = 8.0$  Hz, 1H), 7.38 (s, 1H), 7.21 – 7.13 (m, 3H), 7.10 – 7.01 (m, 5H), 4.00 (t,  $J = 8.0$  Hz, 1H), 3.73 (t,  $J = 6.0$  Hz, 2H), 3.35 – 3.31 (m, 2H), 2.91 (t,  $J = 5.6$  Hz, 2H), 2.41 (s, 3H), 2.24 – 2.19 (m, 2H).  $^{13}\text{C}$  NMR (100 MHz,  $\text{CDCl}_3$ )  $\delta$  162.9, 154.8, 153.4, 149.6, 149.2, 145.6, 142.3, 128.6, 128.0, 127.8, 126.8, 126.7, 126.1, 123.1, 118.4, 68.6, 67.8, 46.6, 36.0, 34.3, 21.9 ppm; **HRMS** (ESI)  $m/z$ :  $[\text{M} + \text{H}]^+$  Calcd for  $\text{C}_{25}\text{H}_{26}\text{N}_3\text{O}_2$  400.2020; Found 400.2025.

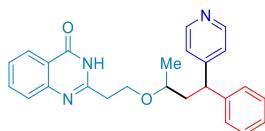

**2-(2-((4-Phenyl-4-(pyridin-4-yl)butan-2-yl)oxy)ethyl)quinazolin-4(3H)-one(4f):** Yellow oil



(49.5 mg, 62% yield),  $R_f = 0.4$  (EA);  $^1\text{H NMR}$  (400 MHz,  $\text{CDCl}_3$ )  $\delta$  10.96 (s, 1H), 8.37 (s, 2H), 8.23 (d,  $J = 7.6$  Hz, 1H), 7.71 – 7.67 (m, 1H), 7.61 (d,  $J = 8.0$  Hz, 1H), 7.41 – 7.38 (m, 1H), 7.19 – 7.02 (m, 7H), 4.06 – 4.02 (m, 1H), 3.85 – 3.80 (m, 1H), 3.57 – 3.52 (m, 1H), 3.24 – 3.19 (m, 1H), 2.88 (t,  $J = 6.0$  Hz, 2H), 2.21 (dd,  $J = 14.0, 7.2$  Hz, 1H), 2.06 (dd,  $J = 9.6, 5.2$  Hz, 1H), 1.13 (d,  $J = 6.0$  Hz, 3H);  $^{13}\text{C NMR}$  (100 MHz,  $\text{CDCl}_3$ )  $\delta$  162.6, 155.0, 153.5, 149.7, 149.1, 142.9, 134.7, 128.8, 127.6, 127.1, 126.8, 126.6, 126.4, 123.4, 121.1, 73.9, 65.3, 46.9, 42.1, 36.3, 19.5 ppm; **HRMS** (ESI)  $m/z$ :  $[\text{M} + \text{H}]^+$  Calcd for  $\text{C}_{25}\text{H}_{26}\text{N}_3\text{O}_2$  400.2020; Found 400.2019.

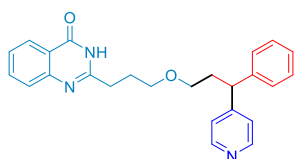

**2-(3-(3-Phenyl-3-(pyridin-4-yl)propoxy)propyl)quinazolin-4(3H)-one(4g):** Yellow oil (55.9 mg, 70% yield),  $R_f = 0.2$  (EA);  $^1\text{H NMR}$  (400 MHz,  $\text{CDCl}_3$ )  $\delta$  12.13 (s, 1H),  $\delta$  8.47 (d,  $J = 5.2$  Hz, 2H), 8.24 – 8.22 (m, 1H), 7.74 – 7.70 (m, 1H), 7.67 – 7.65 (m, 1H), 7.40 – 7.36 (m, 1H), 7.26 – 7.22 (m, 2H), 7.18 – 7.11 (m, 5H), 4.09 (t,  $J = 8.0$  Hz, 1H), 3.47 (t,  $J = 6.0$  Hz, 1H), 3.36 – 3.30 (m, 2H), 2.88 (t,  $J = 7.6$  Hz, 2H), 2.29 – 2.24 (m, 1H), 2.12 (t,  $J = 6.0$  Hz, 1H);  $^{13}\text{C NMR}$  (100 MHz,  $\text{CDCl}_3$ )  $\delta$  163.9, 156.5, 153.8, 149.5, 149.3, 142.3, 134.6, 128.6, 127.9, 127.0, 126.7, 126.3, 126.2, 123.3, 120.6, 70.0, 68.3, 46.6, 34.5, 32.9, 27.0 ppm; **HRMS** (ESI)  $m/z$ :  $[\text{M} + \text{H}]^+$  Calcd for  $\text{C}_{25}\text{H}_{26}\text{N}_3\text{O}_2$  400.2020; Found 400.2011.

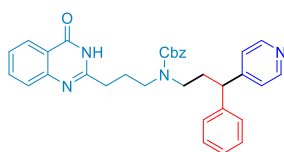

**Benzyl (3-(4-oxo-3,4-dihydroquinazolin-2-yl)propyl)(3-phenyl-3-(pyridin-4-yl)propyl)carbamate(4h):** Yellow oil (63.9 mg, 60% yield),  $R_f = 0.2$  (EA);  $^1\text{H NMR}$  (400 MHz,  $\text{CDCl}_3$ )  $\delta$  12.25 (s, 1H), 8.42 (d,  $J = 22.2$  Hz, 2H), 8.27 (d,  $J = 7.6$  Hz, 1H), 7.74 – 7.60 (m, 1H), 7.61 (d,  $J = 9.2$  Hz, 1H), 7.44 – 7.40 (m, 1H), 7.34 – 7.01 (m, 12H), 5.10 (s, 2H), 3.78 (t,  $J = 7.6$  Hz, 1H), 3.42 (t,  $J = 7.2$  Hz, 2H), 3.20 (t,  $J = 8.4$  Hz, 2H), 2.74 (t,  $J = 6.8$  Hz, 2H), 2.36 – 2.27 (m, 1H), 2.12 – 2.05 (m, 2H);  $^{13}\text{C NMR}$  (100 MHz,  $\text{CDCl}_3$ )  $\delta$  164.4, 164.0, 156.5, 155.9, 155.5, 150.0, 149.3, 147.0, 136.4, 136.1, 134.8, 128.5, 128.2, 128.0, 127.2, 126.6, 126.3, 122.5, 121.9, 120.7, 67.7, 49.7,

49.5, 46.9, 46.2, 32.5, 25.5 ppm; **HRMS** (ESI)  $m/z$ :  $[M + H]^+$  Calcd for  $C_{33}H_{33}N_4O_3$  533.2547; Found 533.2555.

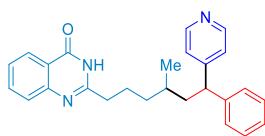

**2-(4-Methyl-6-phenyl-6-(pyridin-4-yl)hexyl)quinazolin-4(3H)-one(4i)**: Yellow oil (27.8 mg, 35% yield),  $R_f$  = 0.3 (EA);  **$^1H$  NMR** (400 MHz,  $CDCl_3$ )  $\delta$  12.41 (s, 1H), 8.37 (s, 2H), 8.17 (d,  $J$  = 7.6 Hz, 1H), 7.69 – 7.60 (m, 2H), 7.37 – 7.33 (m, 1H), 7.18 – 7.05 (m, 7H), 3.92 (t,  $J$  = 8.4 Hz, 1H), 2.67 (t,  $J$  = 4.4 Hz, 2H), 2.03 – 1.96 (m, 1H), 1.79 – 1.72 (m, 3H), 1.48 – 1.40 (m, 1H), 1.32 – 1.24 (m, 2H), 0.86 (d,  $J$  = 3.6 Hz, 2H);  **$^{13}C$  NMR** (100 MHz,  $CDCl_3$ )  $\delta$  164.6, 157.0, 154.6, 154.0, 149.8, 143.4, 134.9, 128.8, 128.1, 127.9, 127.3, 126.8, 126.5, 123.5, 120.6, 48.2, 42.2, 36.7, 36.1, 30.2, 24.8, 19.7 ppm; **HRMS** (ESI)  $m/z$ :  $[M + H]^+$  Calcd for  $C_{26}H_{28}N_3O$  398.2227; Found 398.2224.

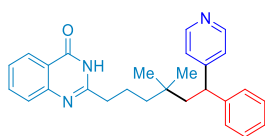

**2-(4,4-Dimethyl-6-phenyl-6-(pyridin-4-yl)hexyl)quinazolin-4(3H)-one(4j)**: Yellow oil (66.7 mg, 81% yield),  $R_f$  = 0.4 (EA);  **$^1H$  NMR** (400 MHz,  $CDCl_3$ )  $\delta$  12.08 (s, 1H), 8.37 (d,  $J$  = 4.0 Hz, 2H), 8.22 (d,  $J$  = 7.6 Hz, 1H), 7.71 (t,  $J$  = 8.4 Hz, 1H), 7.65 (d,  $J$  = 8.0 Hz, 1H), 7.42 – 7.38 (m, 1H), 7.18 – 7.08 (m, 7H), 3.96 (t,  $J$  = 6.4 Hz, 1H), 2.61 (t,  $J$  = 8.0 Hz, 2H), 2.10 – 2.00 (m, 2H), 1.76 (dd,  $J$  = 9.6, 6.4 Hz, 2H), 1.29 (t,  $J$  = 8.8 Hz, 2H), 0.75 (d,  $J$  = 4.0 Hz, 6H);  **$^{13}C$  NMR** (100 MHz,  $CDCl_3$ )  $\delta$  164.3, 156.8, 155.8, 149.6, 149.5, 144.6, 134.8, 128.7, 127.8, 127.3, 126.6, 126.4, 126.2, 123.2, 120.6, 47.4, 46.6, 42.1, 36.4, 34.1, 27.8, 22.2 ppm; **HRMS** (ESI)  $m/z$ :  $[M + H]^+$  Calcd for  $C_{27}H_{30}N_3O$  412.2383; Found 412.2381.

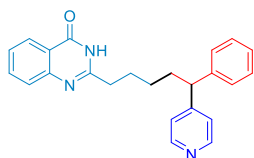

**2-(5-Phenyl-5-(pyridin-4-yl)pentyl)quinazolin-4(3H)-one(4k)**: Yellow oil (36.9 mg, 50% yield),  $R_f$  = 0.6 (EA);  **$^1H$  NMR** (400 MHz,  $CDCl_3$ )  $\delta$  12.07 (s, 1H), 8.39 (s, 2H), 8.13 (d,  $J$  = 8.0 Hz, 1H),

7.73 – 7.68 (m, 1H), 7.62 (d,  $J = 8.0$  Hz, 1H), 7.39 – 7.35 (m, 1H), 7.21 – 7.08 (m, 7H), 3.83 (t,  $J = 8.0$  Hz, 1H), 2.71 (t,  $J = 7.6$  Hz, 2H), 2.13 – 2.06 (m, 2H), 1.92 – 1.84 (m, 2H), 1.41 – 1.33 (m, 2H);  $^{13}\text{C}$  NMR (100 MHz,  $\text{CDCl}_3$ )  $\delta$  164.5, 156.6, 153.9, 149.6, 149.4, 142.8, 134.8, 128.6, 127.8, 127.1, 126.7, 126.3, 126.1, 123.2, 120.4, 50.4, 35.4, 34.4, 27.2, 27.2 ppm; HRMS (ESI)  $m/z$ :  $[\text{M} + \text{H}]^+$  Calcd for  $\text{C}_{24}\text{H}_{24}\text{N}_3\text{O}$  370.1914; Found 370.1908.

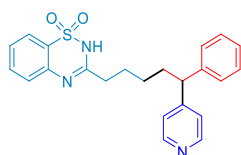

**3-(5-Phenyl-5-(pyridin-4-yl)pentyl)-2H-benzo[e][1,2,4]thiadiazine 1,1-dioxide(4l):** Yellow oil (49.4 mg, 61% yield),  $R_f = 0.5$  (EA);  $^1\text{H}$  NMR (400 MHz,  $\text{CDCl}_3$ )  $\delta$  12.07 (s, 1H), 8.35 (d,  $J = 4.4$  Hz, 2H), 7.79 (d,  $J = 7.6$  Hz, 1H), 7.39 – 7.35 (m, 1H), 7.26 – 7.21 (m, 3H), 7.16 – 7.11 (m, 6H), 3.81 (t,  $J = 7.6$  Hz, 1H), 2.44 (t,  $J = 7.6$  Hz, 2H), 1.99 – 1.93 (m, 2H), 1.78 – 1.69 (m, 2H), 1.25 – 1.22 (m, 2H);  $^{13}\text{C}$  NMR (100 MHz,  $\text{CDCl}_3$ )  $\delta$  160.6, 155.2, 148.9, 142.6, 135.5, 133.0, 128.9, 127.8, 127.0, 126.5, 124.1, 123.9, 121.3, 117.2, 50.5, 35.7, 34.3, 27.0, 26.2 ppm; HRMS (ESI)  $m/z$ :  $[\text{M} + \text{H}]^+$  Calcd for  $\text{C}_{23}\text{H}_{24}\text{N}_3\text{O}_2\text{S}$  406.1584; Found 406.1580.

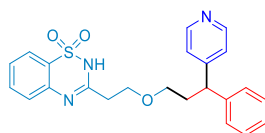

**3-(2-(3-Phenyl-3-(pyridin-4-yl)propoxy)ethyl)-2H-benzo[e][1,2,4]thiadiazine 1,1-dioxide(4m):** Yellow oil (50.5 mg, 60% yield),  $R_f = 0.2$  (EA);  $^1\text{H}$  NMR (400 MHz,  $\text{CDCl}_3$ )  $\delta$  10.36 (s, 1H), 8.47 (d,  $J = 6.4$  Hz, 2H), 7.95 – 7.92 (m, 1H), 7.51 – 7.46 (m, 1H), 7.40 – 7.35 (m, 1H), 7.32 – 7.28 (m, 2H), 7.24 – 7.16 (m, 5H), 6.97 (d,  $J = 7.6$  Hz, 1H), 4.07 (t,  $J = 7.6$  Hz, 1H), 3.75 (t,  $J = 5.6$  Hz, 2H), 3.45 (t,  $J = 6.4$  Hz, 2H), 2.76 (t,  $J = 6.0$  Hz, 2H), 2.36 – 2.31 (m, 2H).  $^{13}\text{C}$  NMR (100 MHz,  $\text{CDCl}_3$ )  $\delta$  158.5, 155.0, 148.7, 142.0, 135.1, 132.9, 128.8, 127.8, 127.0, 126.6, 124.2, 123.8, 121.5, 117.0, 68.5, 66.7, 46.6, 36.5, 34.3 ppm; HRMS (ESI)  $m/z$ :  $[\text{M} + \text{H}]^+$  Calcd for  $\text{C}_{23}\text{H}_{24}\text{N}_3\text{O}_3\text{S}$  422.1533; Found 422.1534.

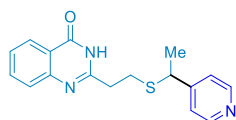

**2-(2-((1-(Pyridin-4-yl)ethyl)thio)ethyl)quinazolin-4(3H)-one(4n')**: Yellow oil (43.5 mg, 70% yield),  $R_f = 0.5$  (EA);  $^1\text{H NMR}$  (400 MHz,  $\text{CDCl}_3$ )  $\delta$  12.50 (s, 1H), 8.43 (d,  $J = 3.6$  Hz, 2H), 8.18 (d,  $J = 7.6$  Hz, 1H), 7.71 – 7.59 (m, 2H), 7.41 – 7.37 (m, 1H), 7.23 – 7.20 (m, 2H), 4.01 – 3.95 (m, 1H), 2.94 – 2.81 (m, 4H), 1.46 (d,  $J = 6.4$  Hz, 3H);  $^{13}\text{C NMR}$  (100 MHz,  $\text{CDCl}_3$ )  $\delta$  164.3, 154.6, 153.0, 149.8, 149.2, 134.8, 127.2, 126.6, 126.1, 122.4, 120.5, 43.0, 35.3, 28.2, 21.8 ppm; **HRMS** (ESI)  $m/z$ :  $[\text{M} + \text{H}]^+$  Calcd for  $\text{C}_{17}\text{H}_{18}\text{N}_3\text{OS}$  312.4026; Found 312.4025.

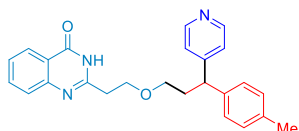

**2-(2-(3-(Pyridin-4-yl)-3-(p-tolyl)propoxy)ethyl)quinazolin-4(3H)-one(5a)**: Yellow oil (51.9 mg, 65% yield),  $R_f = 0.2$  (EA);  $^1\text{H NMR}$  (400 MHz,  $\text{CDCl}_3$ )  $\delta$  11.32 (s, 1H), 8.43 (d,  $J = 5.2$  Hz, 2H), 8.29 (d,  $J = 8.0$  Hz, 1H), 7.77 – 7.73 (m, 1H), 7.66 (d,  $J = 8.0$  Hz, 1H), 7.48 – 7.43 (m, 1H), 7.09 (d,  $J = 4.8$  Hz, 2H), 7.03 (s, 4H), 4.03 (t,  $J = 8.0$  Hz, 1H), 3.81 (t,  $J = 6.0$  Hz, 2H), 3.43 – 3.40 (m, 2H), 3.00 (t,  $J = 6.0$  Hz, 2H), 2.28 (t,  $J = 5.6$  Hz, 2H), 2.26 (s, 3H);  $^{13}\text{C NMR}$  (100 MHz,  $\text{CDCl}_3$ )  $\delta$  162.9, 154.8, 153.7, 149.6, 149.0, 139.2, 136.4, 134.6, 129.3, 127.6, 127.0, 126.5, 126.3, 123.1, 120.9, 68.7, 67.8, 46.2, 36.0, 34.3, 20.9 ppm; **HRMS** (ESI)  $m/z$ :  $[\text{M} + \text{H}]^+$  Calcd for  $\text{C}_{25}\text{H}_{26}\text{N}_3\text{O}_2$  400.2020; Found 400.2021.

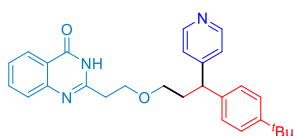

**2-(2-(3-(4-(Tert-butyl)phenyl)-3-(pyridin-4-yl)propoxy)ethyl)quinazolin-4(3H)-one(5b):**

Yellow oil (74.2 mg, 84% yield),  $R_f = 0.2$  (EA);  $^1\text{H NMR}$  (400 MHz,  $\text{CDCl}_3$ )  $\delta$  11.51 (s, 1H), 8.43 (s, 2H), 8.29 (d,  $J = 8.0$  Hz, 1H), 7.75 – 7.71 (m, 1H), 7.66 (d,  $J = 8.0$  Hz, 1H), 7.46 – 7.42 (m, 1H), 7.22 (d,  $J = 8.4$  Hz, 2H), 7.11 – 7.03 (m, 4H), 4.03 (t,  $J = 8.0$  Hz, 1H), 3.81 (t,  $J = 6.0$  Hz, 2H), 3.40 (t,  $J = 6.0$  Hz, 2H), 2.99 (t,  $J = 6.0$  Hz, 2H), 2.29 – 2.24 (m, 2H), 1.24 (s, 9H);  $^{13}\text{C NMR}$  (100 MHz,  $\text{CDCl}_3$ )  $\delta$  163.0, 154.9, 153.9, 149.5, 149.3, 149.0, 139.0, 134.6, 127.3, 127.0, 126.4, 126.3, 125.5, 123.2, 120.9, 68.7, 67.8, 46.2, 36.0, 34.4, 34.3, 31.2 ppm; **HRMS** (ESI)  $m/z$ :  $[\text{M} + \text{H}]^+$  Calcd for  $\text{C}_{28}\text{H}_{33}\text{N}_3\text{O}_2$  442.2489; Found 442.2479.

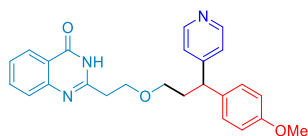

**2-(2-(3-(4-Methoxyphenyl)-3-(pyridin-4-yl)propoxy)ethyl)quinazolin-4(3H)-one(5c):** Yellow oil (65.6 mg, 79% yield),  $R_f = 0.2$  (EA);  $^1\text{H NMR}$  (400 MHz,  $\text{CDCl}_3$ )  $\delta$  11.71 (s, 1H), 8.41 (d,  $J = 5.2$  Hz, 2H), 8.27 (d,  $J = 6.4$  Hz, 1H), 7.74 – 7.69 (m, 1H), 7.65 (d,  $J = 8.0$  Hz, 1H), 7.46 – 7.38 (m, 1H), 7.05 – 6.99 (m, 4H), 6.72 (d,  $J = 8.8$  Hz, 2H), 3.99 (t,  $J = 8.0$  Hz, 1H), 3.81 (t,  $J = 5.2$  Hz, 2H), 3.68 (s, 3H), 3.38 – 3.35 (m, 2H), 2.99 (t,  $J = 6.0$  Hz, 2H), 2.24 – 2.18 (m, 2H);  $^{13}\text{C NMR}$  (100 MHz,  $\text{CDCl}_3$ )  $\delta$  163.2, 158.1, 154.8, 153.9, 149.4, 149.0, 134.5, 134.1, 128.6, 127.0, 126.3, 126.1, 123.0, 120.8, 113.9, 68.4, 67.7, 55.0, 45.6, 35.9, 34.3 ppm; **HRMS** (ESI)  $m/z$ :  $[\text{M} + \text{H}]^+$  Calcd for  $\text{C}_{25}\text{H}_{26}\text{N}_3\text{O}_3$  416.1969; Found 416.1957.

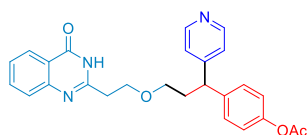

**4-(3-(2-(4-Oxo-3,4-dihydroquinazolin-2-yl)ethoxy)-1-(pyridin-4-yl)propyl)phenyl acetate(5d):** Yellow oil (77.2 mg, 87% yield),  $R_f = 0.2$  (EA);  $^1\text{H NMR}$  (400 MHz,  $\text{CDCl}_3$ )  $\delta$  10.68 (s, 1H), 8.47 (s, 2H), 8.28 (d,  $J = 7.6$  Hz, 1H), 7.77 – 7.73 (m, 1H), 7.66 (d,  $J = 6.8$  Hz, 1H), 7.49 – 7.45 (m, 1H), 7.21 – 7.13 (m, 4H), 7.01 – 6.97 (m, 2H), 4.10 (t,  $J = 8.0$  Hz, 1H), 3.78 (t,  $J = 5.6$  Hz, 2H), 3.44 (t,  $J = 6.0$  Hz, 2H), 2.96 (t,  $J = 6.0$  Hz, 2H), 2.35 – 2.30 (m, 2H), 2.26 (s, 3H);  $^{13}\text{C NMR}$  (100 MHz,  $\text{CDCl}_3$ )  $\delta$  169.4, 162.4, 154.8, 153.2, 149.7, 149.4, 149.0, 139.7, 134.7, 128.8, 127.1, 126.6, 126.4, 123.2, 121.8, 121.0, 68.8, 67.9, 46.3, 35.9, 34.4, 21.1. ppm; **HRMS** (ESI)  $m/z$ :  $[\text{M} + \text{H}]^+$  Calcd for  $\text{C}_{26}\text{H}_{26}\text{N}_3\text{O}_4$  444.1918; Found 444.1924.

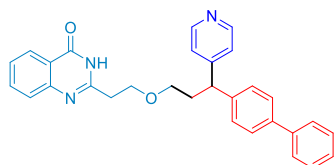

**2-(2-(3-([1,1'-Biphenyl]-4-yl)-3-(pyridin-4-yl)propoxy)ethyl)quinazolin-4(3H)-one(5e):** Yellow oil (55.4 mg, 60% yield),  $R_f = 0.2$  (EA);  $^1\text{H NMR}$  (400 MHz,  $\text{CDCl}_3$ )  $\delta$  11.23 (s, 1H), 8.47 (d,  $J =$

5.2 Hz, 2H), 8.31 (d,  $J = 8.0$  Hz, 1H), 7.77 – 7.67 (m, 2H), 7.52 – 7.46 (m, 5H), 7.41 – 7.29 (m, 3H), 7.21 (d,  $J = 7.6$  Hz, 2H), 7.15 (d,  $J = 5.2$  Hz, 2H), 4.13 (t,  $J = 8.0$  Hz, 1H), 3.83 (t,  $J = 6.0$  Hz, 2H), 3.46 (t,  $J = 6.4$  Hz, 2H), 3.01 (t,  $J = 6.0$  Hz, 2H), 2.37 – 2.32 (m, 2H);  $^{13}\text{C}$  NMR (100 MHz,  $\text{CDCl}_3$ )  $\delta$  162.9, 154.8, 153.4, 149.7, 149.1, 141.3, 140.4, 139.7, 134.7, 128.7, 128.2, 127.4, 127.2, 127.1, 126.9, 126.5, 126.3, 123.2, 120.9, 68.6, 67.8, 46.3, 36.0, 34.3 ppm; **HRMS** (ESI)  $m/z$ :  $[\text{M} + \text{H}]^+$  Calcd for  $\text{C}_{30}\text{H}_{28}\text{N}_3\text{O}_2$  462.2176; Found 462.2171.

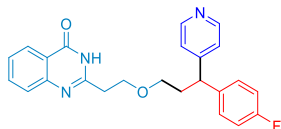

**2-(2-(3-(4-Fluorophenyl)-3-(pyridin-4-yl)propoxy)ethyl)quinazolin-4(3H)-one(5f):** Yellow oil (61.3 mg, 76% yield),  $R_f = 0.2$  (EA);  $^1\text{H}$  NMR (400 MHz,  $\text{CDCl}_3$ )  $\delta$  11.42 (s, 1H), 8.44 (s, 2H), 8.28 (d,  $J = 8.0$  Hz, 1H), 7.77 – 7.73 (m, 1H), 7.66 (d,  $J = 8.4$  Hz, 1H), 7.47 – 7.43 (m, 1H), 7.09 – 7.06 (m, 4H), 6.90 (t,  $J = 8.4$  Hz, 2H), 4.07 (t,  $J = 7.6$  Hz, 1H), 3.82 (t,  $J = 6.0$  Hz, 2H), 3.48 – 3.32 (m, 2H), 3.00 (t,  $J = 5.6$  Hz, 2H), 2.29 – 2.22 (m, 2H);  $^{13}\text{C}$  NMR (100 MHz,  $\text{CDCl}_3$ )  $\delta$  163.4, 161.8 (d,  $J_{\text{C-F}} = 244.3$  Hz), 155.0, 153.6, 149.9, 149.3, 138.2 (d,  $J_{\text{C-F}} = 3.2$  Hz), 135.0, 129.5 (d,  $J_{\text{C-F}} = 7.7$  Hz), 127.3, 126.8, 126.5, 123.3, 121.1, 115.7 (d,  $J_{\text{C-F}} = 21.2$  Hz), 68.6, 68.1, 46.0, 36.2, 34.7;  $^{19}\text{F}$  NMR (376 MHz,  $\text{CDCl}_3$ )  $\delta$  -115.67 (s, 1F) ppm; **HRMS** (ESI)  $m/z$ :  $[\text{M} + \text{H}]^+$  Calcd for  $\text{C}_{24}\text{H}_{23}\text{FN}_3\text{O}_2$  426.1589; Found 426.1584.

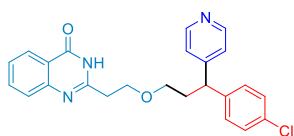

**2-(2-(3-(4-Chlorophenyl)-3-(pyridin-4-yl)propoxy)ethyl)quinazolin-4(3H)-one(5g):** Yellow oil (68.8 mg, 82% yield),  $R_f = 0.2$  (EA);  $^1\text{H}$  NMR (400 MHz,  $\text{CDCl}_3$ )  $\delta$  11.04 (s, 1H), 8.45 (s, 2H), 8.28 (d,  $J = 7.6$  Hz, 1H), 7.78 – 7.74 (m, 1H), 7.66 (d,  $J = 8.0$  Hz, 1H), 7.48 – 7.44 (m, 1H), 7.20 (d,  $J = 8.4$  Hz, 2H), 7.07 (d,  $J = 8.4$  Hz, 4H), 4.08 (t,  $J = 8.0$  Hz, 1H), 3.81 (t,  $J = 6.0$  Hz, 2H), 3.47 – 3.34 (m, 2H), 3.00 (t,  $J = 6.0$  Hz, 2H), 2.31 – 2.24 (m, 2H);  $^{13}\text{C}$  NMR (100 MHz,  $\text{CDCl}_3$ )  $\delta$  162.9, 154.7, 153.0, 149.6, 149.0, 140.6, 134.7, 132.6, 129.1, 128.8, 127.0, 126.5, 126.2, 123.0, 120.8, 68.3, 67.8, 45.8, 35.9, 34.2 ppm; **HRMS** (ESI)  $m/z$ :  $[\text{M} + \text{Na}]^+$  Calcd for  $\text{C}_{24}\text{H}_{22}\text{ClN}_3\text{O}_2\text{Na}$  442.1293;

Found 442.1297.

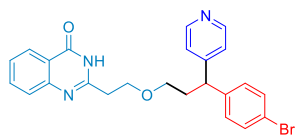

**2-(2-(3-(4-Bromophenyl)-3-(pyridin-4-yl)propoxy)ethyl)quinazolin-4(3H)-one(5h):** Yellow oil (56.6 mg, 61% yield),  $R_f = 0.2$  (EA);  $^1\text{H NMR}$  (400 MHz,  $\text{CDCl}_3$ )  $\delta$  11.54 (s, 1H), 8.43 (d,  $J = 5.2$  Hz, 2H), 8.28 (d,  $J = 8.0$  Hz, 1H), 7.71 – 7.67 (m, 1H), 7.66 (d,  $J = 8.0$  Hz, 1H), 7.41 – 7.37 (m, 1H), 7.32 (d,  $J = 8.0$  Hz, 2H), 7.03 (d,  $J = 5.2$  Hz, 2H), 6.98 (d,  $J = 8.0$  Hz, 2H), 4.03 (t,  $J = 7.6$  Hz, 1H), 3.82 (t,  $J = 6.0$  Hz, 2H), 3.34 – 3.30 (m, 2H), 3.00 (t,  $J = 5.6$  Hz, 2H), 2.21 – 2.13 (m, 2H);  $^{13}\text{C NMR}$  (100 MHz,  $\text{CDCl}_3$ )  $\delta$  163.3, 154.9, 152.9, 149.9, 149.3, 141.5, 134.9, 131.9, 129.7, 127.3, 126.7, 126.4, 123.2, 121.0, 120.8, 68.4, 68.0, 46.1, 36.2, 34.3 ppm; **HRMS** (ESI)  $m/z$ :  $[\text{M} + \text{H}]^+$  Calcd for  $\text{C}_{24}\text{H}_{23}\text{BrN}_3\text{O}_2$  464.0968; Found 464.0977.

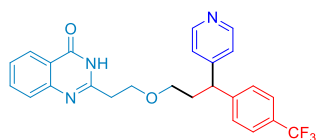

**2-(2-(3-(Pyridin-4-yl)-3-(4-(trifluoromethyl)phenyl)propoxy)ethyl)quinazolin-4(3H)-one(5i):** Yellow oil (45.3 mg, 50% yield),  $R_f = 0.2$  (EA);  $^1\text{H NMR}$  (400 MHz,  $\text{CDCl}_3$ )  $\delta$  11.24 (s, 1H), 8.39 (d,  $J = 3.6$  Hz, 2H), 8.21 (d,  $J = 8.0$  Hz, 1H), 7.71 – 7.67 (m, 1H), 7.60 (d,  $J = 8.0$  Hz, 1H), 7.40 (d,  $J = 8.0$  Hz, 3H), 7.18 (d,  $J = 7.6$  Hz, 2H), 7.01 (d,  $J = 5.2$  Hz, 2H), 4.10 (t,  $J = 8.0$  Hz, 1H), 3.76 (t,  $J = 6.0$  Hz, 2H), 3.37 – 3.31 (m, 2H), 2.94 (t,  $J = 6.0$  Hz, 2H), 2.27 – 2.20 (m, 2H);  $^{13}\text{C NMR}$  (100 MHz,  $\text{CDCl}_3$ )  $\delta$  163.1, 154.9, 152.6, 149.9, 149.2, 146.4, 134.9, 129.3 (q,  $J_{\text{C-F}} = 31.7$  Hz), 128.3, 127.3, 126.8, 126.4, 125.8 (d,  $J_{\text{C-F}} = 2.8$  Hz), 125.4, 124.5 (d,  $J_{\text{C-F}} = 253.1$  Hz), 121.0, 68.4, 68.1, 46.5, 36.1, 34.3;  $^{19}\text{F NMR}$  (376 MHz,  $\text{CDCl}_3$ )  $\delta$  -62.52 (s, 3F) ppm; **HRMS** (ESI)  $m/z$ :  $[\text{M} + \text{H}]^+$  Calcd for  $\text{C}_{25}\text{H}_{23}\text{F}_3\text{N}_3\text{O}_2$  454.1737; Found 454.1728.

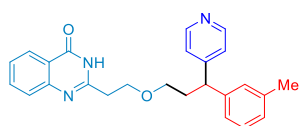

**2-(2-(3-(Pyridin-4-yl)-3-(m-tolyl)propoxy)ethyl)quinazolin-4(3H)-one(5j):** Yellow oil (61.1 mg,

76% yield),  $R_f = 0.2$  (EA);  $^1\text{H NMR}$  (400 MHz,  $\text{CDCl}_3$ )  $\delta$  11.27 (s, 1H), 8.44 (d,  $J = 4.0$  Hz, 2H), 8.29 (d,  $J = 7.2$  Hz, 1H), 7.76 – 7.65 (m, 2H), 7.48 – 7.43 (m, 1H), 7.14 – 7.10 (m, 3H), 6.99 – 6.93 (m, 3H), 4.03 (t,  $J = 7.6$  Hz, 1H), 3.81 (t,  $J = 6.0$  Hz, 2H), 3.42 (t,  $J = 6.0$  Hz, 2H), 2.99 (t,  $J = 5.6$  Hz, 2H), 2.32 – 2.27 (m, 2H), 2.24 (s, 3H);  $^{13}\text{C NMR}$  (100 MHz,  $\text{CDCl}_3$ )  $\delta$  163.1, 155.0, 153.7, 149.8, 149.2, 142.4, 138.5, 134.8, 128.7, 128.7, 127.7, 127.2, 126.6, 126.5, 124.9, 123.3, 121.1, 68.9, 68.0, 46.7, 36.2, 34.5, 21.5 ppm; **HRMS** (ESI)  $m/z$ :  $[\text{M} + \text{Na}]^+$  Calcd for  $\text{C}_{25}\text{H}_{25}\text{N}_3\text{O}_2\text{Na}$  422.1839; Found 422.1834.

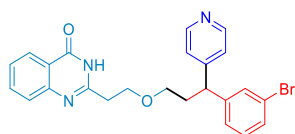

**2-(2-(3-(3-Bromophenyl)-3-(pyridin-4-yl)propoxy)ethyl)quinazolin-4(3H)-one (5k):** Yellow oil (66.6 mg, 72% yield),  $R_f = 0.2$  (EA);  $^1\text{H NMR}$  (400 MHz,  $\text{CDCl}_3$ )  $\delta$  11.43 (s, 1H), 8.43 (s, 2H), 8.27 (d,  $J = 7.6$  Hz, 1H), 7.75 – 7.64 (m, 2H), 7.46 – 7.42 (m, 1H), 7.28 – 7.24 (m, 2H), 7.04 (s, 4H), 4.04 (t,  $J = 8.0$  Hz, 1H), 3.81 (t,  $J = 6.4$  Hz, 2H), 3.38 (t,  $J = 6.4$  Hz, 2H), 2.99 (t,  $J = 5.6$  Hz, 2H), 2.26 – 2.21 (m, 2H);  $^{13}\text{C NMR}$  (100 MHz,  $\text{CDCl}_3$ )  $\delta$  163.2, 154.7, 152.4, 149.8, 149.1, 144.7, 134.7, 130.7, 130.2, 129.9, 127.1, 126.5, 126.3, 123.0, 122.7, 120.8, 68.2, 67.8, 46.1, 36.0, 34.1 ppm; **HRMS** (ESI)  $m/z$ :  $[\text{M} + \text{H}]^+$  Calcd for  $\text{C}_{24}\text{H}_{23}\text{BrN}_3\text{O}_2$  464.0967; Found 464.0967.

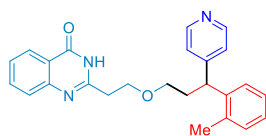

**2-(2-(3-(3-(o-tolyl)-3-(pyridin-4-yl)propoxy)ethyl)quinazolin-4(3H)-one (5l):** Yellow oil (52.2 mg, 65% yield),  $R_f = 0.2$  (EA);  $^1\text{H NMR}$  (400 MHz,  $\text{CDCl}_3$ )  $\delta$  11.36 (s, 1H), 8.42 (s, 2H), 8.27 (d,  $J = 7.6$  Hz, 1H), 7.76 – 7.65 (m, 2H), 7.47 – 7.42 (m, 1H), 7.21 – 7.14 (m, 2H), 7.11 – 7.05 (m, 4H), 4.28 (t,  $J = 7.6$  Hz, 1H), 3.84 (t,  $J = 5.2$  Hz, 2H), 3.44 (t,  $J = 6.4$  Hz, 2H), 3.01 (t,  $J = 6.0$  Hz, 2H), 2.31 – 2.26 (m, 2H), 2.12 (s, 3H);  $^{13}\text{C NMR}$  (100 MHz,  $\text{CDCl}_3$ )  $\delta$  163.1, 154.7, 153.2, 149.5, 149.1, 140.2, 136.4, 134.6, 130.7, 127.1, 126.7, 126.50, 126.45, 126.3, 126.2, 123.4, 120.9, 68.6, 67.8, 42.1, 36.0, 34.8, 19.6 ppm; **HRMS** (ESI)  $m/z$ :  $[\text{M} + \text{H}]^+$  Calcd for  $\text{C}_{25}\text{H}_{26}\text{N}_3\text{O}_2$  400.2020; Found 400.2012.



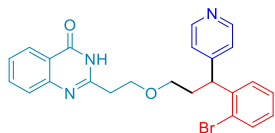

**2-(2-(3-(2-Bromophenyl)-3-(pyridin-4-yl)propoxy)ethyl)quinazolin-4(3H)-one(5m):** Yellow oil (56.6 mg, 61% yield),  $R_f = 0.2$  (EA);  $^1\text{H NMR}$  (400 MHz,  $\text{CDCl}_3$ )  $\delta$  10.79 (s, 1H), 8.46 (d,  $J = 6.0$  Hz, 2H), 8.15 (d,  $J = 8.0$  Hz, 1H), 7.51 – 7.44 (m, 2H), 7.26 – 7.21 (m, 4H), 7.14 (d,  $J = 6.4$  Hz, 2H), 7.07 – 7.03 (m, 1H), 4.63 (t,  $J = 7.6$  Hz, 1H), 3.81 (t,  $J = 6.0$  Hz, 2H), 3.46 (t,  $J = 6.4$  Hz, 2H), 2.97 (t,  $J = 6.4$  Hz, 2H), 2.35 – 2.30 (m, 2H).;  $^{13}\text{C NMR}$  (100 MHz,  $\text{CDCl}_3$ )  $\delta$  162.6, 154.8, 152.0, 149.9, 149.2, 145.7, 141.6, 133.3, 128.6, 128.4, 128.1, 127.9, 126.9, 126.2, 125.3, 123.4, 118.7, 68.8, 68.0, 45.1, 36.2, 34.5.ppm; **HRMS** (ESI)  $m/z$ :  $[\text{M} + \text{H}]^+$  Calcd for  $\text{C}_{24}\text{H}_{23}\text{BrN}_3\text{O}_2$  464.0968; Found 464.0971.

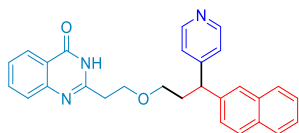

**2-(2-(3-(Naphthalen-2-yl)-3-(pyridin-4-yl)propoxy)ethyl)quinazolin-4(3H)-one(5n):** Yellow oil (40.9 mg, 47% yield),  $R_f = 0.2$  (EA);  $^1\text{H NMR}$  (400 MHz,  $\text{CDCl}_3$ )  $\delta$  10.79 (s, 1H), 8.48 (s, 2H), 8.30 (d,  $J = 7.6$  Hz, 1H), 7.77 – 7.65 (m, 6H), 7.49 – 7.42 (m, 3H), 7.22 (d,  $J = 6.4$  Hz, 3H), 4.29 (t,  $J = 7.6$  Hz, 1H), 3.81 – 3.78 (m, 2H), 3.48 – 3.44 (m, 2H), 2.99 (t,  $J = 5.6$  Hz, 2H), 2.46 – 2.41 (m, 2H);  $^{13}\text{C NMR}$  (100 MHz,  $\text{CDCl}_3$ )  $\delta$  163.0, 155.1, 154.0, 149.6, 149.3, 139.7, 135.0, 133.6, 132.6, 128.8, 127.9, 127.8, 127.4, 126.8, 126.61, 126.59, 126.5, 126.3, 126.1, 123.7, 121.3, 69.0, 68.2, 47.0, 36.3, 34.4 ppm; **HRMS** (ESI)  $m/z$ :  $[\text{M} + \text{H}]^+$  Calcd for  $\text{C}_{28}\text{H}_{26}\text{N}_3\text{O}_2$  436.2020; Found 436.2023.

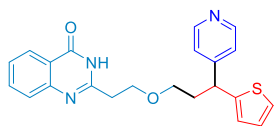

**2-(2-(3-(Pyridin-4-yl)-3-(thiophen-2-yl)propoxy)ethyl)quinazolin-4(3H)-one(5o):** Yellow oil (70.5 mg, 90% yield),  $R_f = 0.2$  (EA);  $^1\text{H NMR}$  (400 MHz,  $\text{CDCl}_3$ )  $\delta$  11.51 (s, 1H), 8.46 (d,  $J = 4.8$  Hz, 2H), 8.28 (d,  $J = 6.8$  Hz, 1H), 7.76 – 7.71 (m, 1H), 7.66 (d,  $J = 8.0$  Hz, 1H), 7.46 – 7.42 (m, 1H), 7.14 – 7.10 (m, 3H), 6.86 – 6.84 (m, 1H), 6.77 (d,  $J = 3.6$  Hz, 1H), 4.34 (t,  $J = 7.8$  Hz, 1H), 3.83 (t,

$J = 5.9$  Hz, 2H), 3.46 – 3.40 (m, 2H), 3.01 (t,  $J = 5.9$  Hz, 2H), 2.35 – 2.23 (m, 2H);  $^{13}\text{C}$  NMR (100 MHz,  $\text{CDCl}_3$ )  $\delta$  163.2, 154.7, 152.9, 149.6, 149.1, 145.9, 134.6, 127.0, 126.7, 126.5, 126.2, 124.6, 124.1, 122.9, 120.8, 67.8, 42.1, 36.1, 36.0 ppm; **HRMS** (ESI)  $m/z$ :  $[\text{M} + \text{H}]^+$  Calcd for  $\text{C}_{22}\text{H}_{22}\text{N}_3\text{O}_2\text{S}$  392.1427; Found 392.1427.

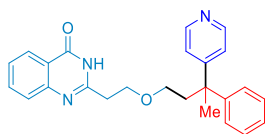

**2-(2-(3-Phenyl-3-(pyridin-4-yl)butoxy)ethyl)quinazolin-4(3H)-one(5p):** Yellow oil (72.7 mg, 91% yield),  $R_f = 0.2$  (EA);  $^1\text{H}$  NMR (400 MHz,  $\text{CDCl}_3$ )  $\delta$  11.38 (s, 1H), 8.55 (d,  $J = 3.6$  Hz, 2H), 8.36 (d,  $J = 6.8$  Hz, 1H), 7.85 – 7.81 (m, 1H), 7.74 (d,  $J = 8.0$  Hz, 1H), 7.56 – 7.52 (m, 1H), 7.36 – 7.26 (m, 3H), 7.21 – 7.15 (m, 4H), 3.84 (t,  $J = 6.0$  Hz, 2H), 3.46 – 3.36 (m, 2H), 3.03 (t,  $J = 6.0$  Hz, 2H), 2.54 – 2.50 (m, 2H), 1.70 (s, 3H);  $^{13}\text{C}$  NMR (100 MHz,  $\text{CDCl}_3$ )  $\delta$  162.7, 158.4, 154.7, 149.5, 149.0, 146.8, 134.6, 128.3, 127.04, 126.95, 126.44, 126.37, 126.3, 122.3, 121.0, 68.3, 67.8, 44.9, 34.0, 36.0, 27.2 ppm; **HRMS** (ESI)  $m/z$ :  $[\text{M} + \text{H}]^+$  Calcd for  $\text{C}_{25}\text{H}_{26}\text{N}_3\text{O}_2$  400.2020; Found 400.2019.

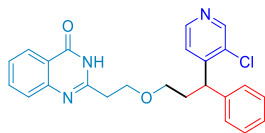

**2-(2-(3-(3-Chloropyridin-4-yl)-3-phenylpropoxy)ethyl)quinazolin-4(3H)-one(6a):** Yellow oil (62.9 mg, 75% yield),  $R_f = 0.2$  (EA);  $^1\text{H}$  NMR (400 MHz,  $\text{CDCl}_3$ )  $\delta$  11.17 (s, 1H), 8.45 (s, 1H), 8.36 (d,  $J = 5.2$  Hz, 1H), 8.27 (d,  $J = 7.6$  Hz, 1H), 7.79 – 7.70 (m, 1H), 7.66 (d,  $J = 8.4$  Hz, 1H), 7.46 – 7.42 (m, 1H), 7.26 – 7.16 (m, 6H), 4.55 (t,  $J = 7.6$  Hz, 1H), 3.83 (t,  $J = 6.0$  Hz, 2H), 3.47 – 3.43 (m, 2H), 2.99 (t,  $J = 6.0$  Hz, 2H), 2.32 – 2.27 (m, 2H);  $^{13}\text{C}$  NMR (100 MHz,  $\text{CDCl}_3$ )  $\delta$  163.1, 154.8, 150.6, 149.6, 149.1, 147.9, 140.8, 134.7, 128.7, 128.2, 127.2, 127.0, 126.5, 126.4, 123.0, 121.0, 68.7, 67.9, 42.9, 36.1, 34.2 ppm; **HRMS** (ESI)  $m/z$ :  $[\text{M} + \text{H}]^+$  Calcd for  $\text{C}_{24}\text{H}_{23}\text{ClN}_3\text{O}_2$  420.1473; Found 420.1473.

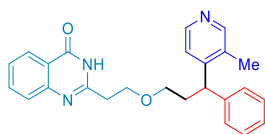

**2-(2-(3-(3-Methylpyridin-4-yl)-3-phenylpropoxy)ethyl)quinazolin-4(3H)-one(6b):** Yellow oil (67.9 mg, 85% yield),  $R_f$  = 0.2 (EA);  $^1\text{H NMR}$  (400 MHz,  $\text{CDCl}_3$ )  $\delta$  11.80 (s, 1H), 8.38 (d,  $J$  = 5.2 Hz, 1H), 8.27 (d,  $J$  = 6.4 Hz, 2H), 7.75 – 7.71 (m, 1H), 7.66 (d,  $J$  = 7.6 Hz, 1H), 7.45 – 7.41 (m, 1H), 7.19 – 7.05 (m, 6H), 4.21 (t,  $J$  = 8.0 Hz, 1H), 3.85 (t,  $J$  = 6.0 Hz, 2H), 3.44 – 3.38 (m, 2H), 3.01 (t,  $J$  = 6.0 Hz, 2H), 2.26 – 2.21 (m, 2H), 2.05 (s, 3H);  $^{13}\text{C NMR}$  (100 MHz,  $\text{CDCl}_3$ )  $\delta$  163.5, 155.0, 151.5, 150.8, 149.3, 147.5, 141.9, 134.8, 132.3, 128.6, 128.3, 127.2, 126.7, 126.6, 126.4, 121.4, 121.0, 68.6, 68.0, 42.6, 36.2, 34.9, 16.5 ppm; **HRMS** (ESI)  $m/z$ :  $[\text{M} + \text{H}]^+$  Calcd for  $\text{C}_{25}\text{H}_{26}\text{N}_3\text{O}_2$  400.2020; Found 400.2012.

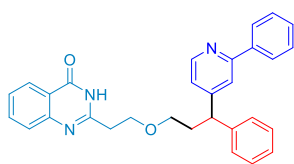

**2-(2-(3-Phenyl-3-(2-phenylpyridin-4-yl)propoxy)ethyl)quinazolin-4(3H)-one(6c):** Yellow oil (37.8 mg, 41% yield),  $R_f$  = 0.2 (EA);  $^1\text{H NMR}$  (400 MHz,  $\text{CDCl}_3$ )  $\delta$  10.48 (s, 1H), 8.53 (d,  $J$  = 4.8 Hz, 1H), 8.27 (d,  $J$  = 8.0 Hz, 1H), 7.90 (d,  $J$  = 7.2 Hz, 2H), 7.75 – 7.71 (m, 1H), 7.64 – 7.59 (m, 2H), 7.46 – 7.36 (m, 4H), 7.26 – 7.18 (m, 5H), 7.10 (d,  $J$  = 5.2 Hz, 1H), 4.17 (t,  $J$  = 8.0 Hz, 1H), 3.77 (t,  $J$  = 5.6 Hz, 2H), 3.46 (t,  $J$  = 6.0 Hz, 2H), 2.95 (t,  $J$  = 6.0 Hz, 2H), 2.44 – 2.37 (m, 2H).  $^{13}\text{C NMR}$  (100 MHz,  $\text{CDCl}_3$ )  $\delta$  162.3, 157.6, 154.8, 154.3, 149.6, 149.0, 142.3, 139.1, 134.7, 129.0, 128.9, 128.7, 127.9, 127.13, 127.06, 127.0, 126.7, 126.5, 121.6, 121.1, 120.3, 69.1, 67.9, 47.2, 36.0, 34.5 ppm; **HRMS** (ESI)  $m/z$ :  $[\text{M} + \text{H}]^+$  Calcd for  $\text{C}_{30}\text{H}_{28}\text{N}_3\text{O}_2$  462.2176; Found 462.2174.

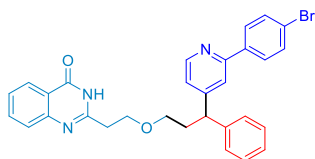

**2-(2-(3-(2-(4-Bromophenyl)pyridin-4-yl)-3-phenylpropoxy)ethyl)quinazolin-4(3H)-one(6d):** Yellow oil (46.5 mg, 43% yield),  $R_f$  = 0.2 (EA);  $^1\text{H NMR}$  (400 MHz,  $\text{CDCl}_3$ )  $\delta$  10.42 (s, 1H), 8.49 (d,  $J$  = 5.2 Hz, 1H), 8.25 (d,  $J$  = 6.4 Hz, 1H), 7.77 – 7.69 (m, 3H), 7.61 (d,  $J$  = 8.0 Hz, 1H), 7.54 – 7.41 (m, 3H), 7.26 – 7.16 (m, 6H), 7.08 (d,  $J$  = 3.2 Hz, 1H), 4.15 (t,  $J$  = 8.0 Hz, 1H), 3.75 (t,  $J$  = 5.6 Hz, 2H), 3.46 – 3.42 (m, 2H), 2.93 (t,  $J$  = 6.0 Hz, 2H), 2.40 – 2.34 (m, 2H);  $^{13}\text{C NMR}$  (100 MHz,  $\text{CDCl}_3$ )  $\delta$  162.3, 156.5, 154.8, 154.2, 149.9, 149.0, 142.2, 138.2, 134.7, 131.8, 128.8, 128.5, 127.8,

127.1, 127.0, 126.6, 126.4, 123.3, 121.7, 121.1, 119.9, 69.0, 67.9, 47.1, 36.0, 34.4 ppm; **HRMS** (ESI)  $m/z$ :  $[M + H]^+$  Calcd for  $C_{30}H_{27}BrN_3O_2$  540.1281; Found 540.1305.

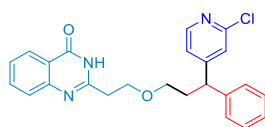

**2-(2-(3-(2-Chloropyridin-4-yl)-3-phenylpropoxy)ethyl)quinazolin-4(3H)-one (6e):** Yellow oil (40.2 mg, 48% yield),  $R_f$  = 0.2 (EA);  **$^1H$  NMR** (400 MHz,  $CDCl_3$ )  $\delta$  10.71 (s, 1H), 8.33 (d,  $J$  = 8.0 Hz, 1H), 8.25 (d,  $J$  = 4.8 Hz, 1H), 7.83 – 7.79 (m, 1H), 7.71 (d,  $J$  = 8.4 Hz, 1H), 7.54 – 7.50 (m, 1H), 7.31 – 7.19 (m, 6H), 7.10 (d,  $J$  = 4.8 Hz, 1H), 4.14 (t,  $J$  = 8.0 Hz, 1H), 3.83 (t,  $J$  = 6.0 Hz, 2H), 3.51 – 3.44 (m, 2H), 3.04 (t,  $J$  = 5.2 Hz, 2H), 2.39 – 2.34 (m, 2H);  **$^{13}C$  NMR** (100 MHz,  $CDCl_3$ )  $\delta$  162.7, 156.8, 154.8, 151.8, 149.7, 141.5, 134.8, 129.0, 127.9, 127.2, 127.1, 126.7, 126.4, 123.4, 122.1, 121.0, 68.6, 67.9, 46.6, 36.0, 34.3 ppm; **HRMS** (ESI)  $m/z$ :  $[M + Na]^+$  Calcd for  $C_{24}H_{22}ClN_3O_2Na$  442.1293; Found 442.1298.

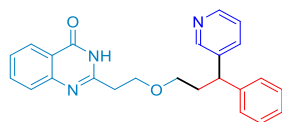

**2-(2-(3-Phenyl-3-(pyridin-3-yl)propoxy)ethyl)quinazolin-4(3H)-one (6f):** Yellow oil (32.4 mg, 42% yield),  $R_f$  = 0.3 (EA);  **$^1H$  NMR** (400 MHz,  $CDCl_3$ )  $\delta$  10.98 (s, 1H), 8.33 (d,  $J$  = 5.2 Hz, 1H), 8.20 (d,  $J$  = 6.8 Hz, 2H), 7.70 – 7.58 (m, 2H), 7.41 – 7.36 (m, 1H), 7.19 – 7.02 (m, 7H), 4.16 (t,  $J$  = 8.0 Hz, 1H), 3.77 (t,  $J$  = 6.0 Hz, 2H), 3.40 – 3.34 (m, 2H), 2.93 (t,  $J$  = 6.0 Hz, 2H), 2.26 – 2.19 (m, 2H);  **$^{13}C$  NMR** (100 MHz,  $CDCl_3$ )  $\delta$  156.9, 154.6, 153.2, 152.9, 148.9, 140.0, 134.6, 129.0, 128.0, 127.5, 127.0, 126.5, 126.3, 122.1, 121.0, 120.9, 116.0, 68.6, 67.9, 45.4, 36.0, 34.3 ppm; **HRMS** (ESI)  $m/z$ :  $[M + H]^+$  Calcd for  $C_{24}H_{24}N_3O_2$  386.1863; Found 386.1874.

## 11. $^1\text{H}$ NMR and $^{13}\text{C}$ NMR Spectra of Materials and Products

$^1\text{H}$  NMR (400 MHz,  $\text{DMSO}-d_6$ ) and  $^{13}\text{C}$  NMR (100 MHz,  $\text{DMSO}-d_6$ ) spectra of product **1b**

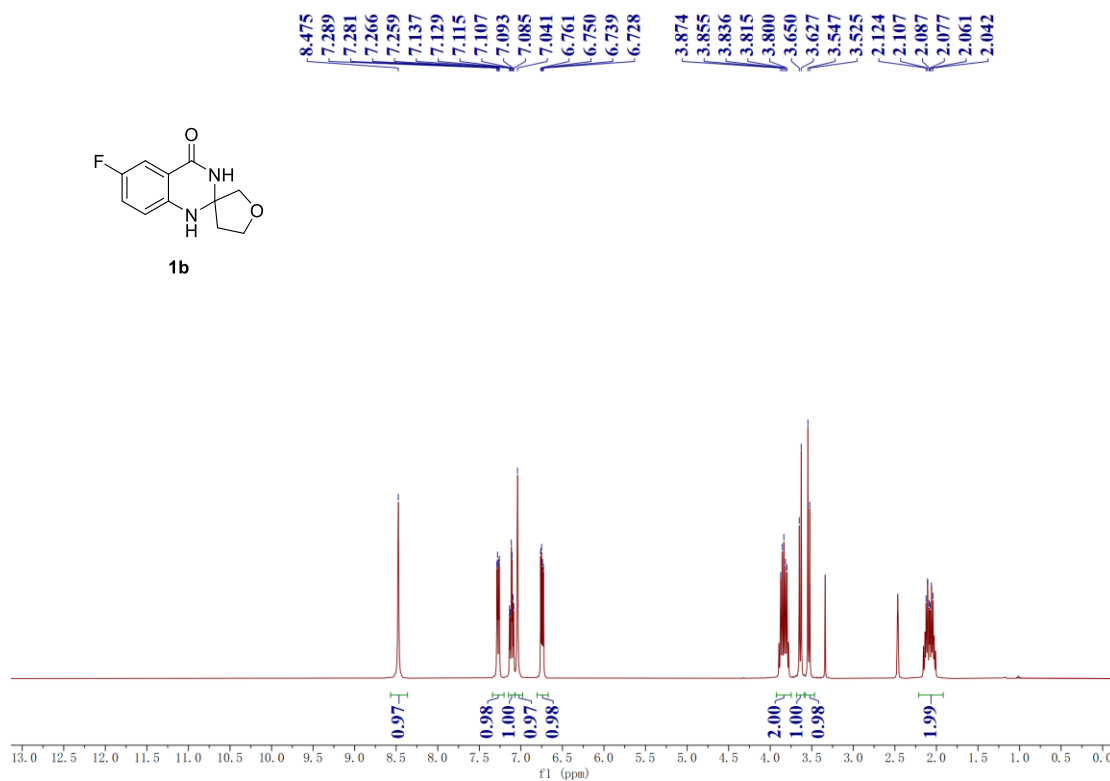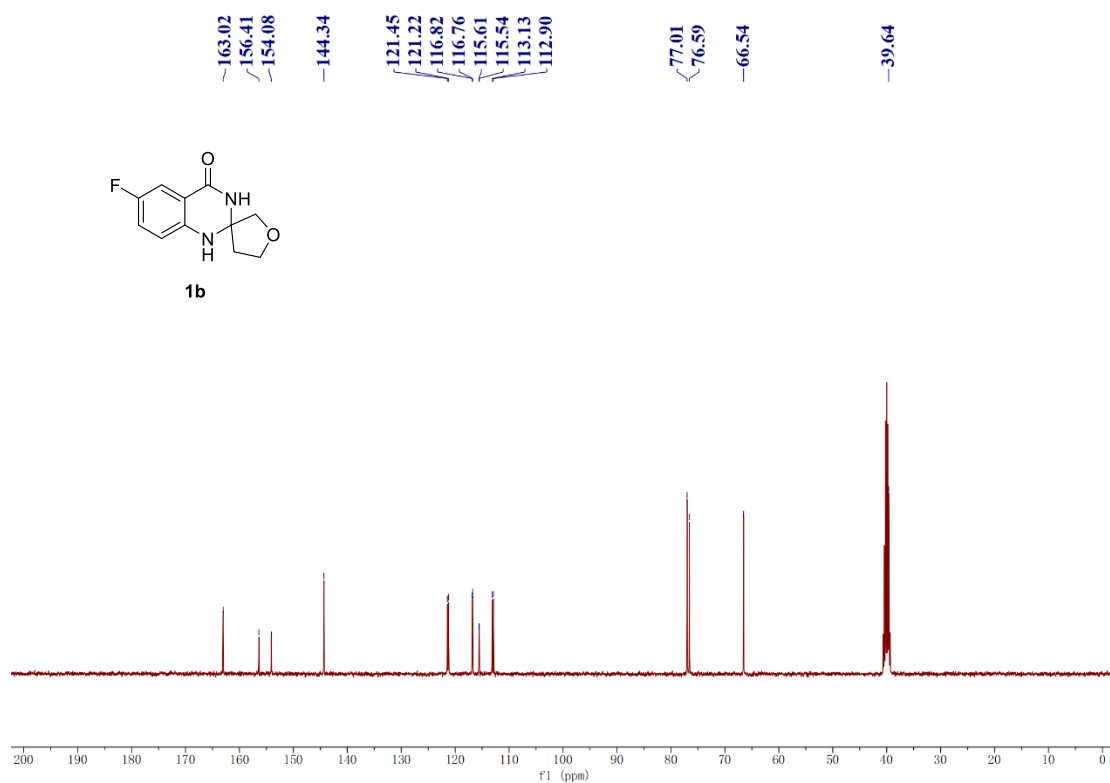

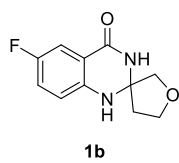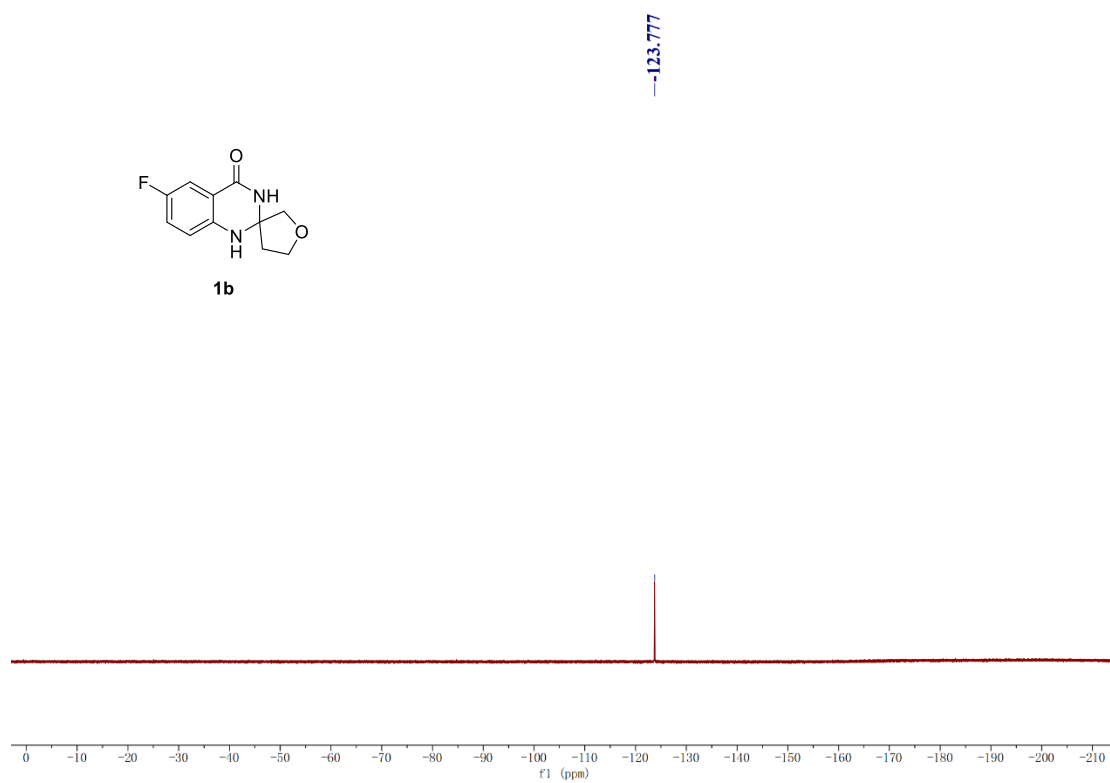

$^1\text{H}$  NMR (400 MHz,  $\text{DMSO-}d_6$ ) and  $^{13}\text{C}$  NMR (100 MHz,  $\text{DMSO-}d_6$ ) spectra of product **1c**

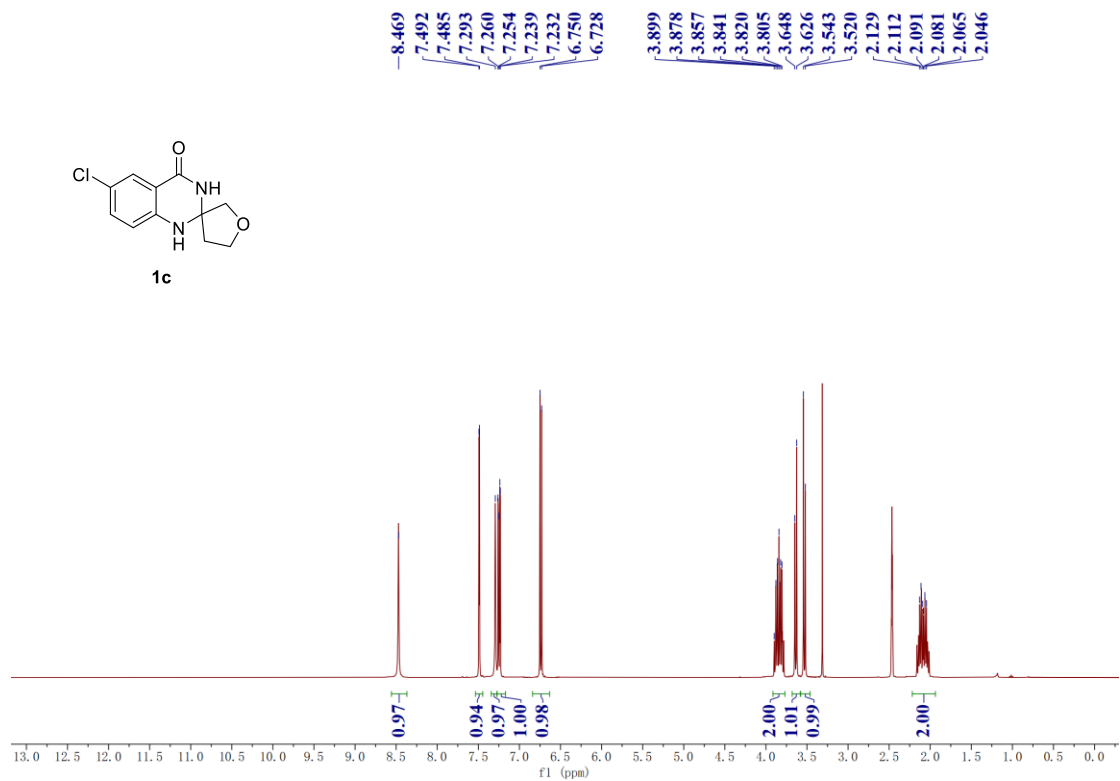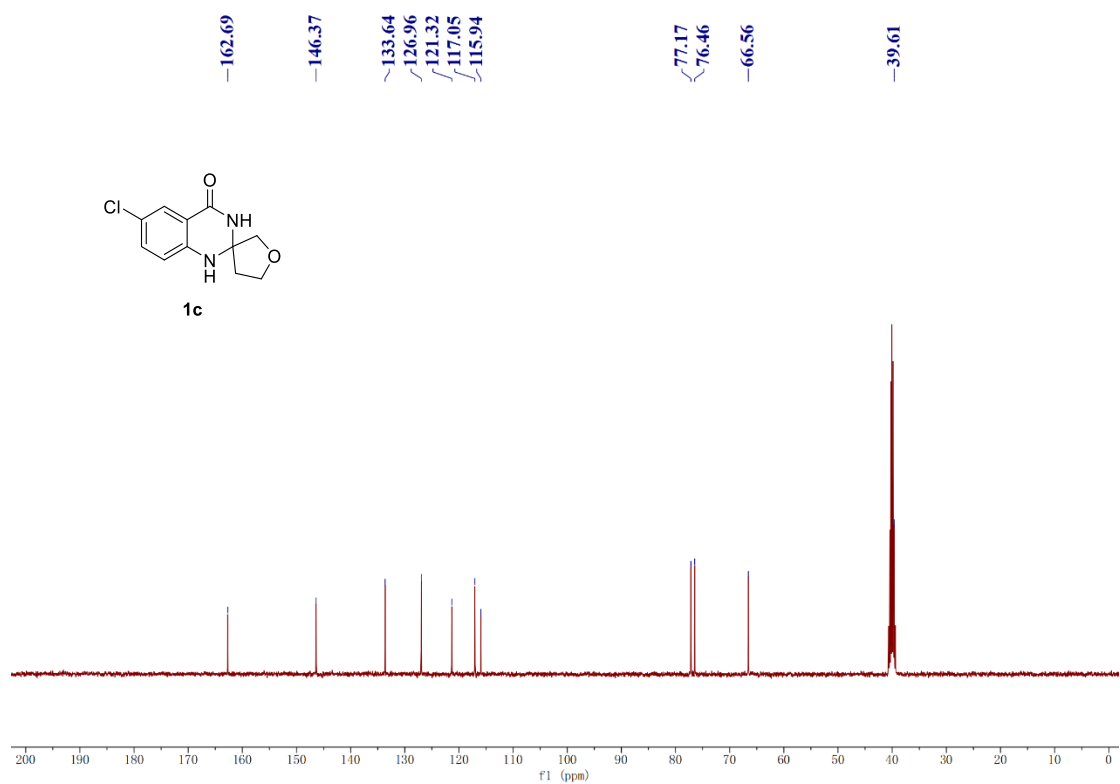

$^1\text{H}$  NMR (400 MHz,  $\text{DMSO-}d_6$ ) and  $^{13}\text{C}$  NMR (100 MHz,  $\text{DMSO-}d_6$ ) spectra of product **1d**

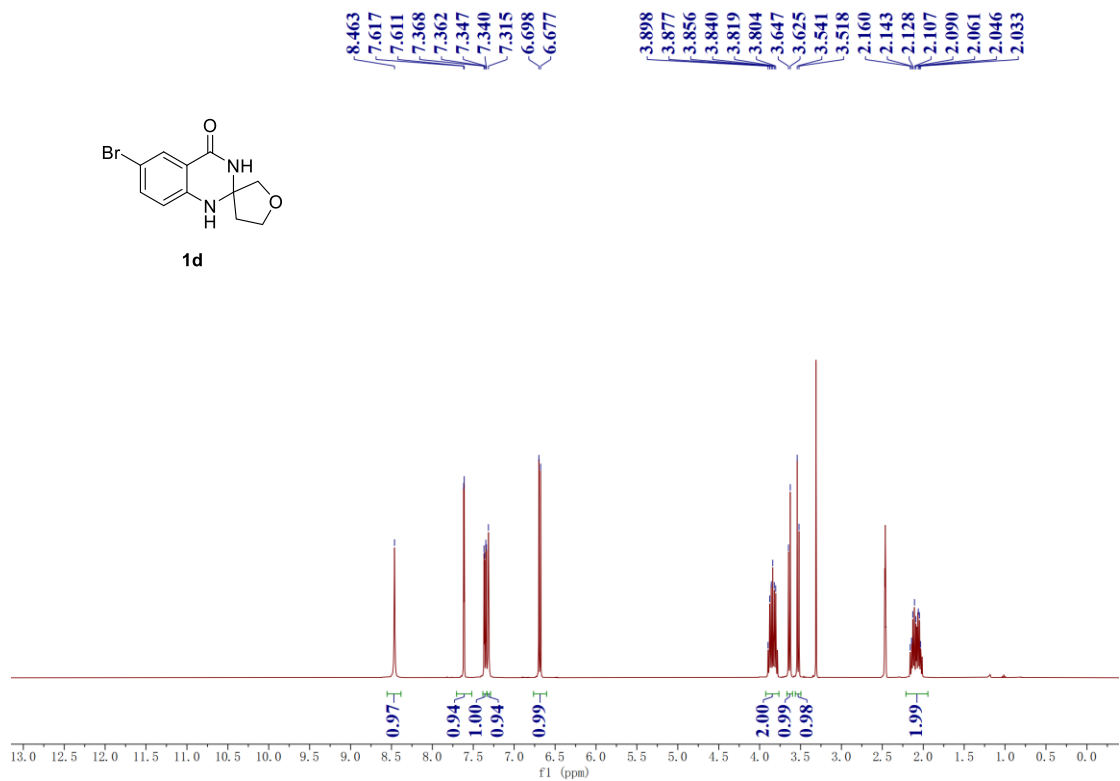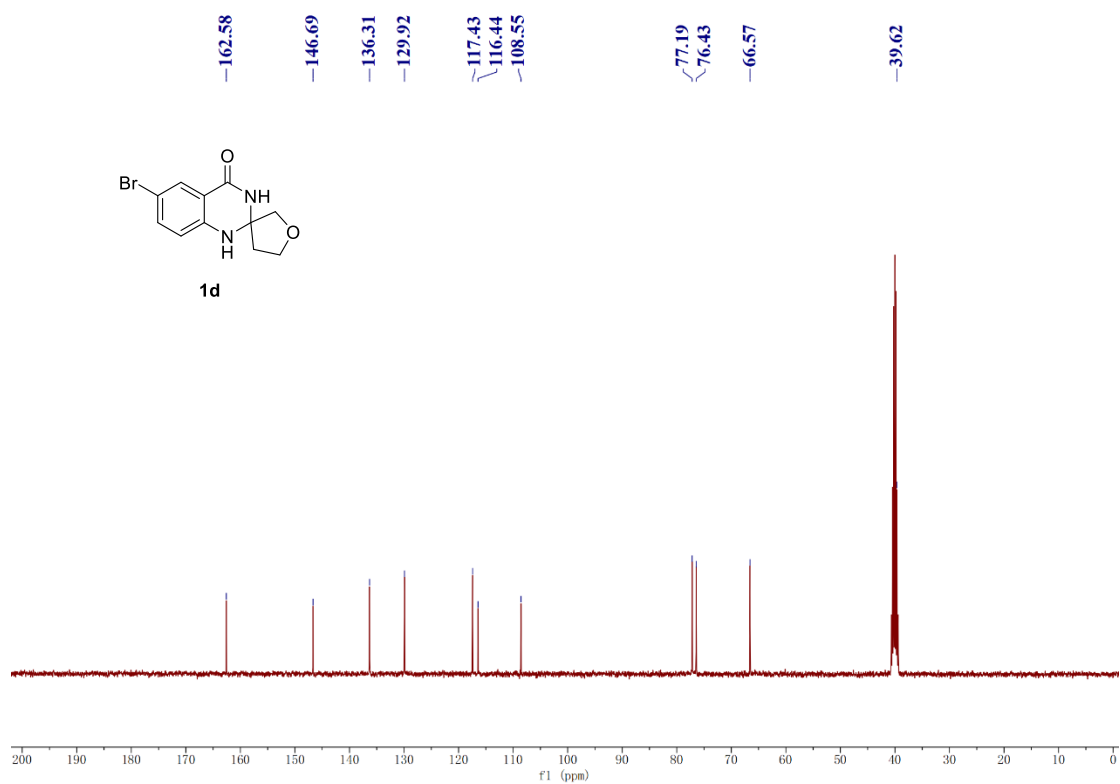



$^1\text{H}$  NMR (400 MHz,  $\text{DMSO-}d_6$ ) and  $^{13}\text{C}$  NMR (100 MHz,  $\text{DMSO-}d_6$ ) spectra of product **1e**

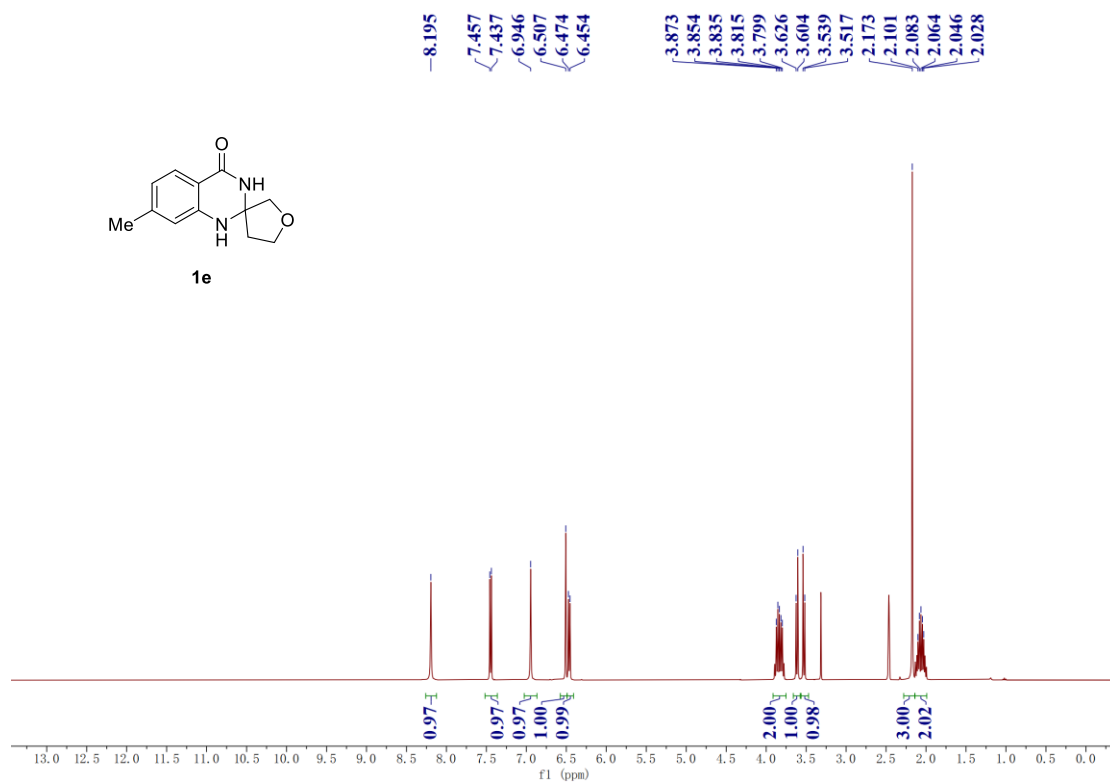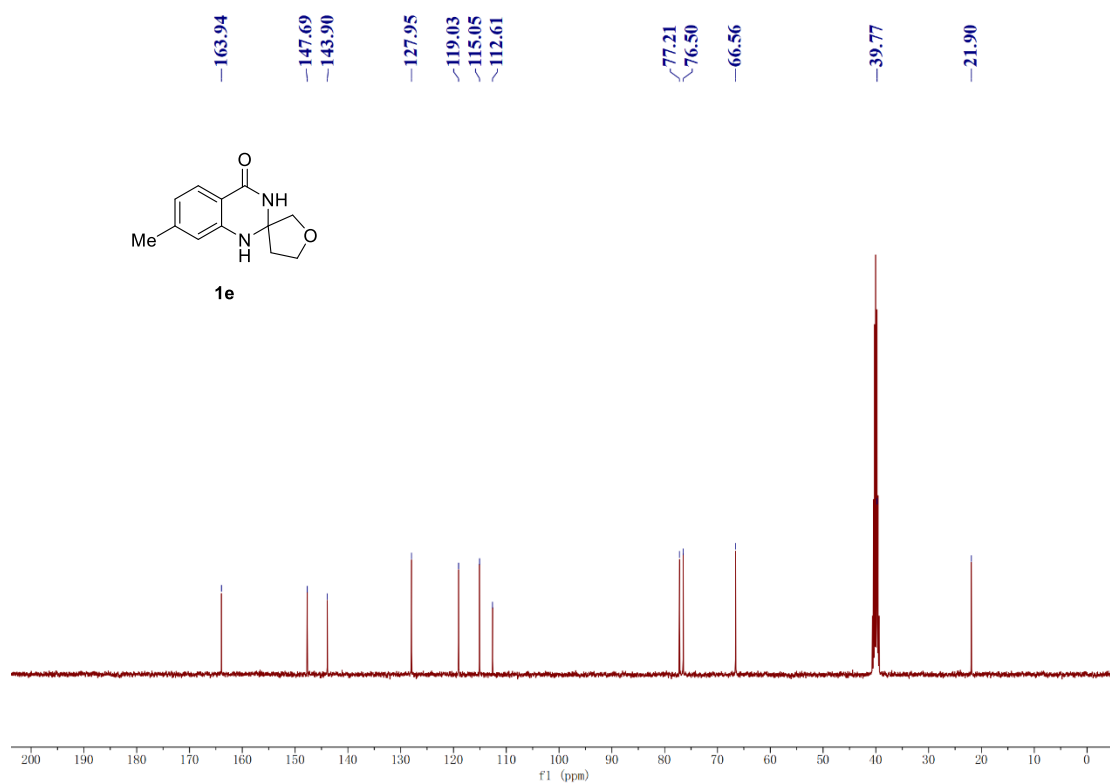

$^1\text{H}$  NMR (400 MHz,  $\text{DMSO}-d_6$ ) and  $^{13}\text{C}$  NMR (100 MHz,  $\text{DMSO}-d_6$ ) spectra of product **11**

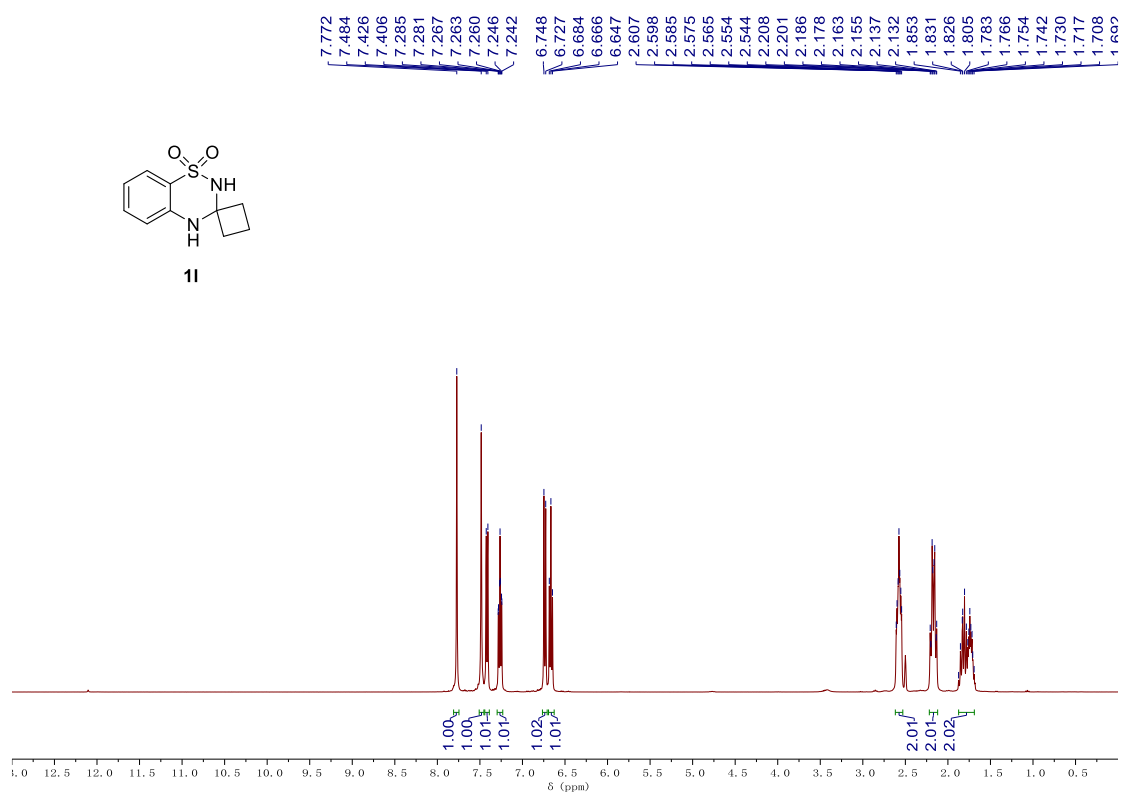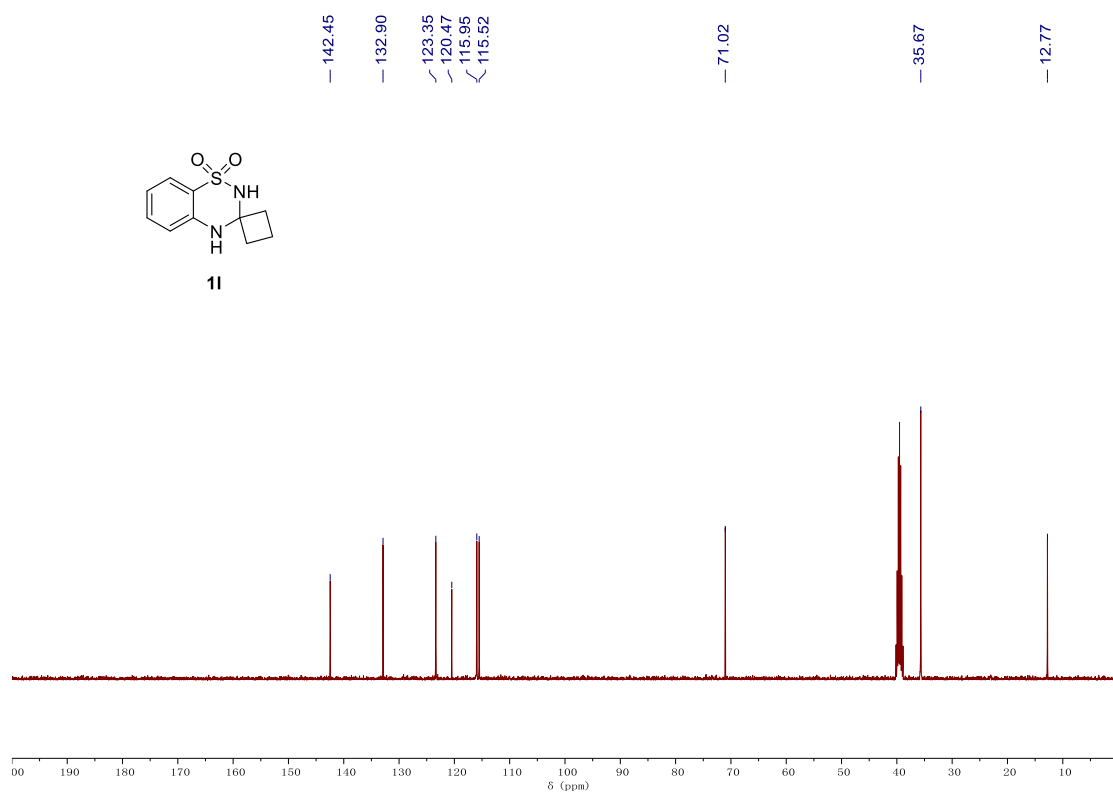

$^1\text{H}$  NMR (400 MHz,  $\text{DMSO-}d_6$ ) and  $^{13}\text{C}$  NMR (100 MHz,  $\text{DMSO-}d_6$ ) spectra of product **1m**

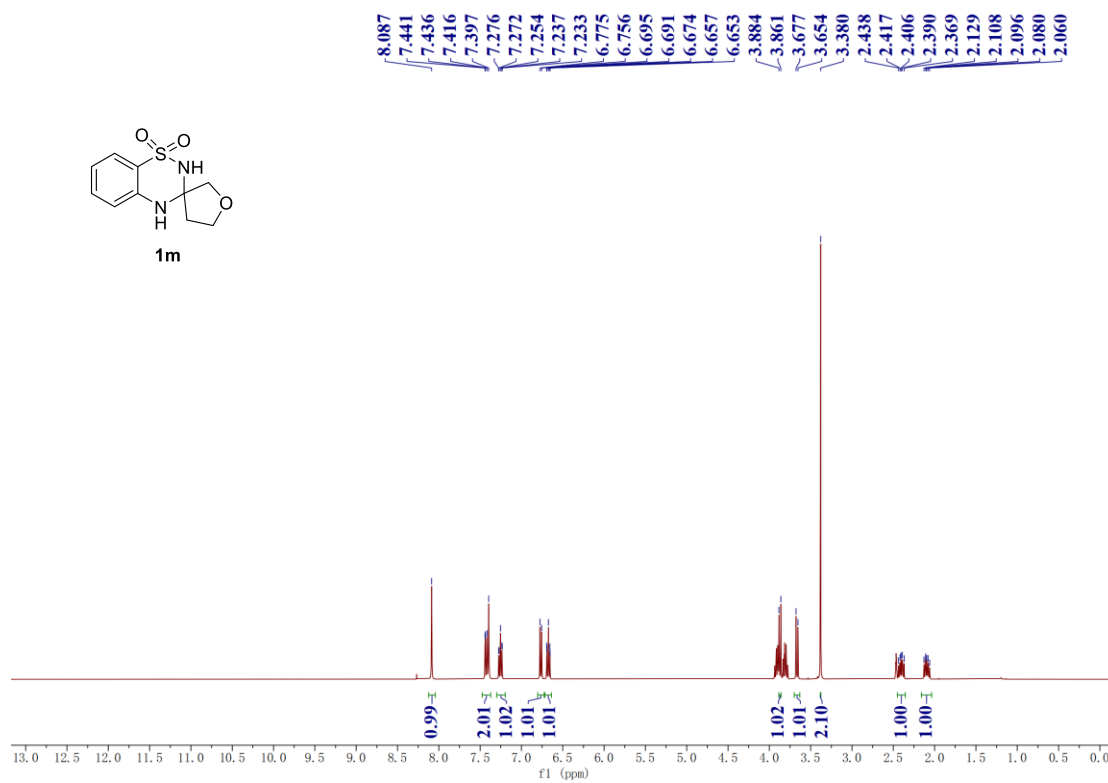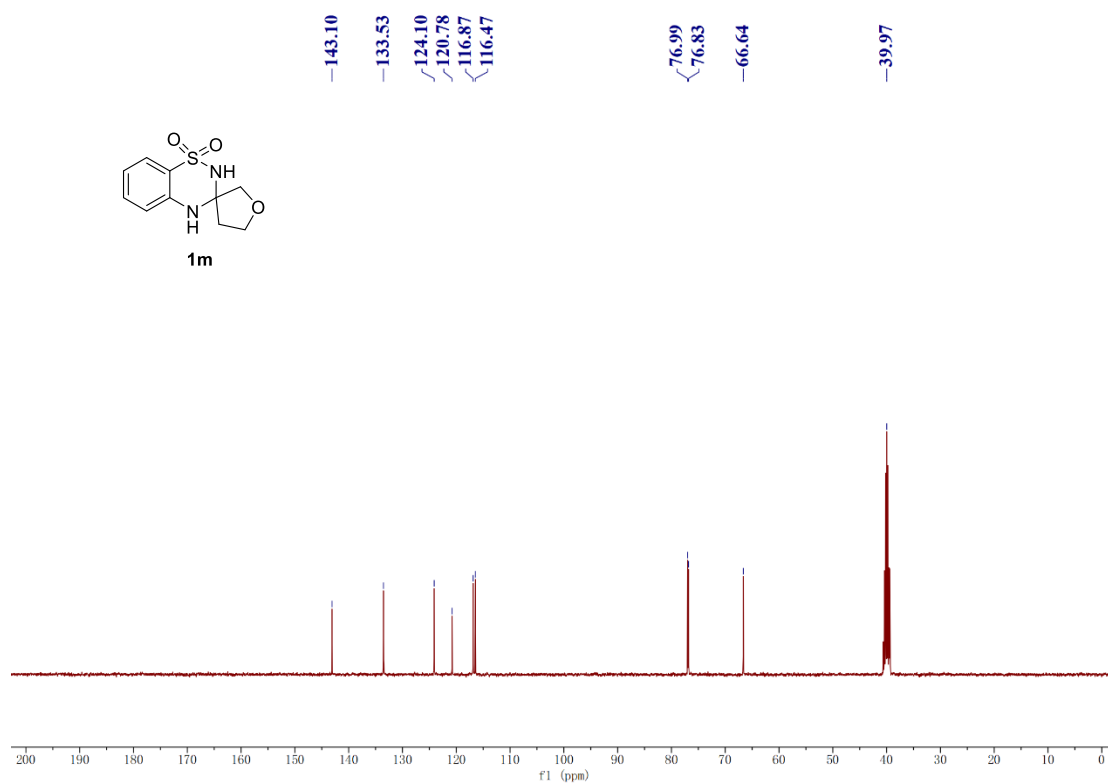

$^1\text{H}$  NMR (400 MHz,  $\text{CDCl}_3$ ) and  $^{13}\text{C}$  NMR (100 MHz,  $\text{CDCl}_3$ ) spectra of product **4a**

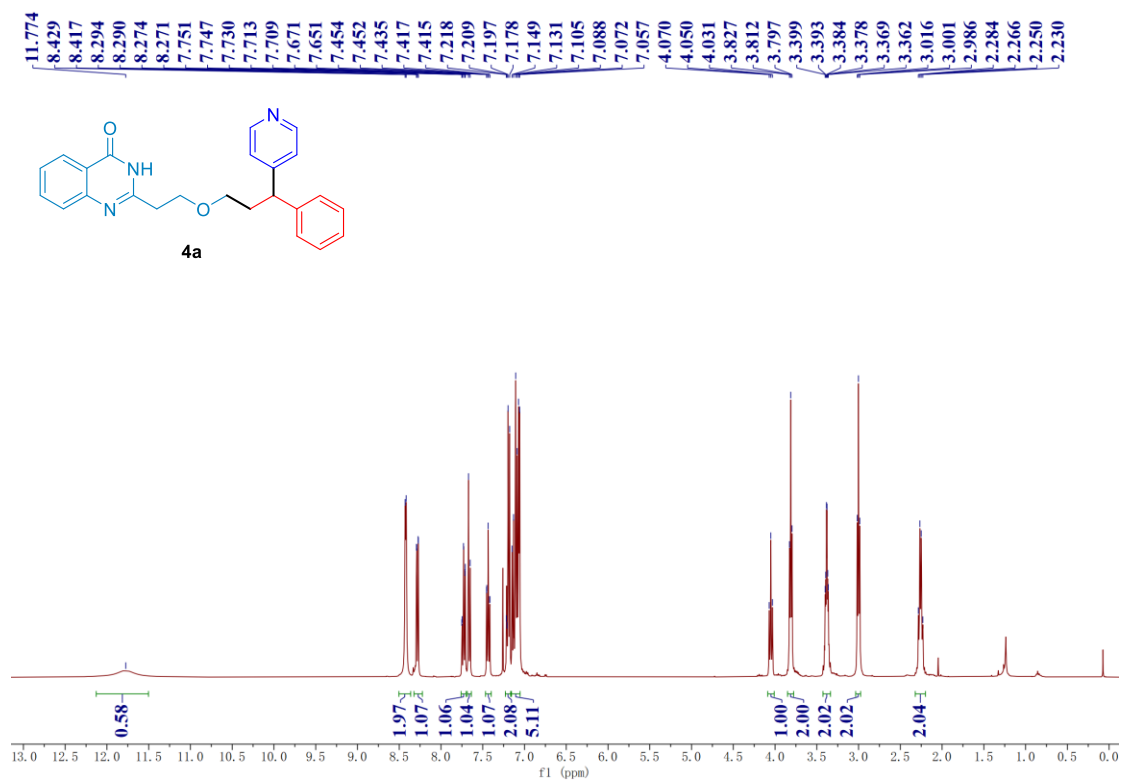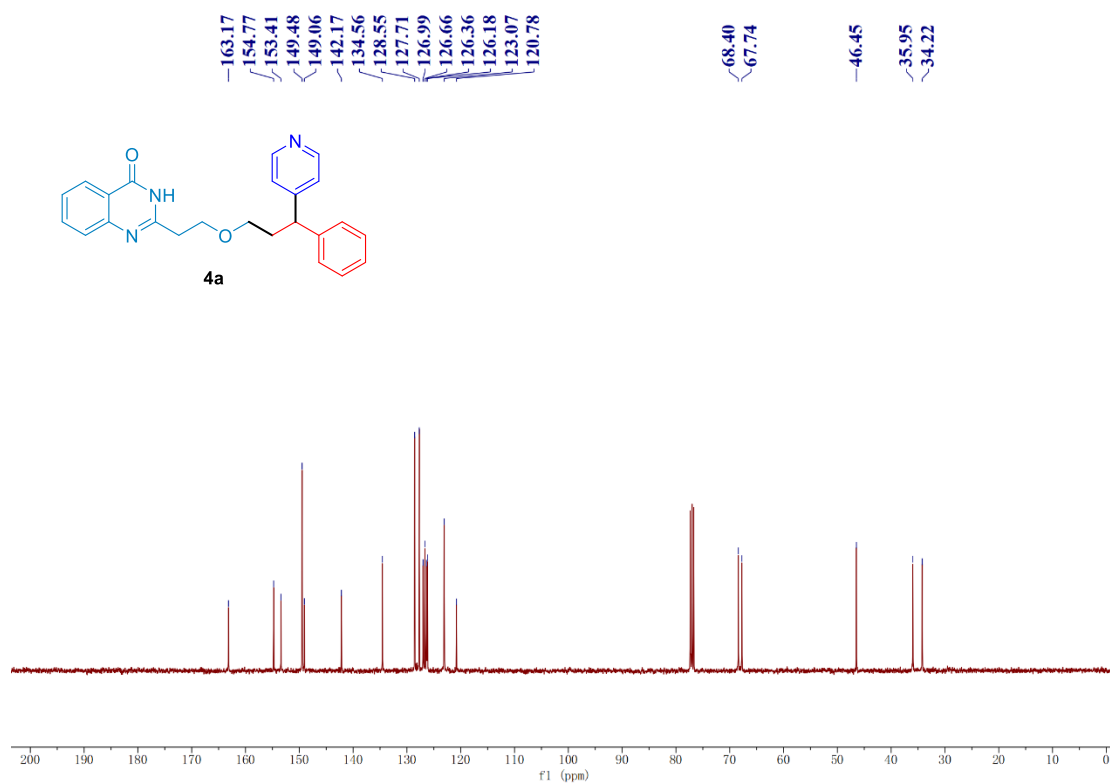

$^1\text{H}$  NMR (400 MHz,  $\text{CDCl}_3$ ) and  $^{13}\text{C}$  NMR (100 MHz,  $\text{CDCl}_3$ ) spectra of product **4b**

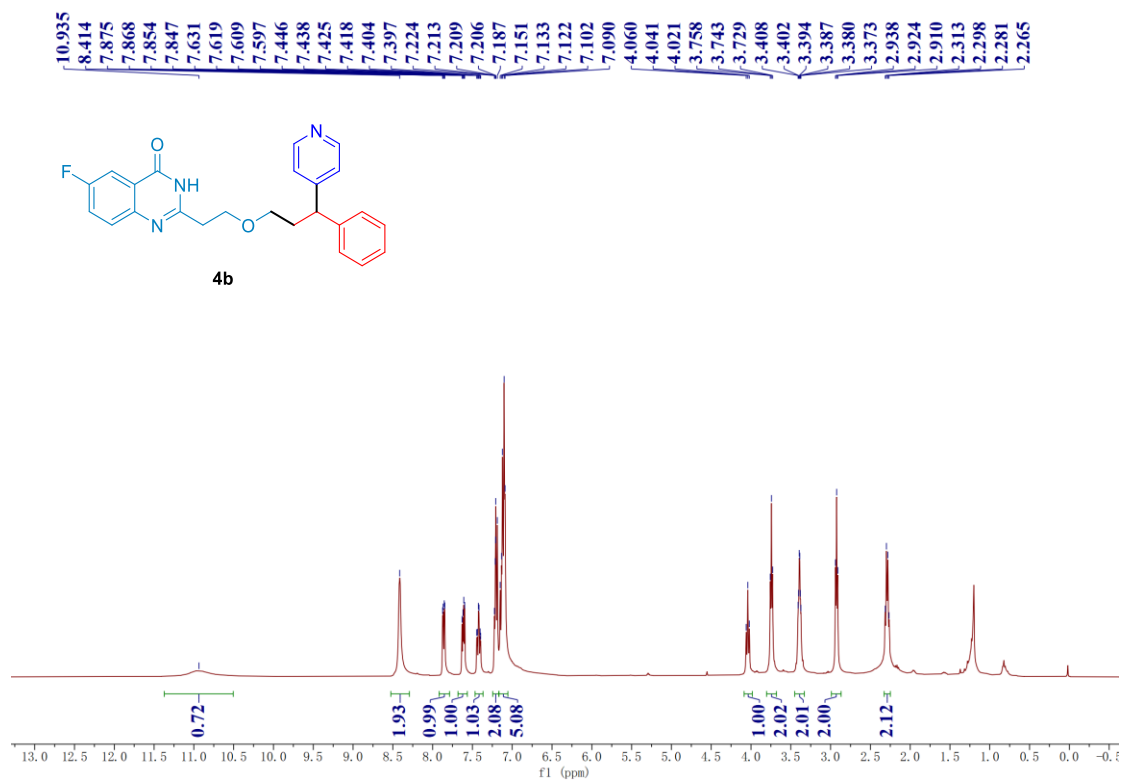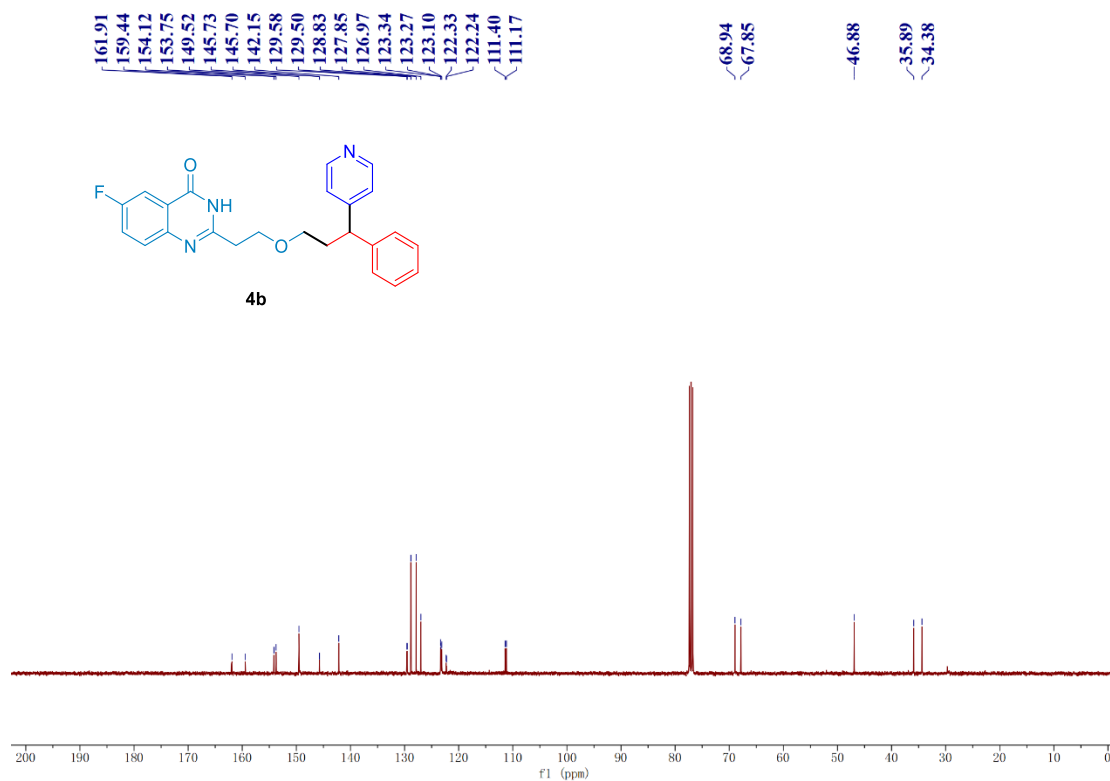

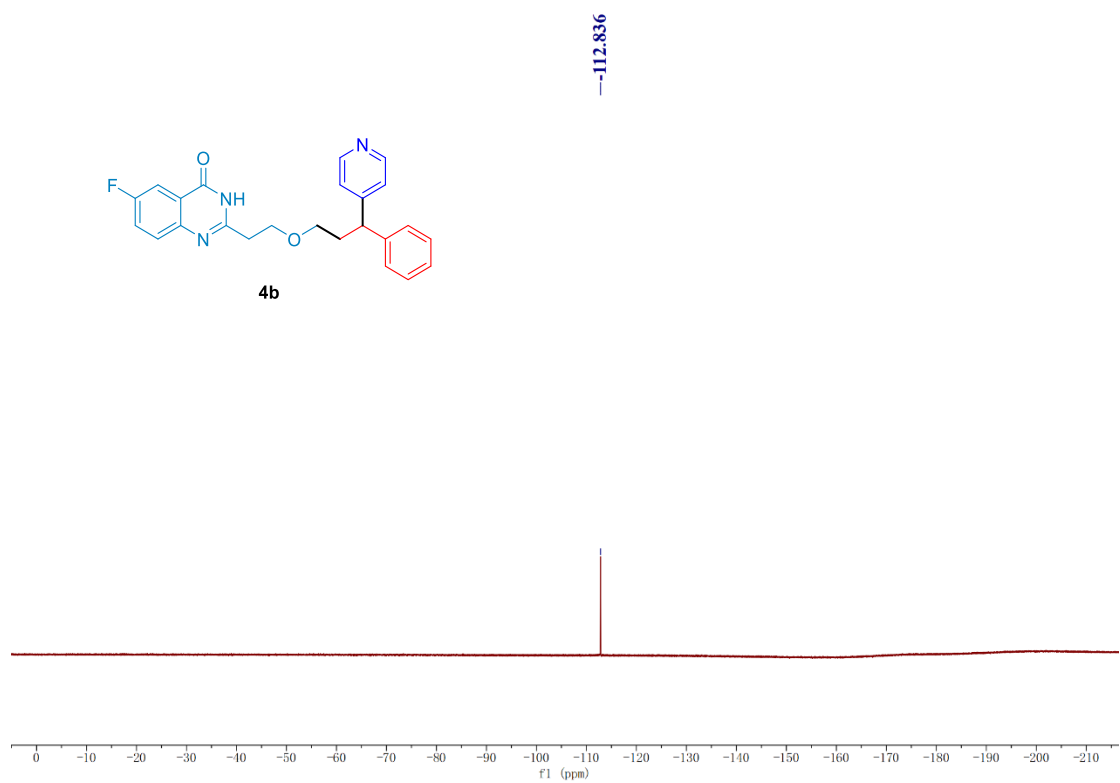

$^1\text{H}$  NMR (400 MHz,  $\text{CDCl}_3$ ) and  $^{13}\text{C}$  NMR (100 MHz,  $\text{CDCl}_3$ ) spectra of product **4c**

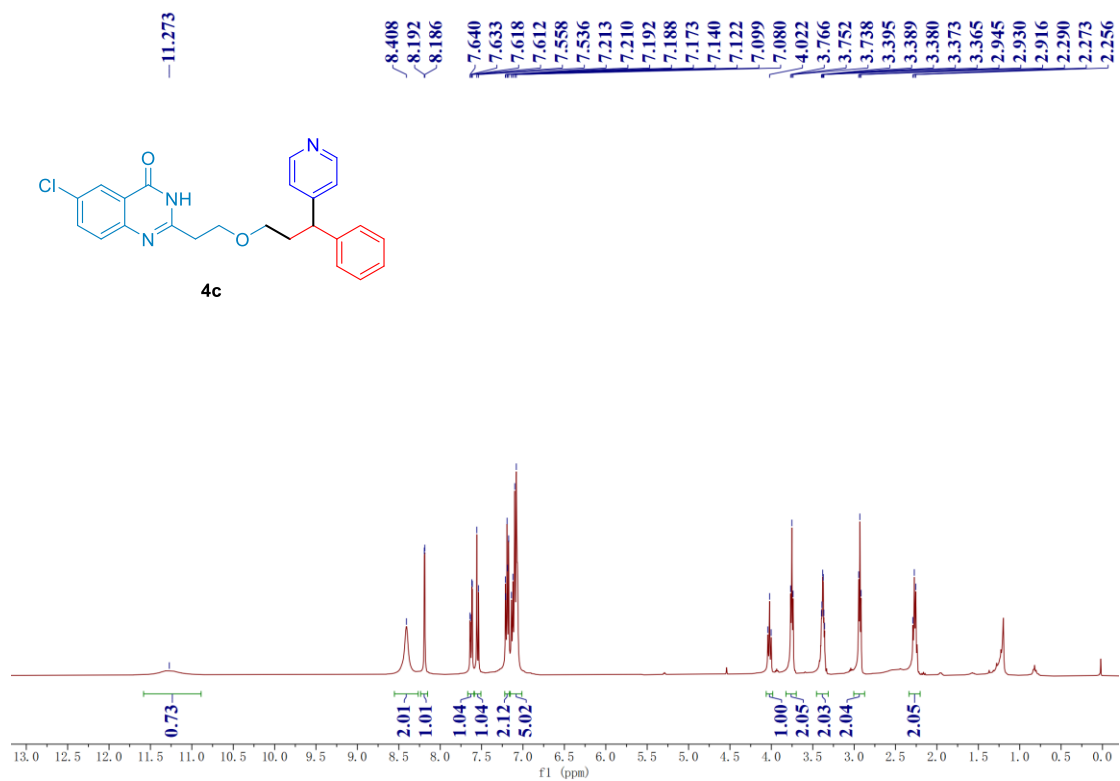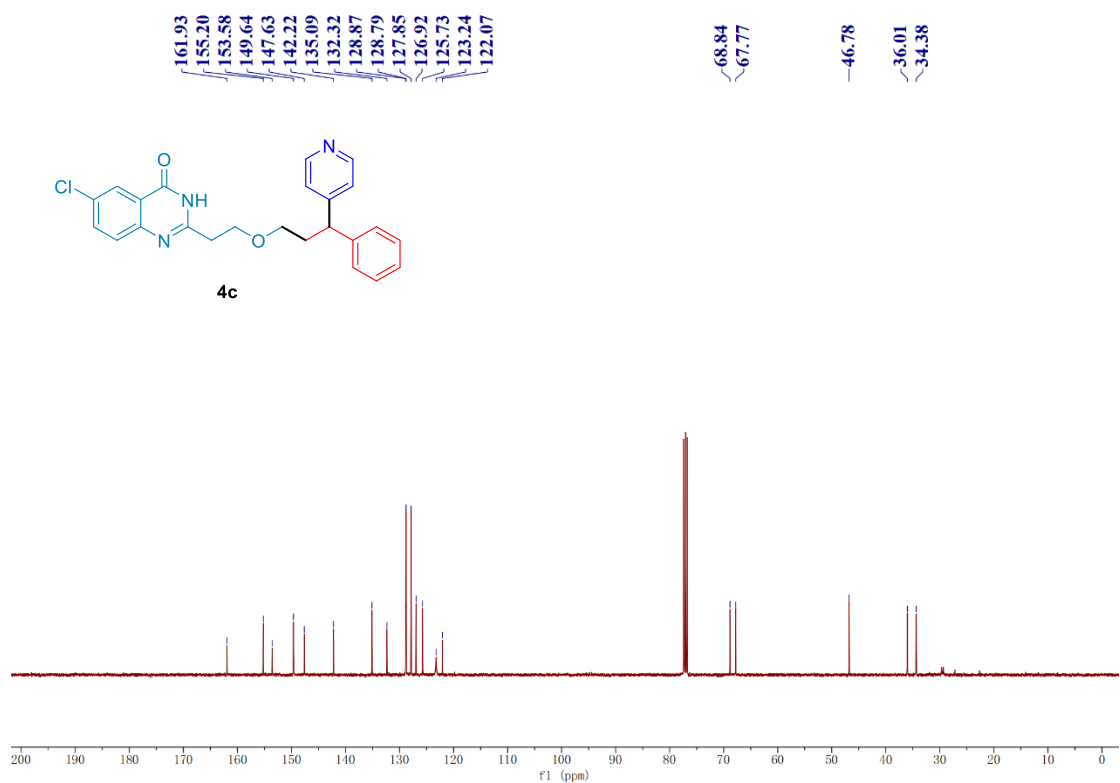

$^1\text{H}$  NMR (400 MHz,  $\text{CDCl}_3$ ) and  $^{13}\text{C}$  NMR (100 MHz,  $\text{CDCl}_3$ ) spectra of product **4d**

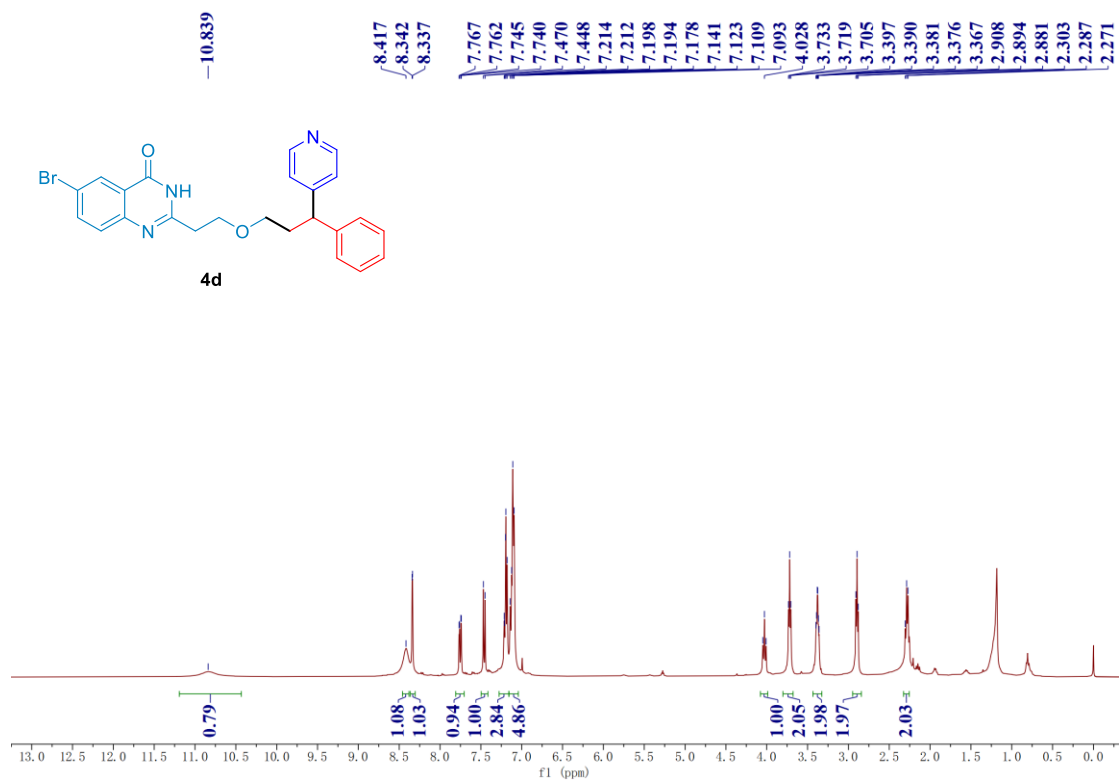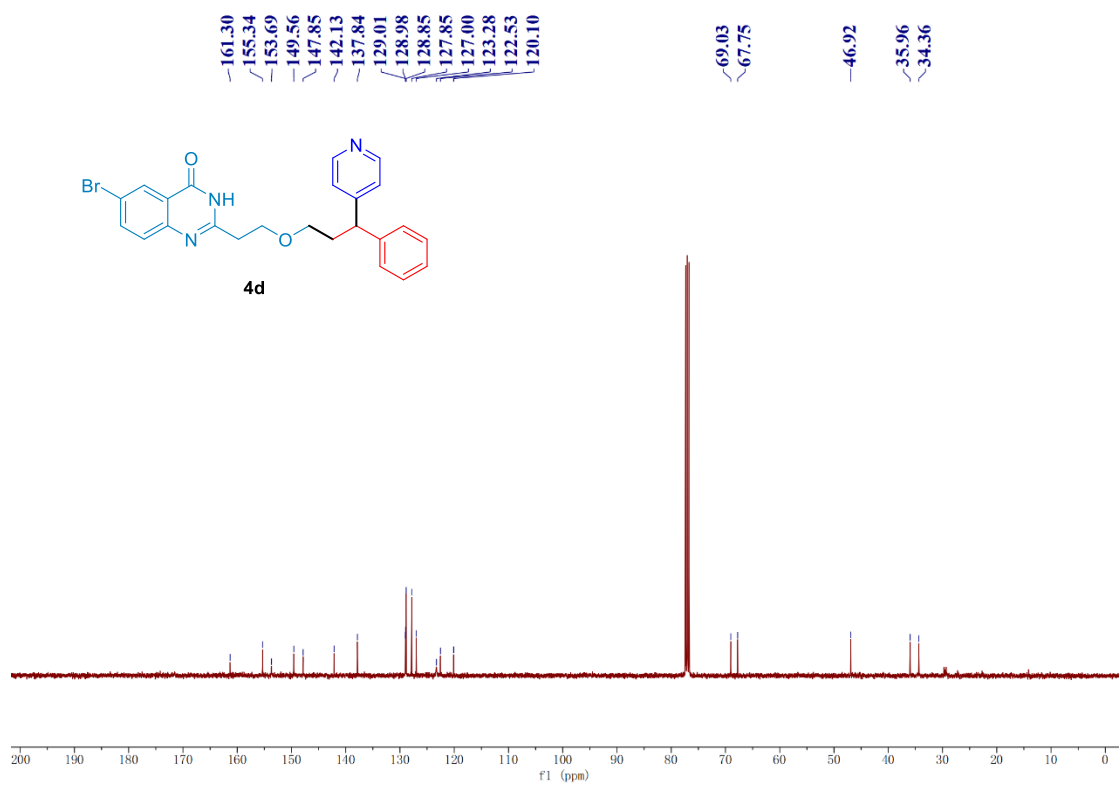



$^1\text{H}$  NMR (400 MHz,  $\text{CDCl}_3$ ) and  $^{13}\text{C}$  NMR (100 MHz,  $\text{CDCl}_3$ ) spectra of product **4e**

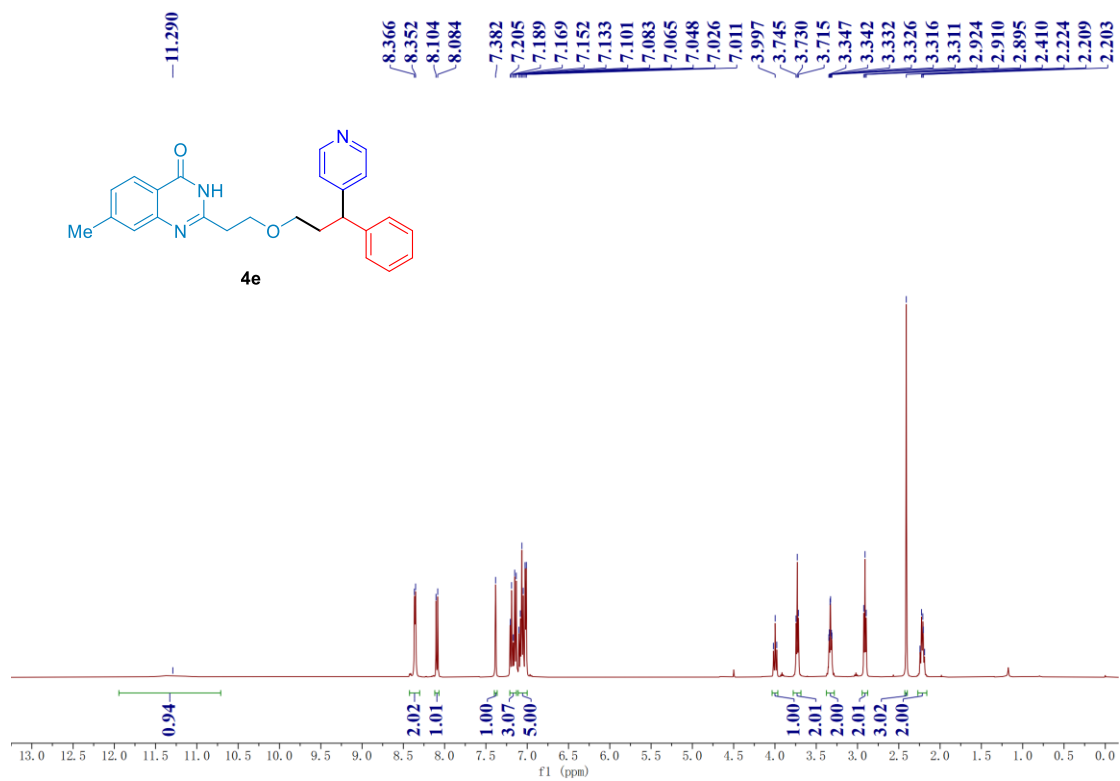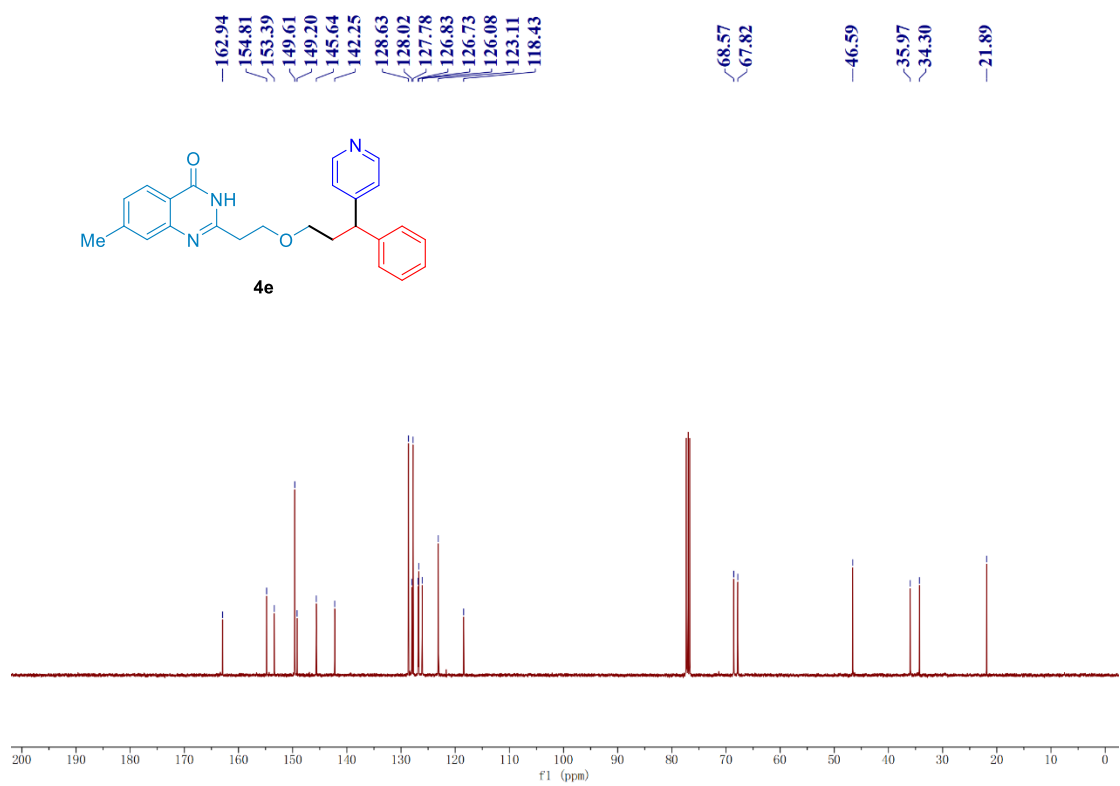

$^1\text{H}$  NMR (400 MHz,  $\text{CDCl}_3$ ) and  $^{13}\text{C}$  NMR (100 MHz,  $\text{CDCl}_3$ ) spectra of product **4f**

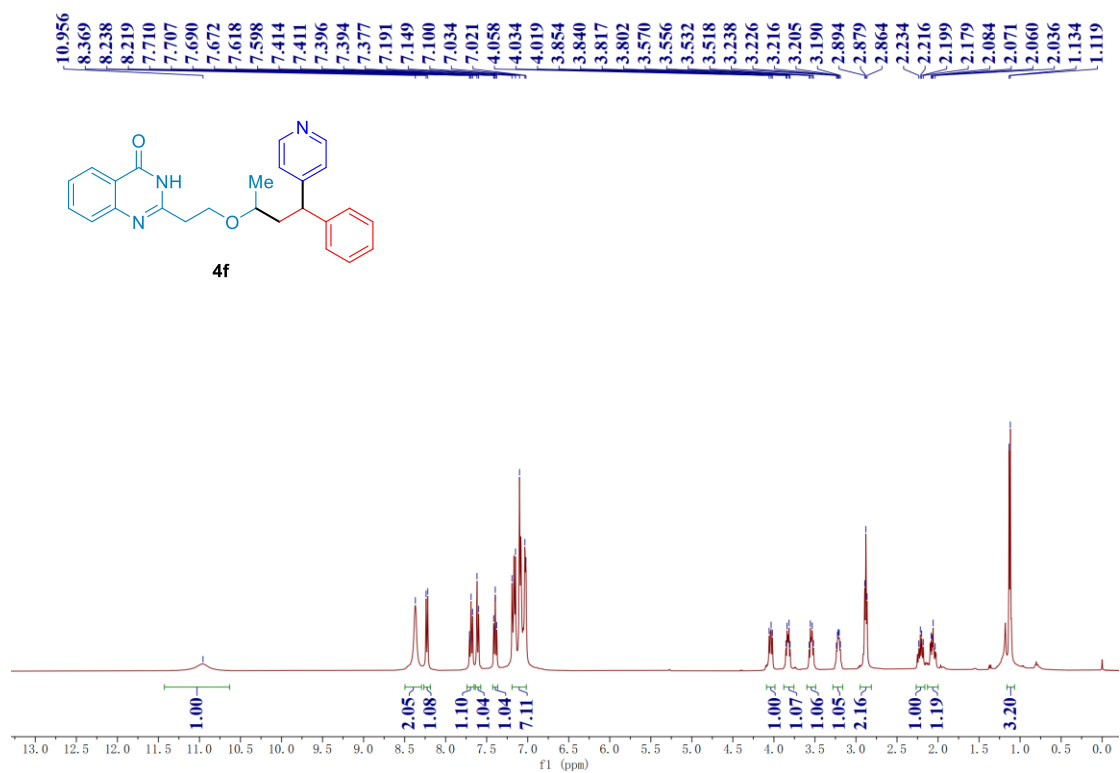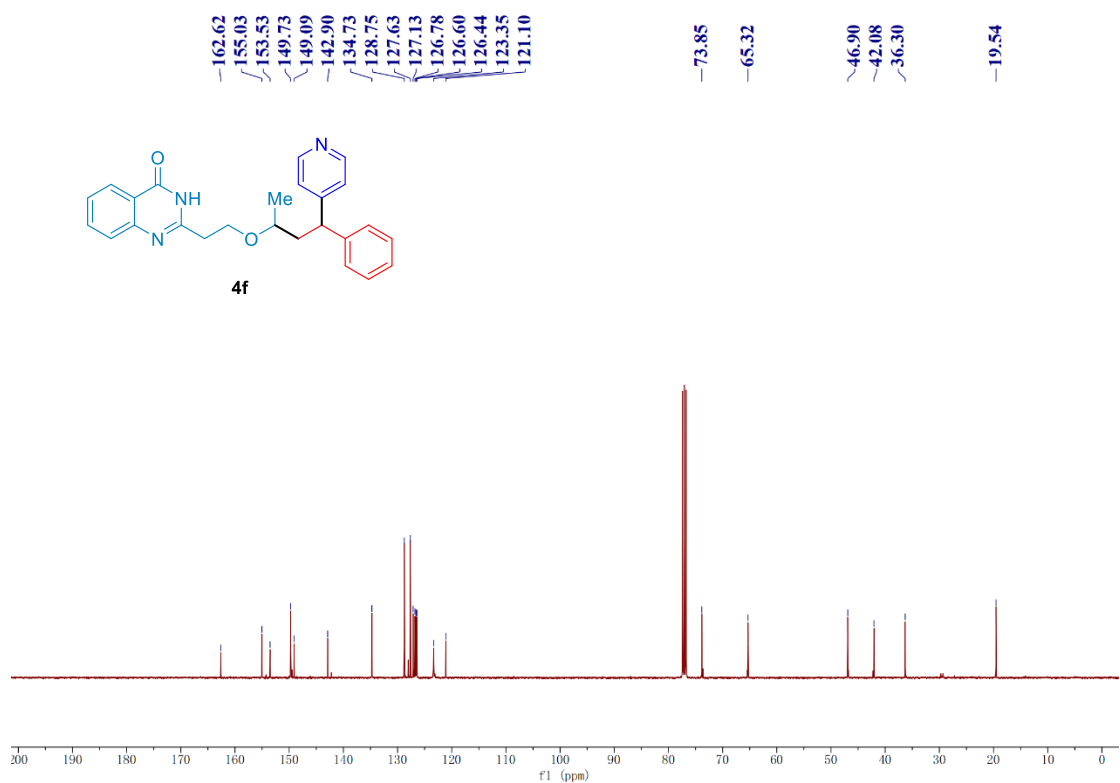

$^1\text{H}$  NMR (400 MHz,  $\text{CDCl}_3$ ) and  $^{13}\text{C}$  NMR (100 MHz,  $\text{CDCl}_3$ ) spectra of product **4g**

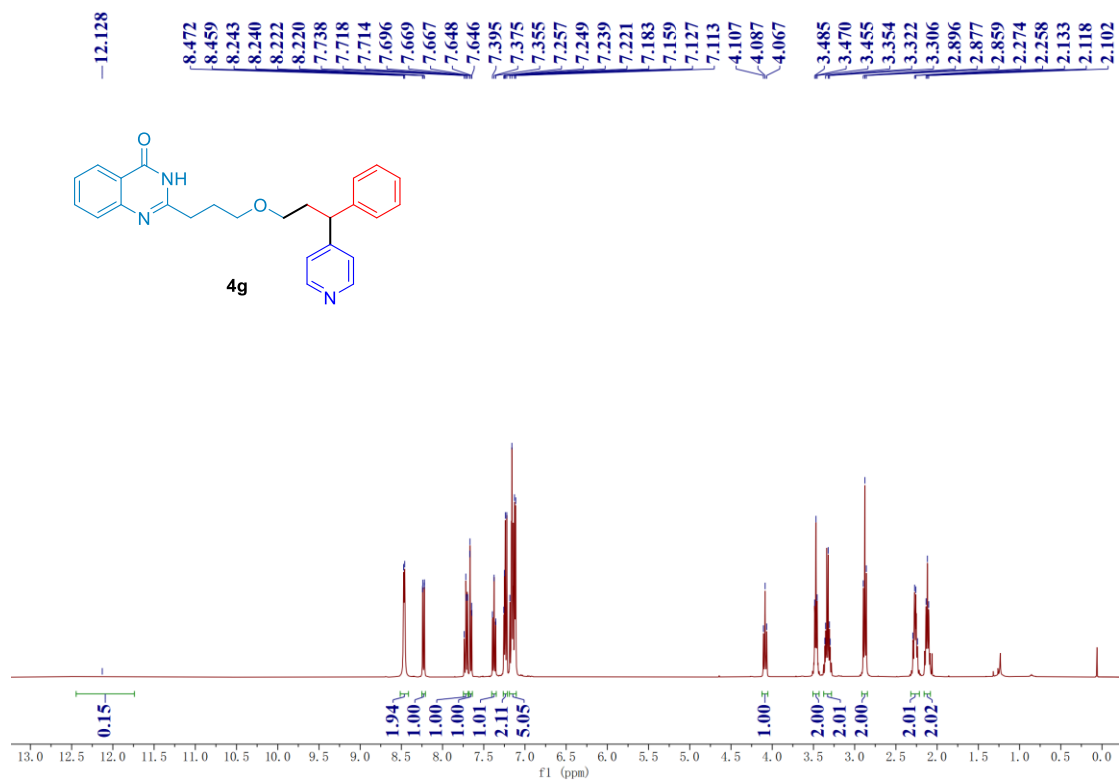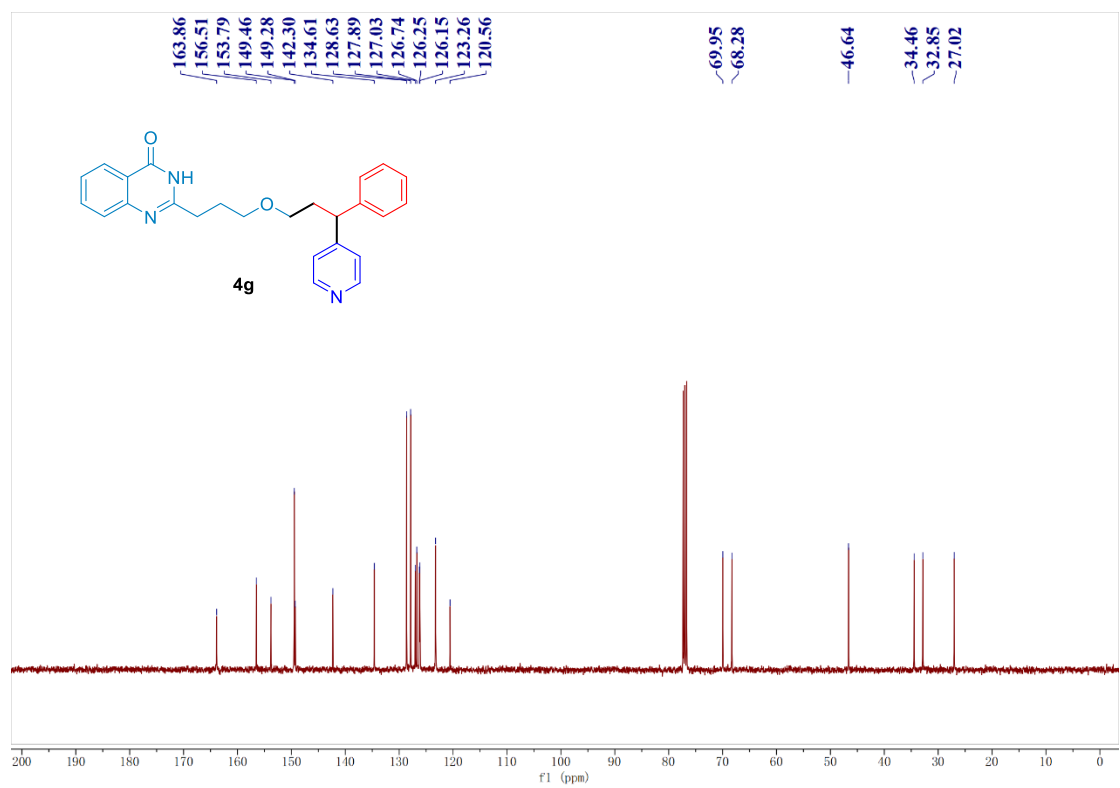

$^1\text{H}$  NMR (400 MHz,  $\text{CDCl}_3$ ) and  $^{13}\text{C}$  NMR (100 MHz,  $\text{CDCl}_3$ ) spectra of product **4h**

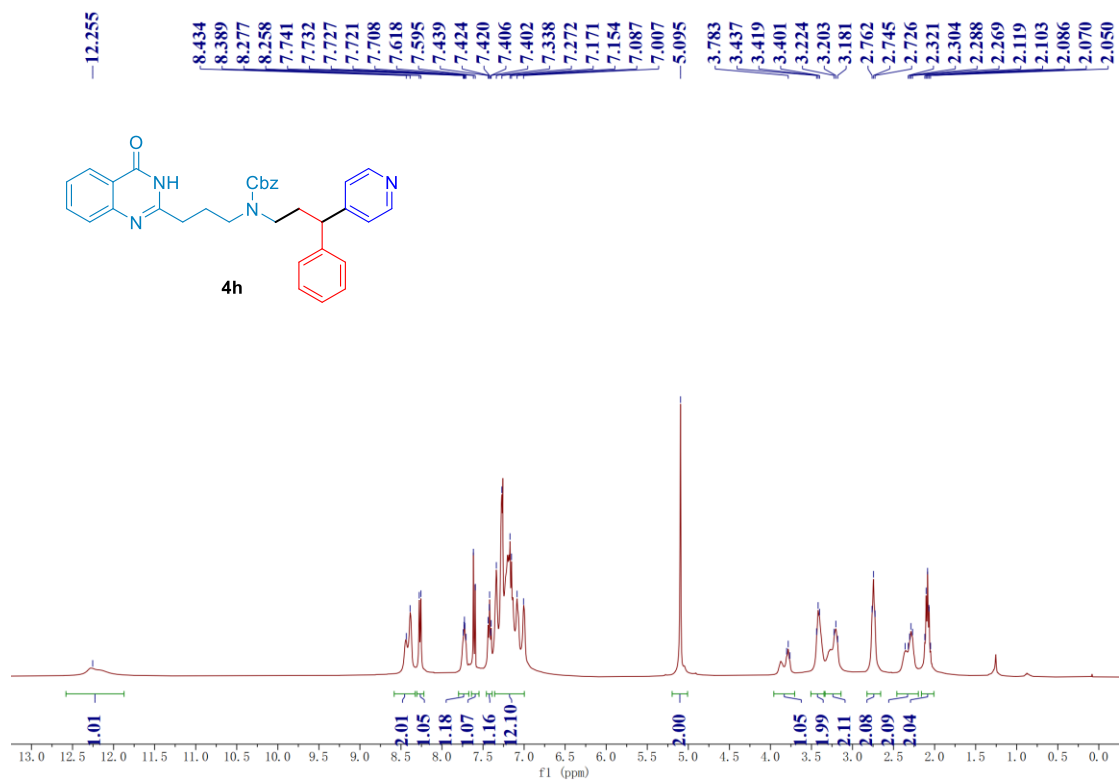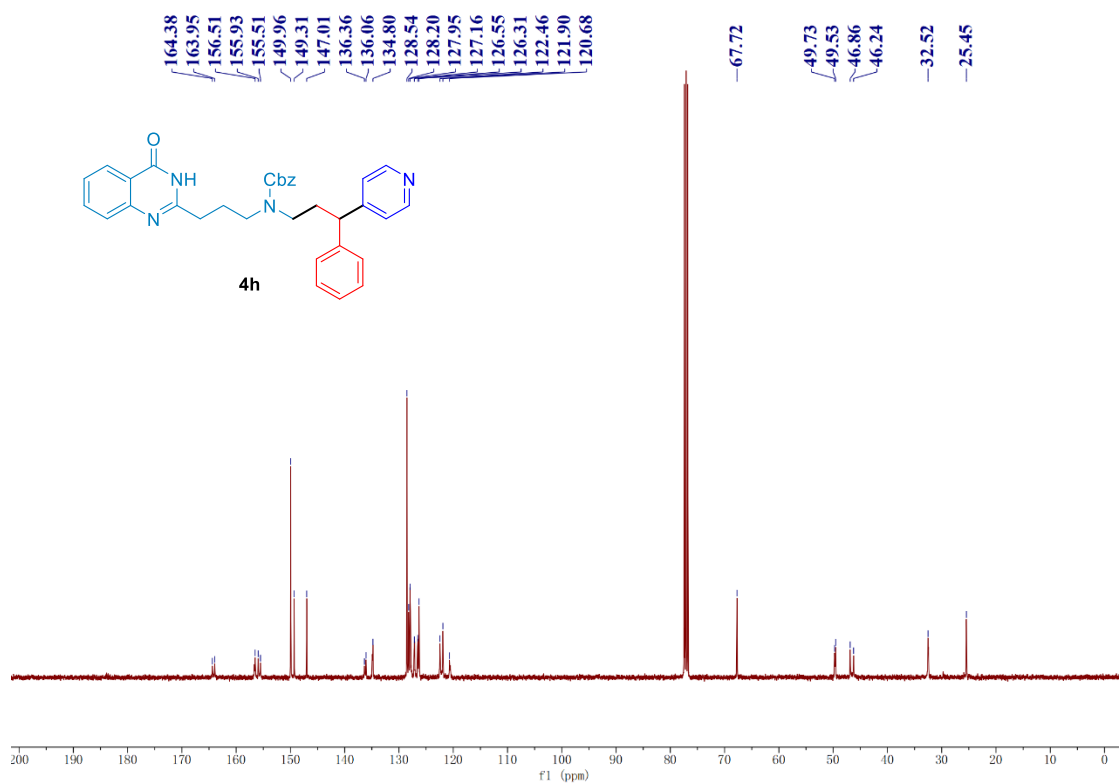

$^1\text{H}$  NMR (400 MHz,  $\text{CDCl}_3$ ) and  $^{13}\text{C}$  NMR (100 MHz,  $\text{CDCl}_3$ ) spectra of product **4i**

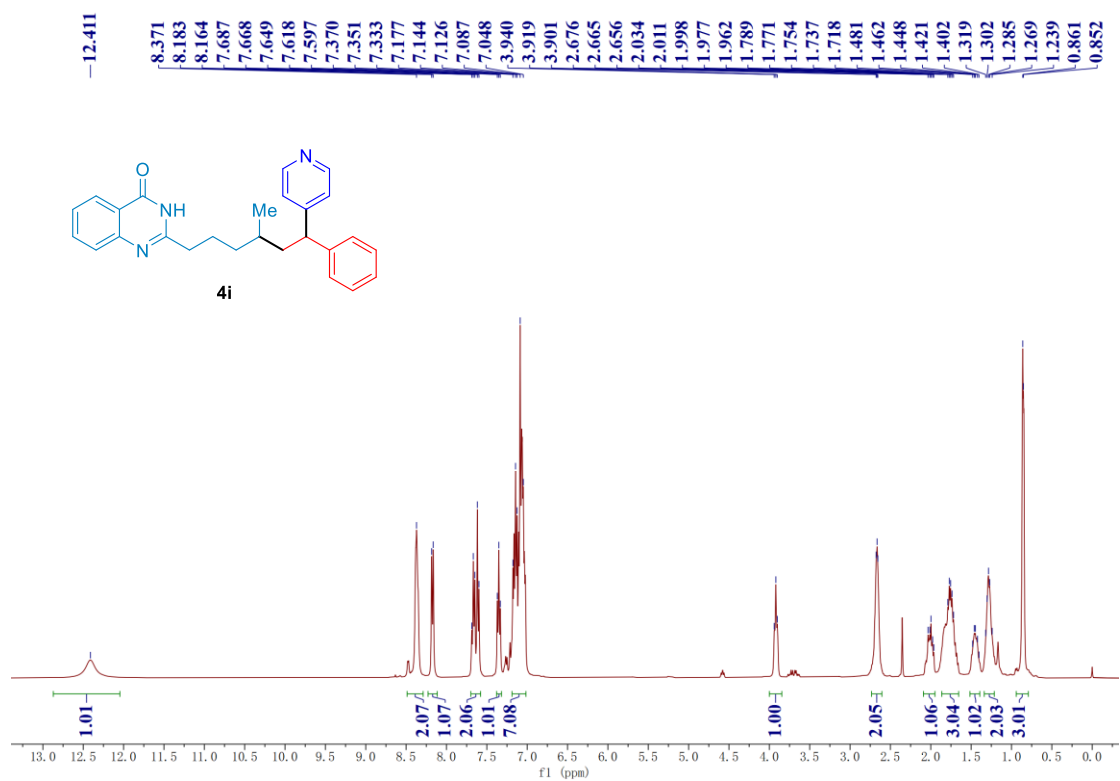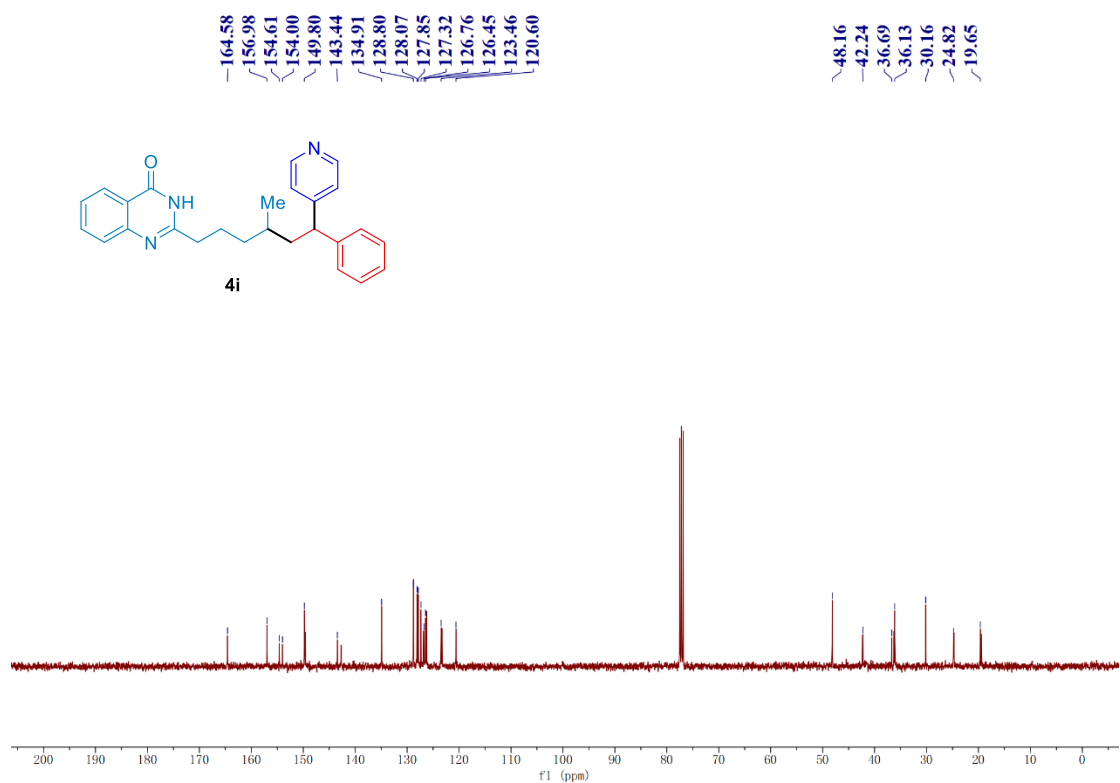

$^1\text{H}$  NMR (400 MHz,  $\text{CDCl}_3$ ) and  $^{13}\text{C}$  NMR (100 MHz,  $\text{CDCl}_3$ ) spectra of product **4j**

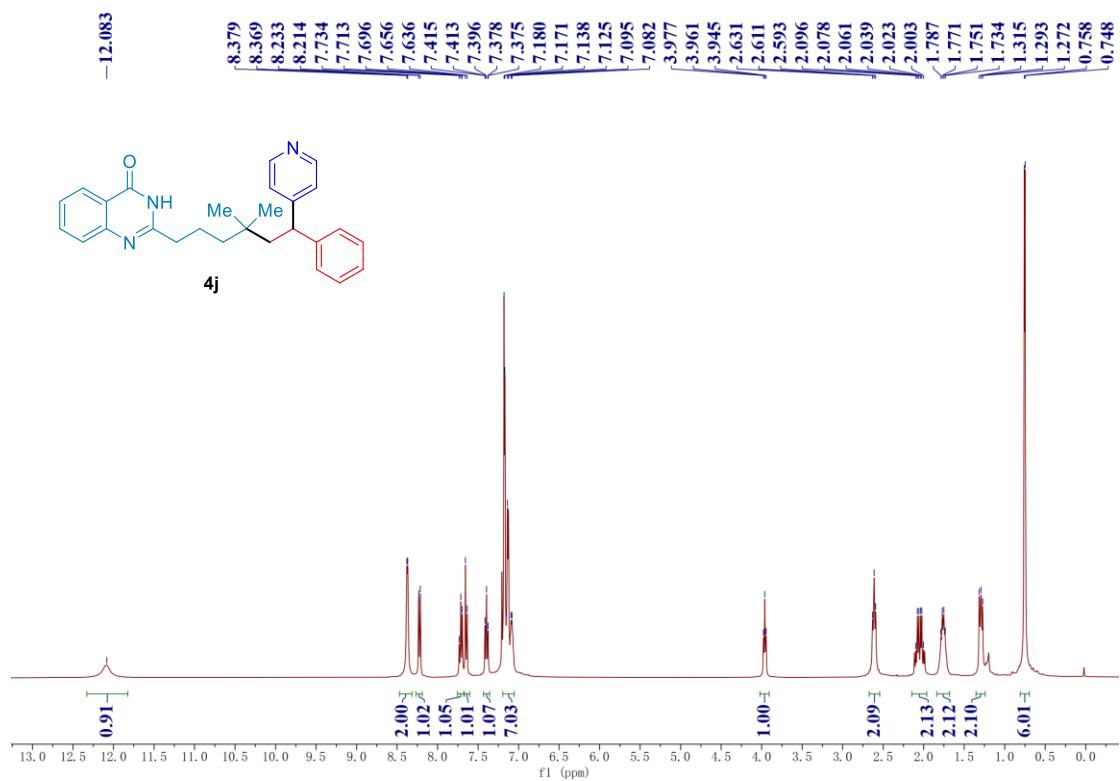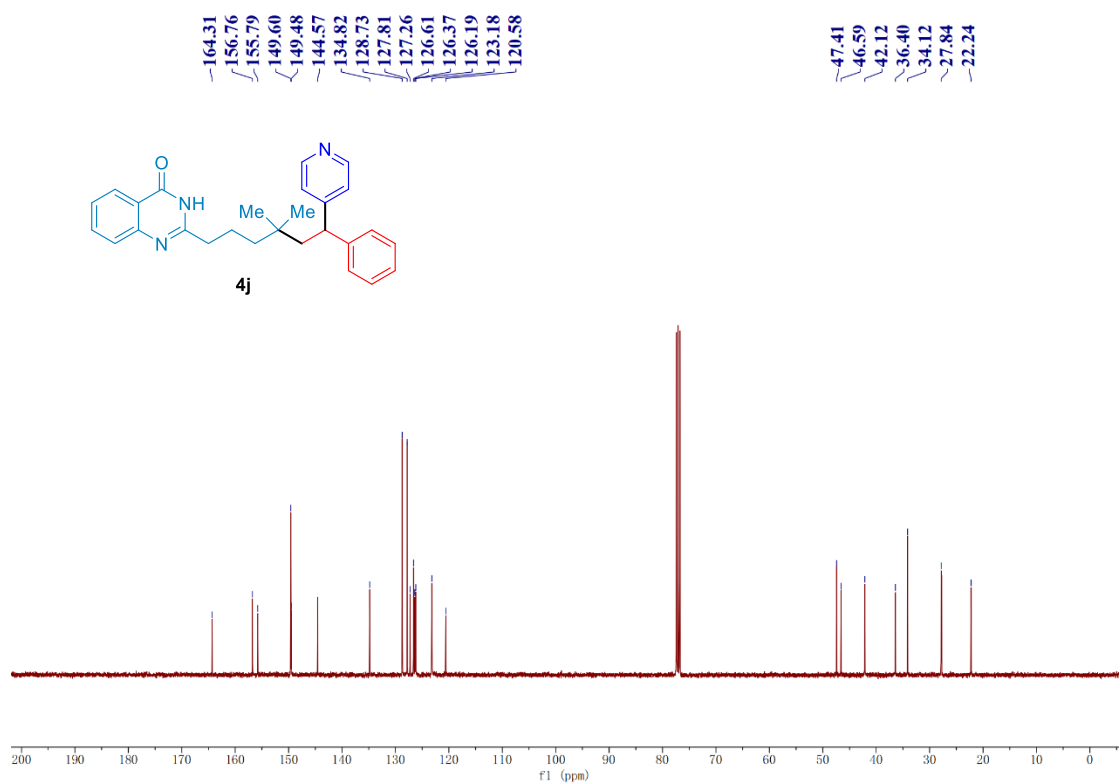

$^1\text{H}$  NMR (400 MHz,  $\text{CDCl}_3$ ) and  $^{13}\text{C}$  NMR (100 MHz,  $\text{CDCl}_3$ ) spectra of product **4k**

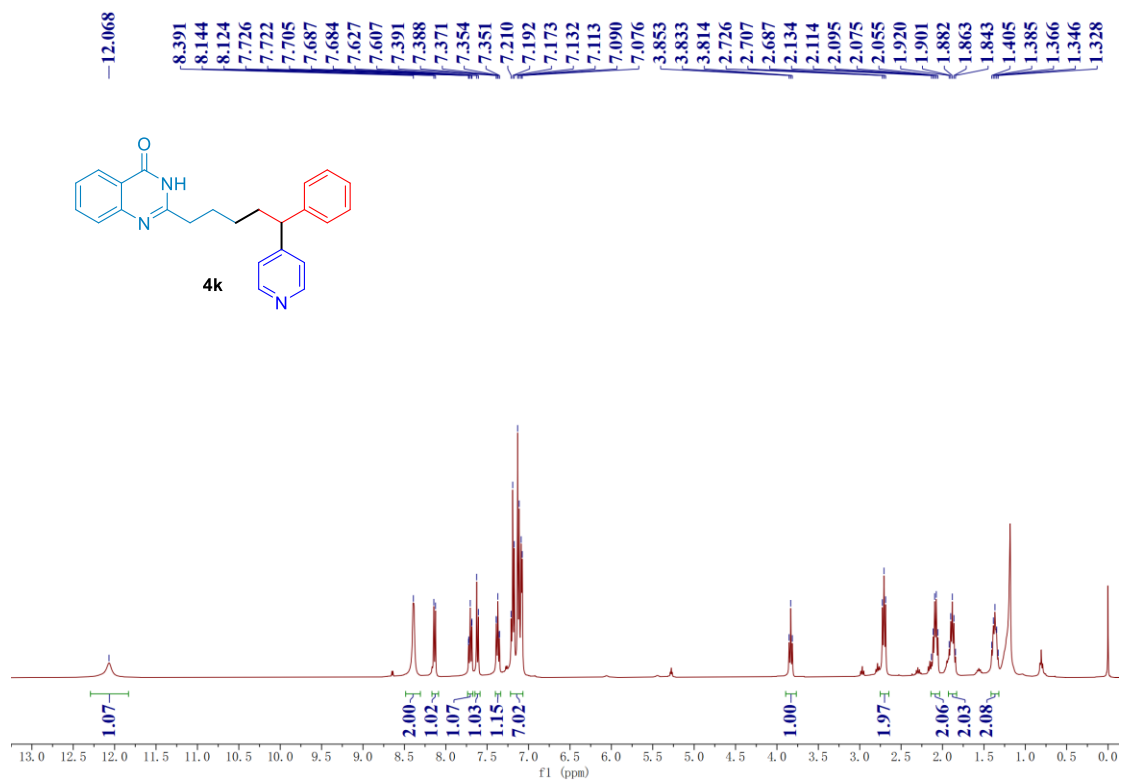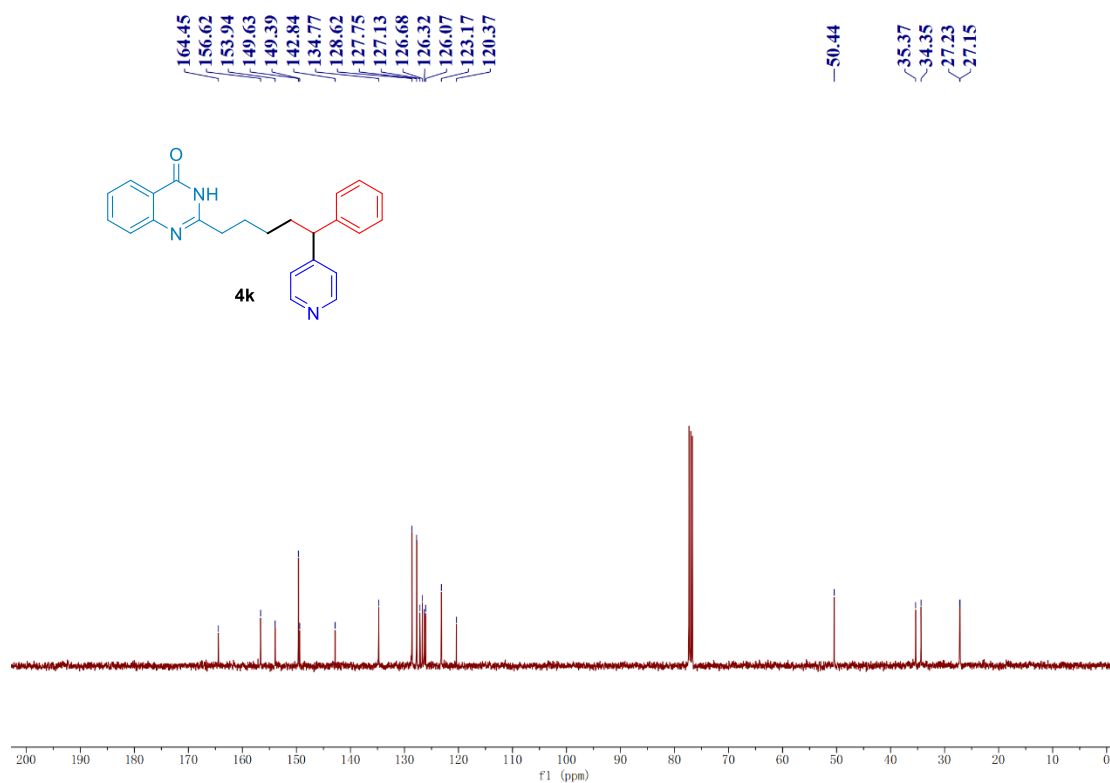

$^1\text{H}$  NMR (400 MHz,  $\text{CDCl}_3$ ) and  $^{13}\text{C}$  NMR (100 MHz,  $\text{CDCl}_3$ ) spectra of product **4l**

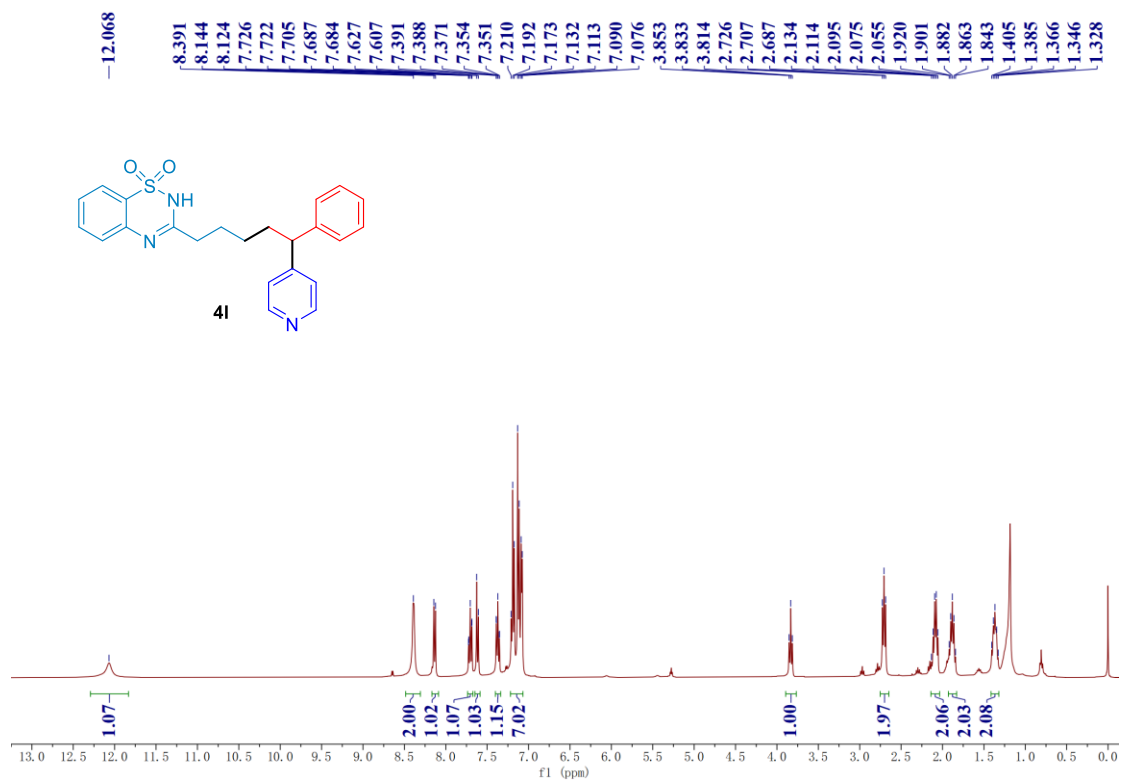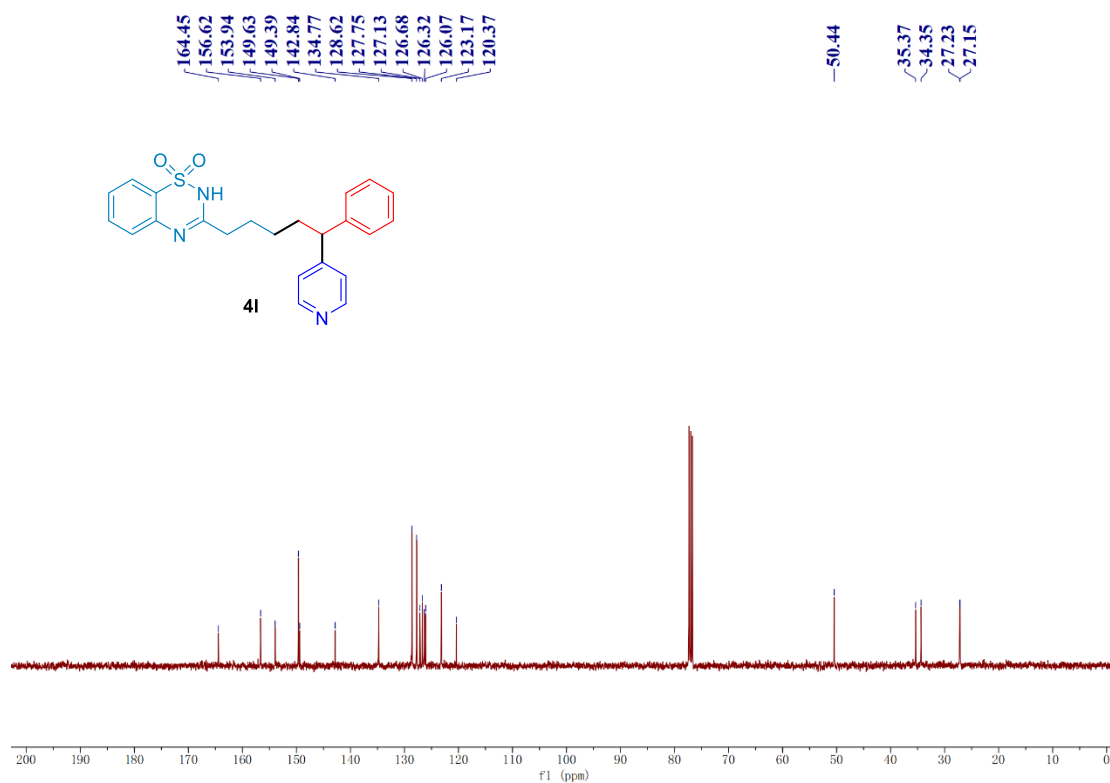



$^1\text{H}$  NMR (400 MHz,  $\text{CDCl}_3$ ) and  $^{13}\text{C}$  NMR (100 MHz,  $\text{CDCl}_3$ ) spectra of product **4m**

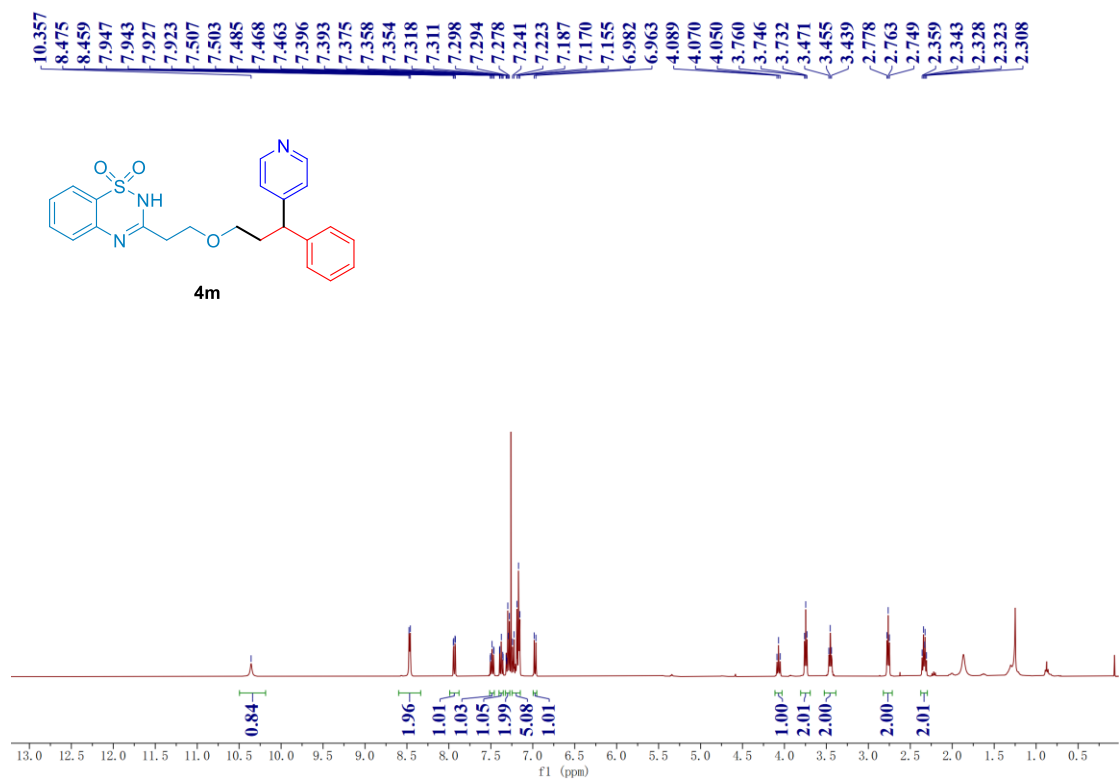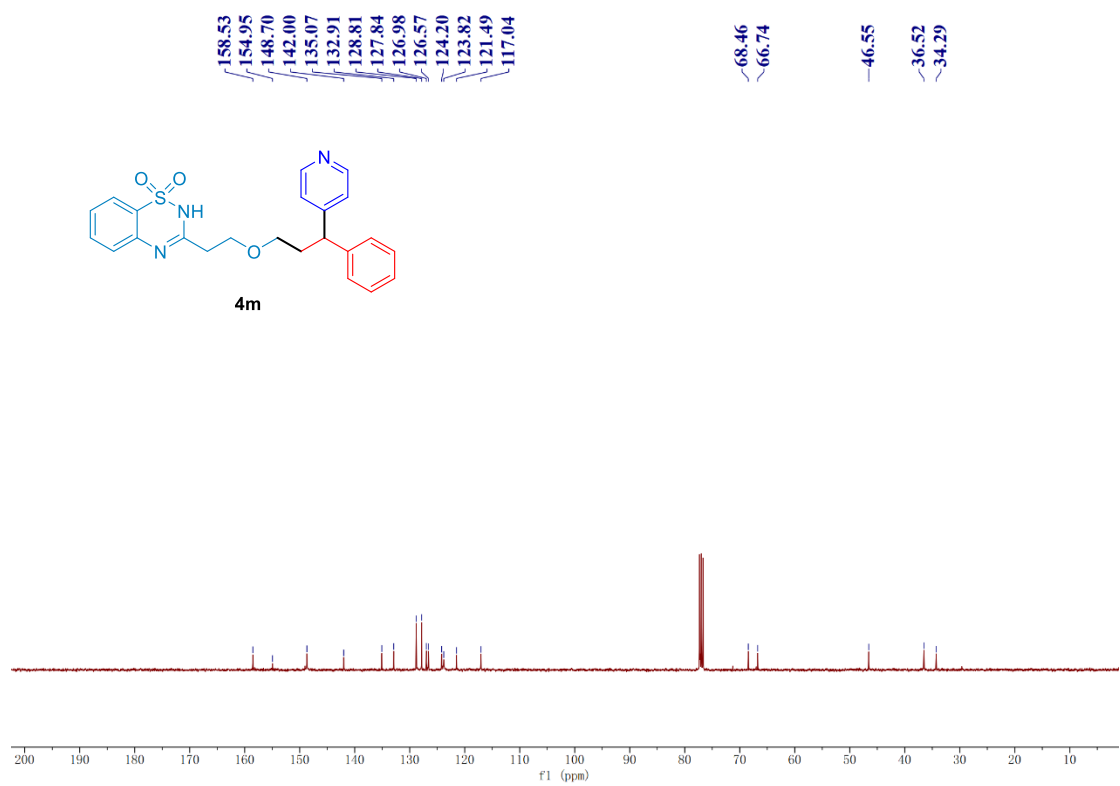

$^1\text{H}$  NMR (400 MHz,  $\text{CDCl}_3$ ) and  $^{13}\text{C}$  NMR (100 MHz,  $\text{CDCl}_3$ ) spectra of product **4n'**

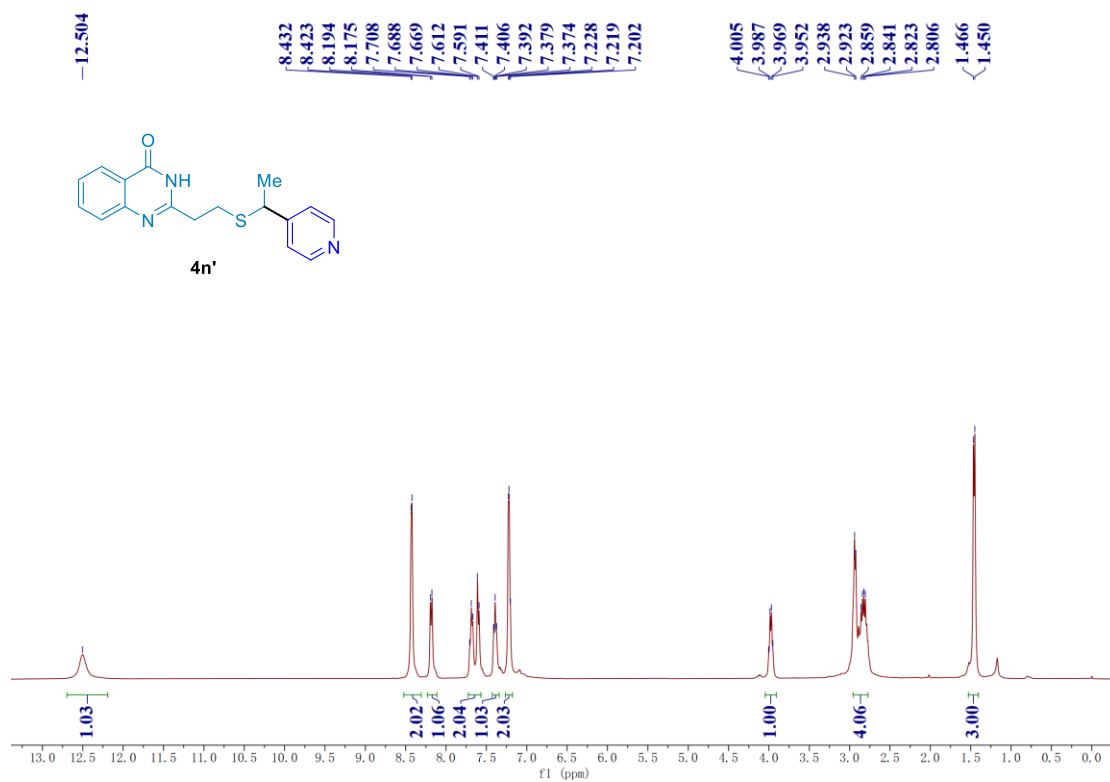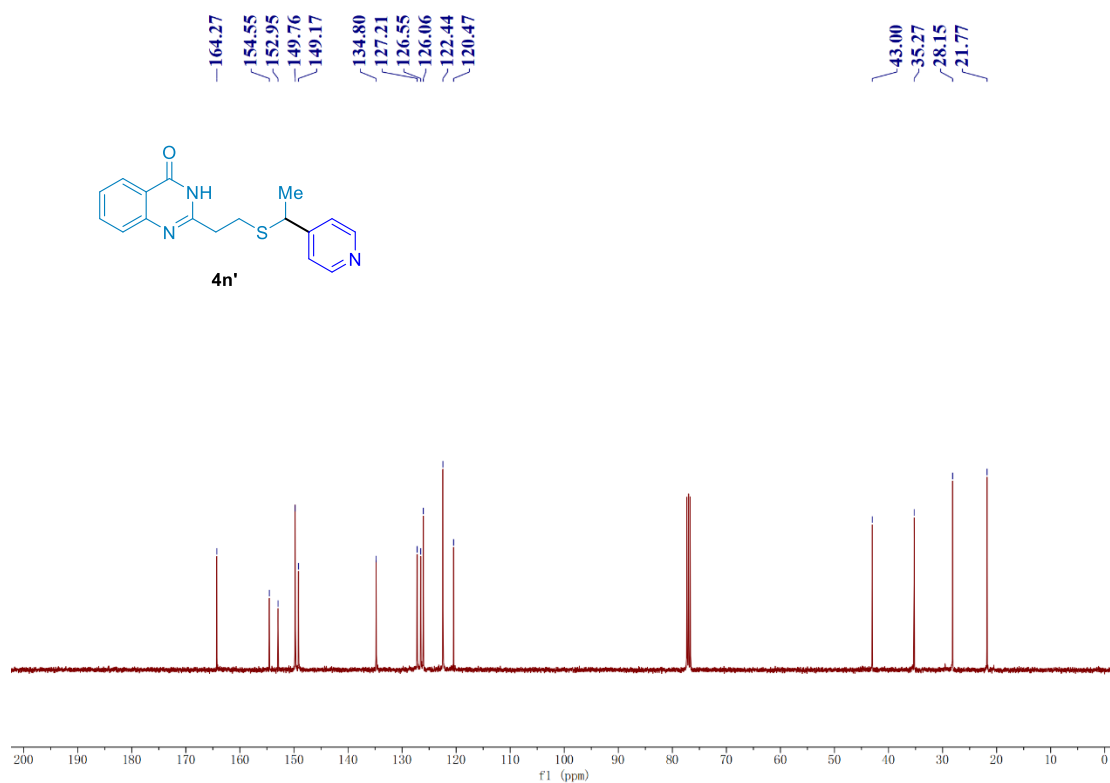

$^1\text{H}$  NMR (400 MHz,  $\text{CDCl}_3$ ) and  $^{13}\text{C}$  NMR (100 MHz,  $\text{CDCl}_3$ ) spectra of product **5a**

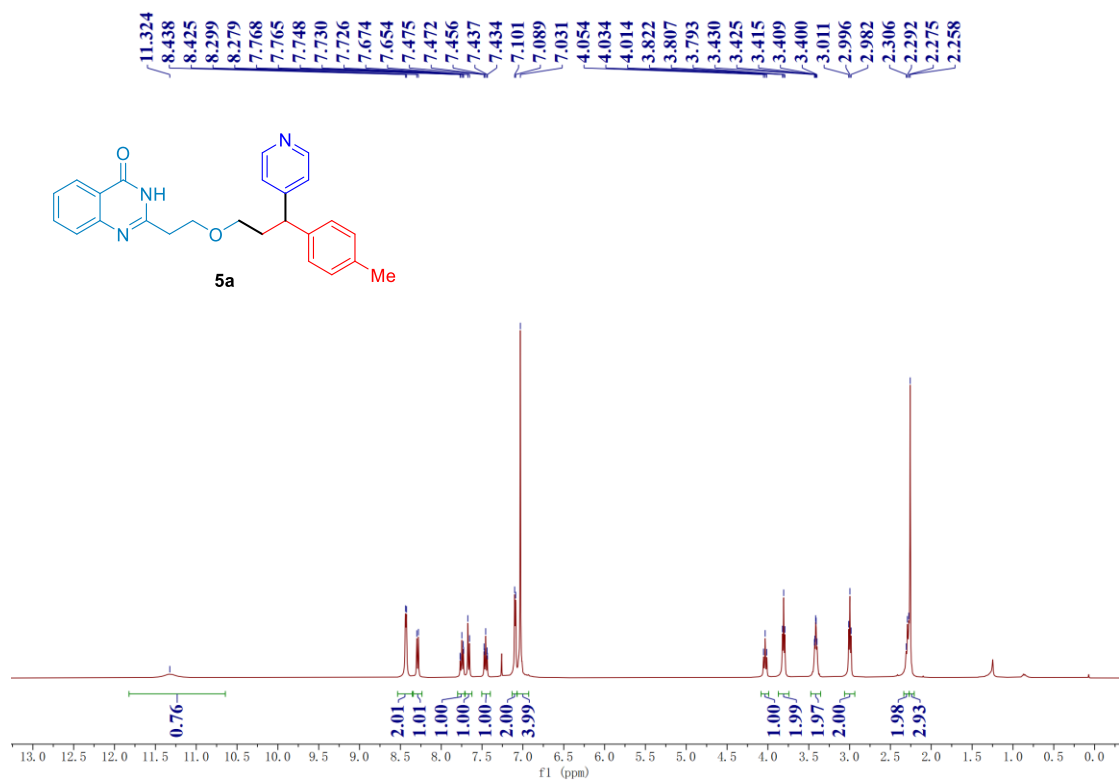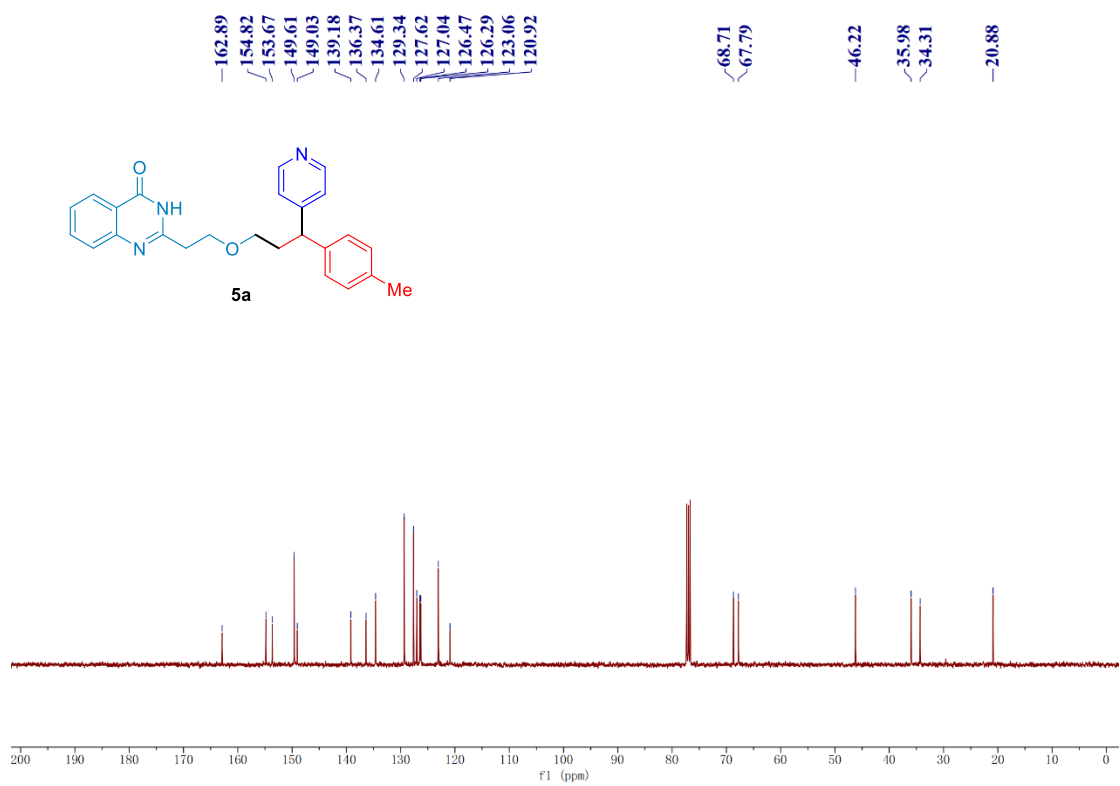

$^1\text{H}$  NMR (400 MHz,  $\text{CDCl}_3$ ) and  $^{13}\text{C}$  NMR (100 MHz,  $\text{CDCl}_3$ ) spectra of product **5b**

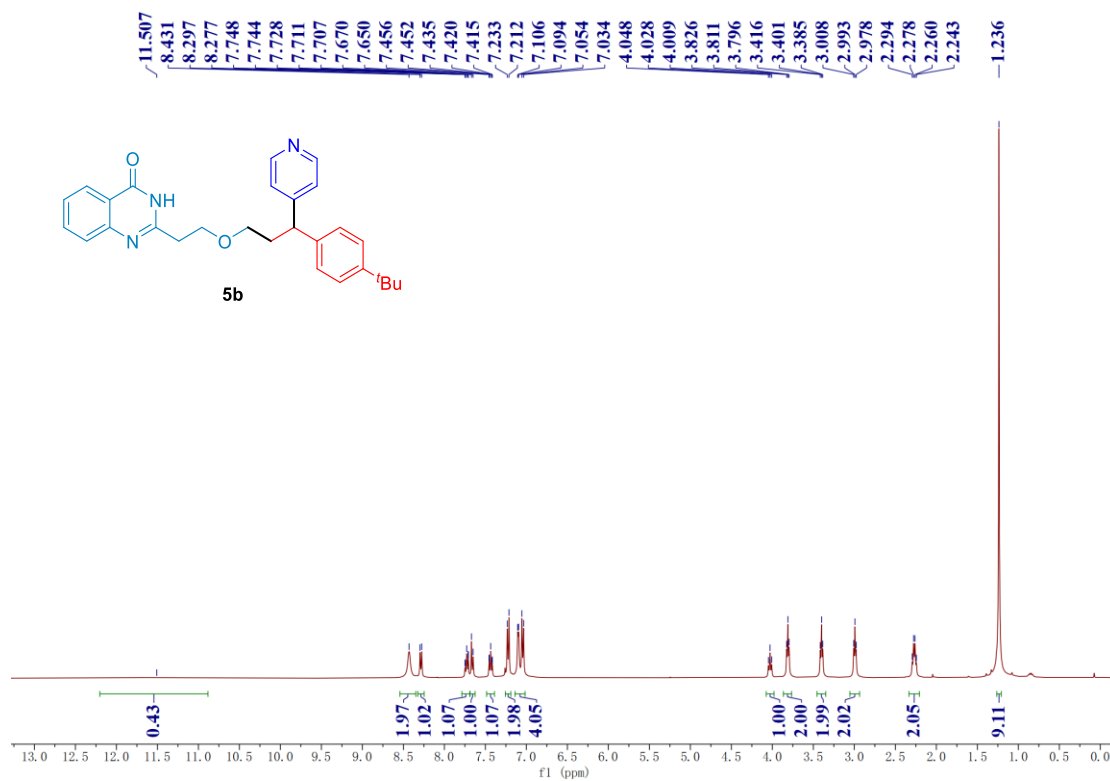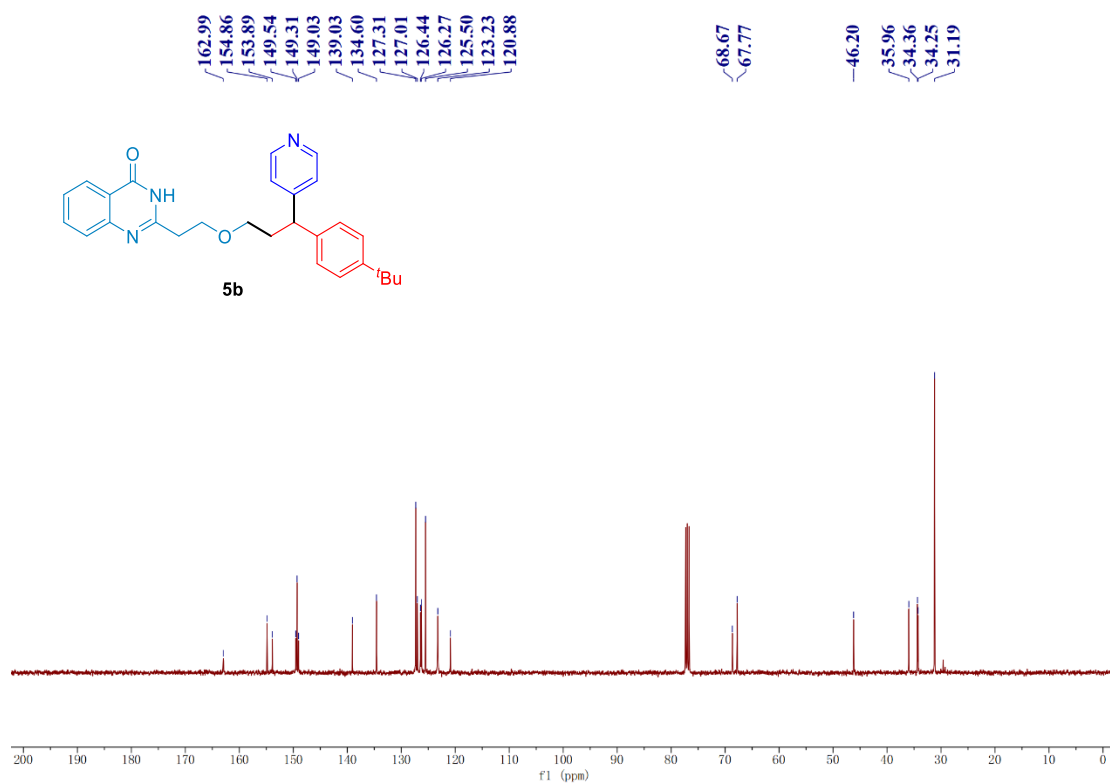

$^1\text{H}$  NMR (400 MHz,  $\text{CDCl}_3$ ) and  $^{13}\text{C}$  NMR (100 MHz,  $\text{CDCl}_3$ ) spectra of product **5c**

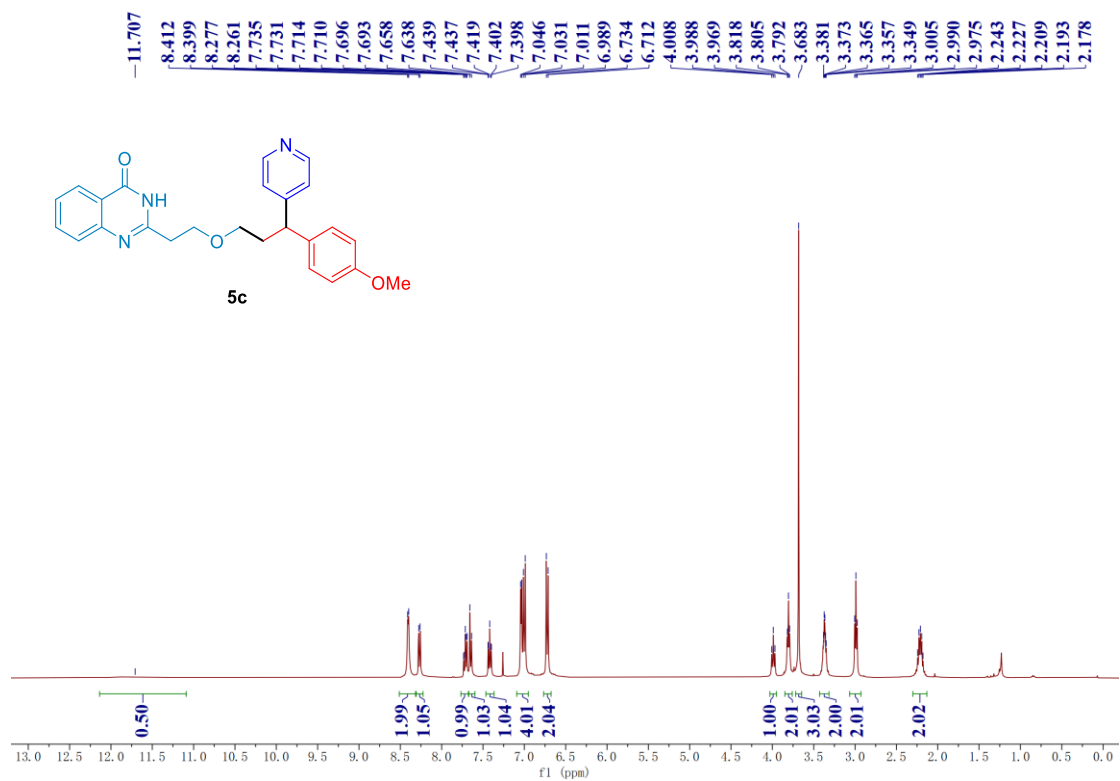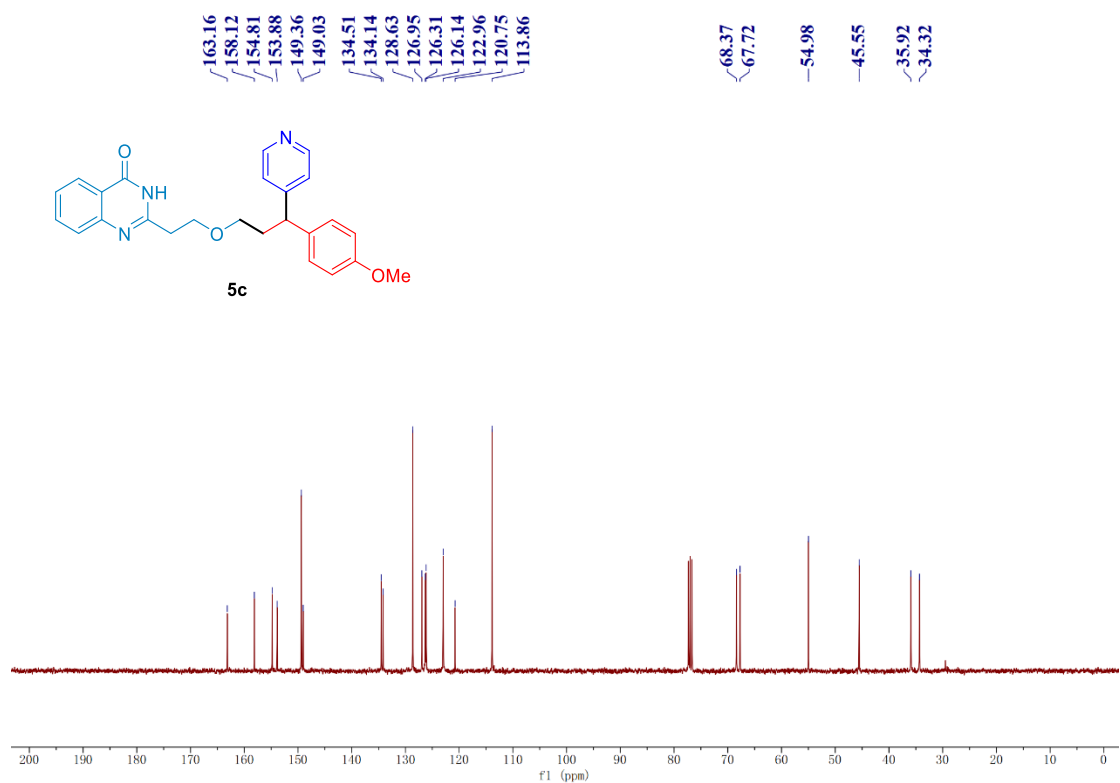

$^1\text{H}$  NMR (400 MHz,  $\text{CDCl}_3$ ) and  $^{13}\text{C}$  NMR (100 MHz,  $\text{CDCl}_3$ ) spectra of product **5d**

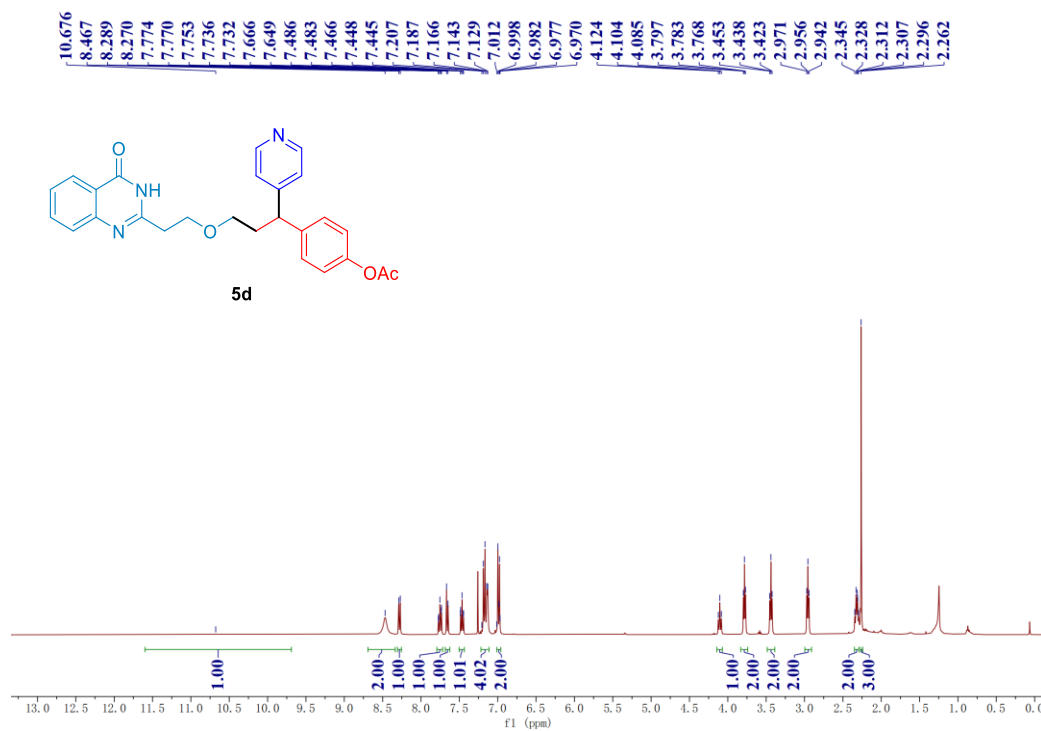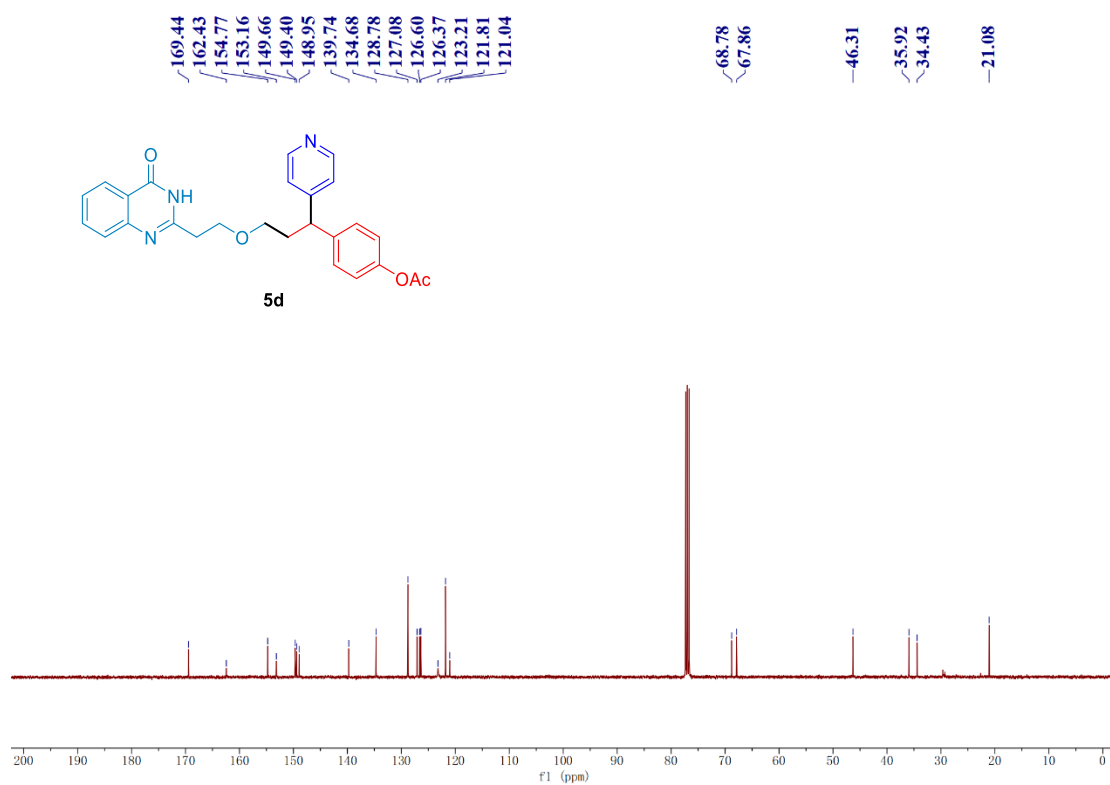

$^1\text{H}$  NMR (400 MHz,  $\text{CDCl}_3$ ) and  $^{13}\text{C}$  NMR (100 MHz,  $\text{CDCl}_3$ ) spectra of product **5e**

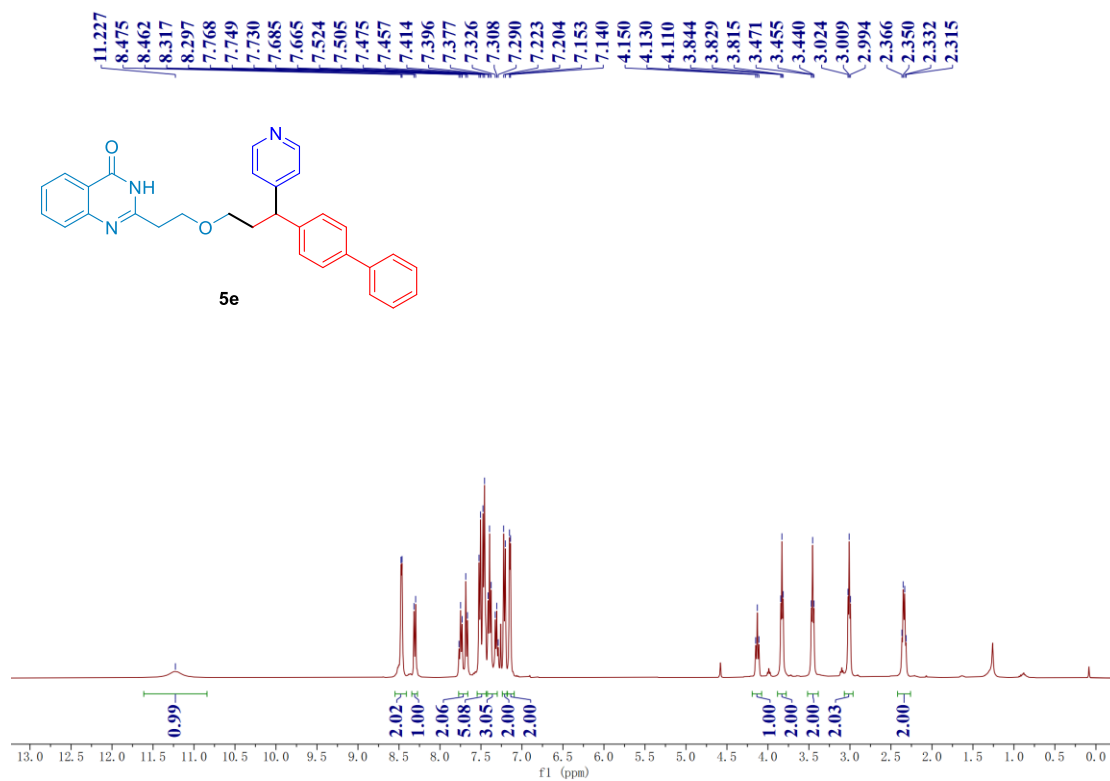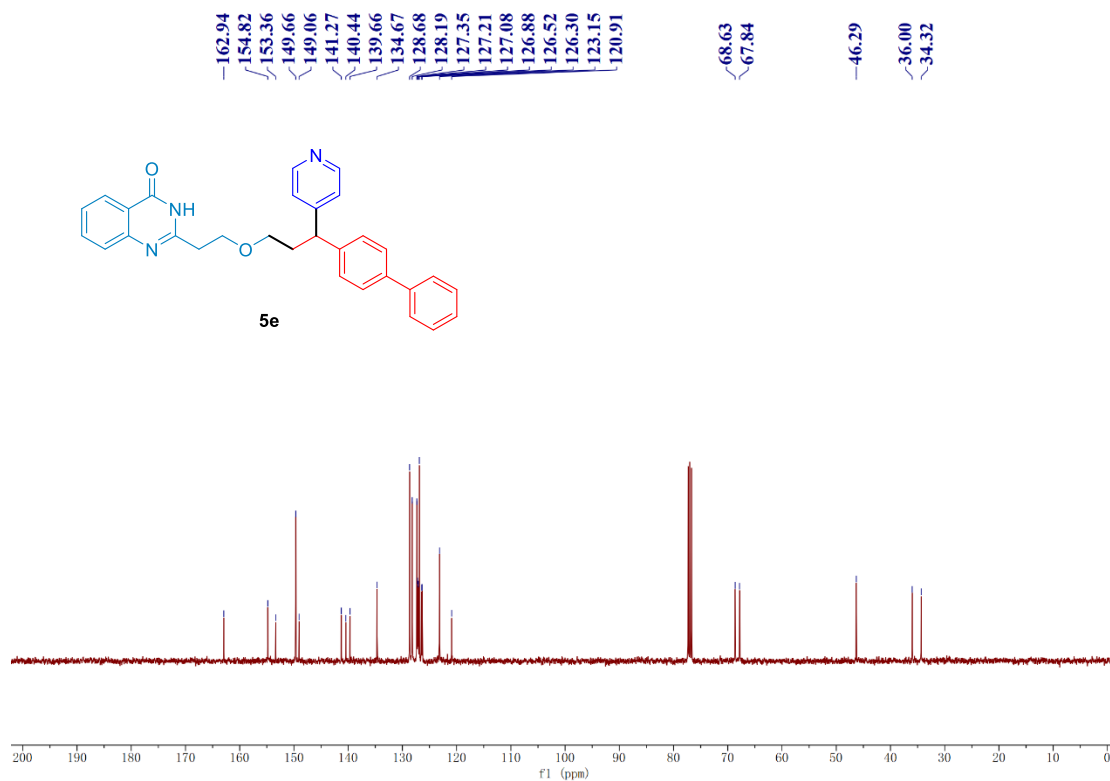

$^1\text{H}$  NMR (400 MHz,  $\text{CDCl}_3$ ) and  $^{13}\text{C}$  NMR (100 MHz,  $\text{CDCl}_3$ ) spectra of product **5f**

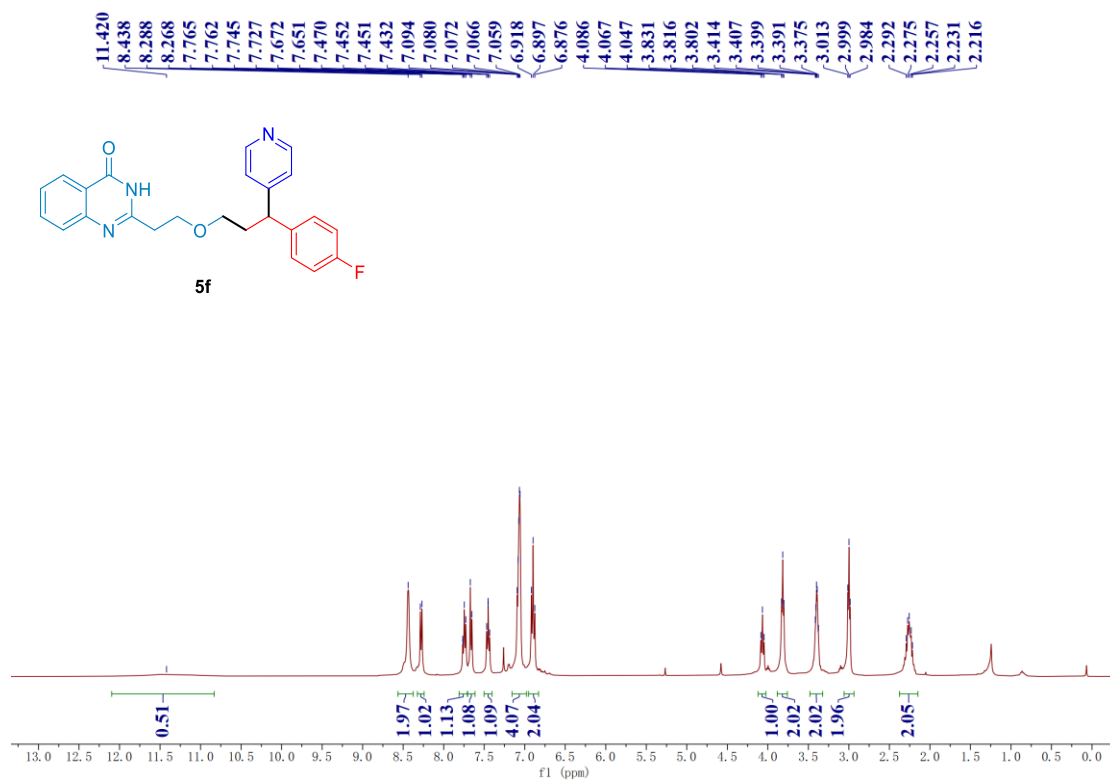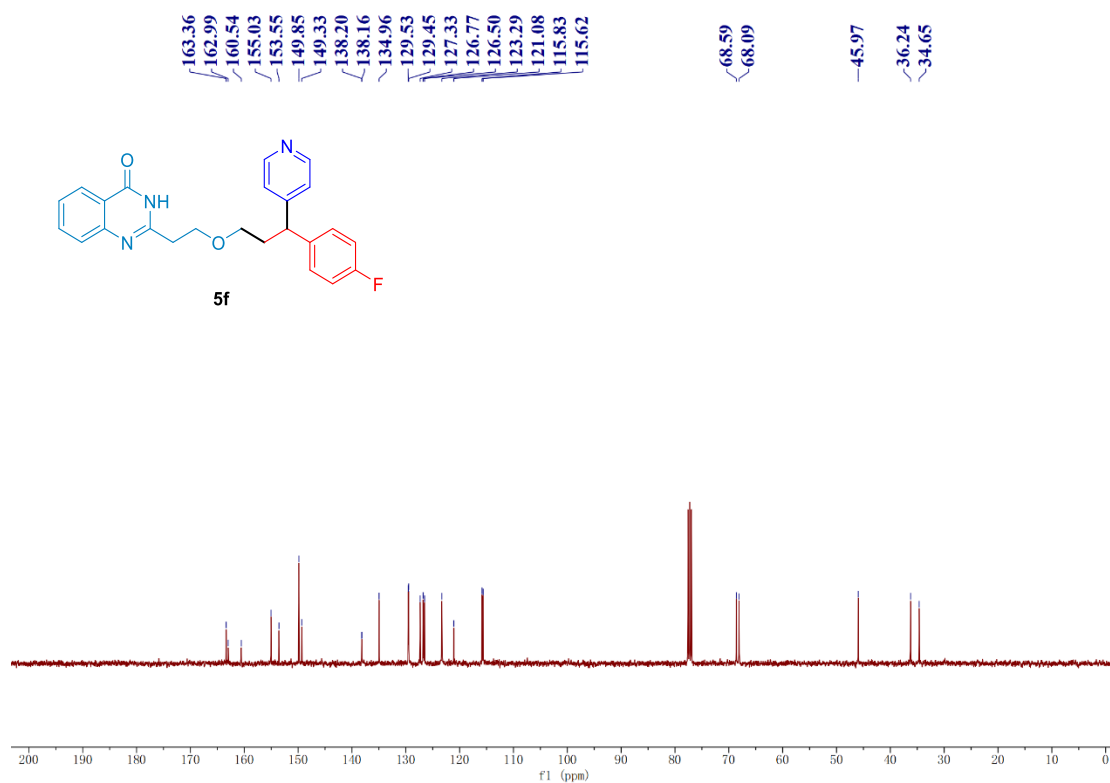



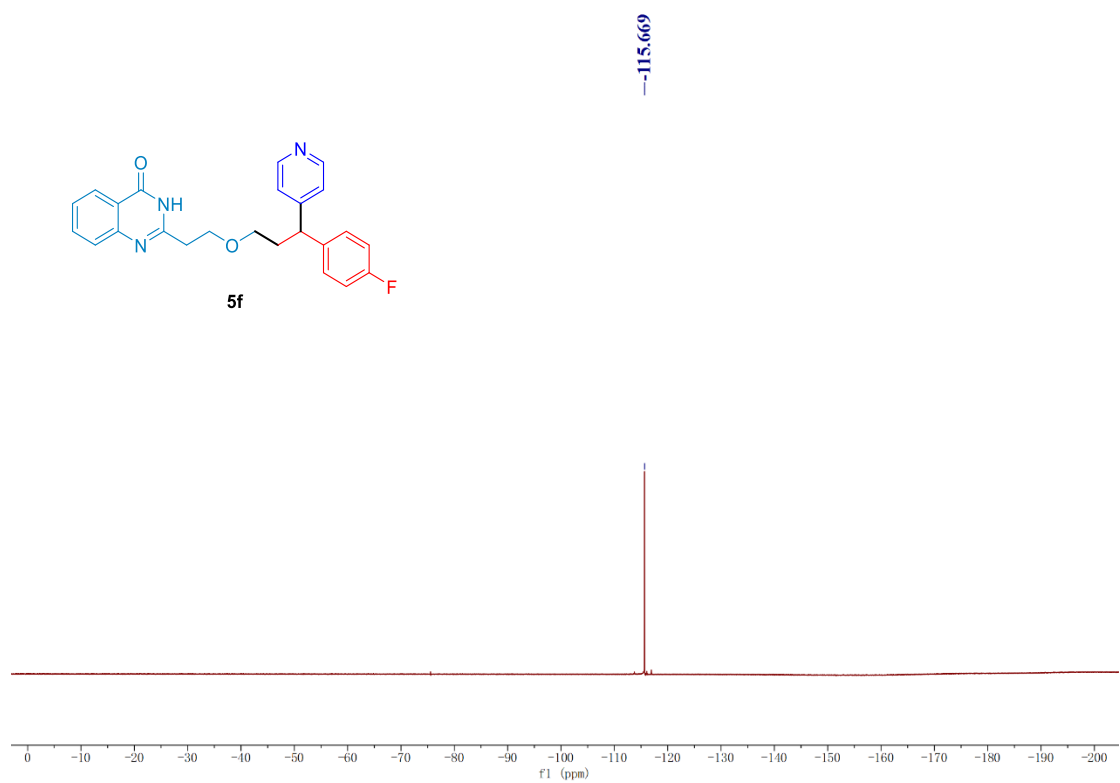

$^1\text{H}$  NMR (400 MHz,  $\text{CDCl}_3$ ) and  $^{13}\text{C}$  NMR (100 MHz,  $\text{CDCl}_3$ ) spectra of product **5g**

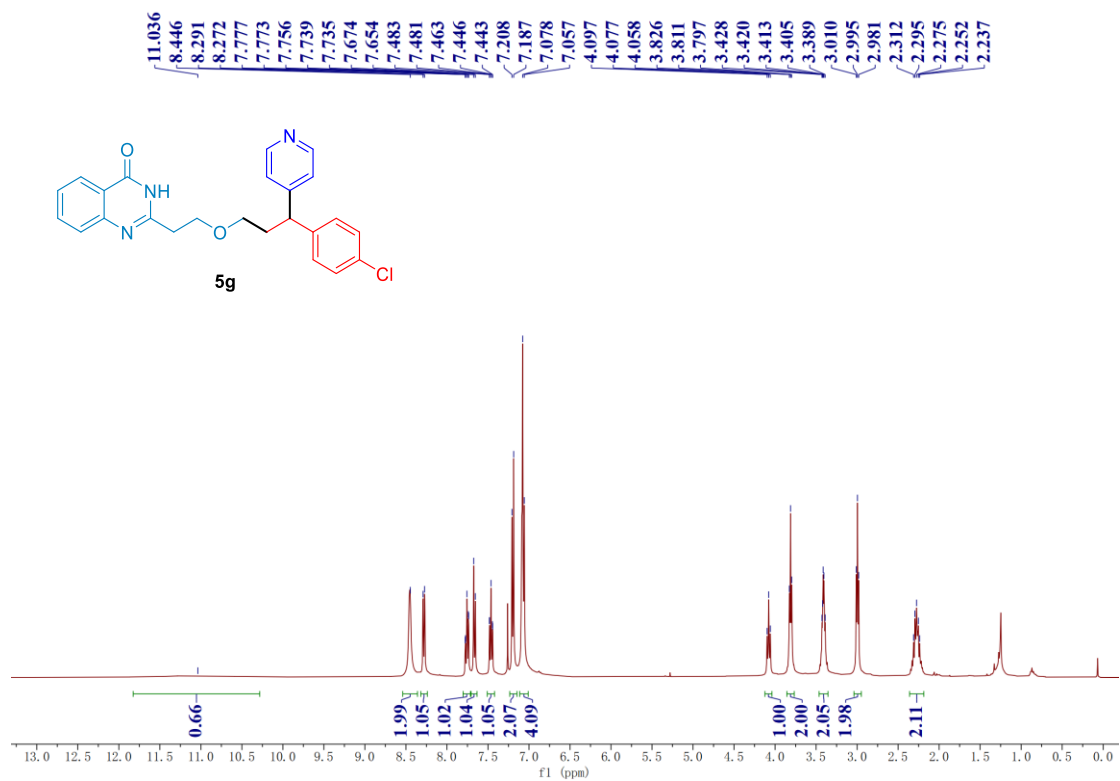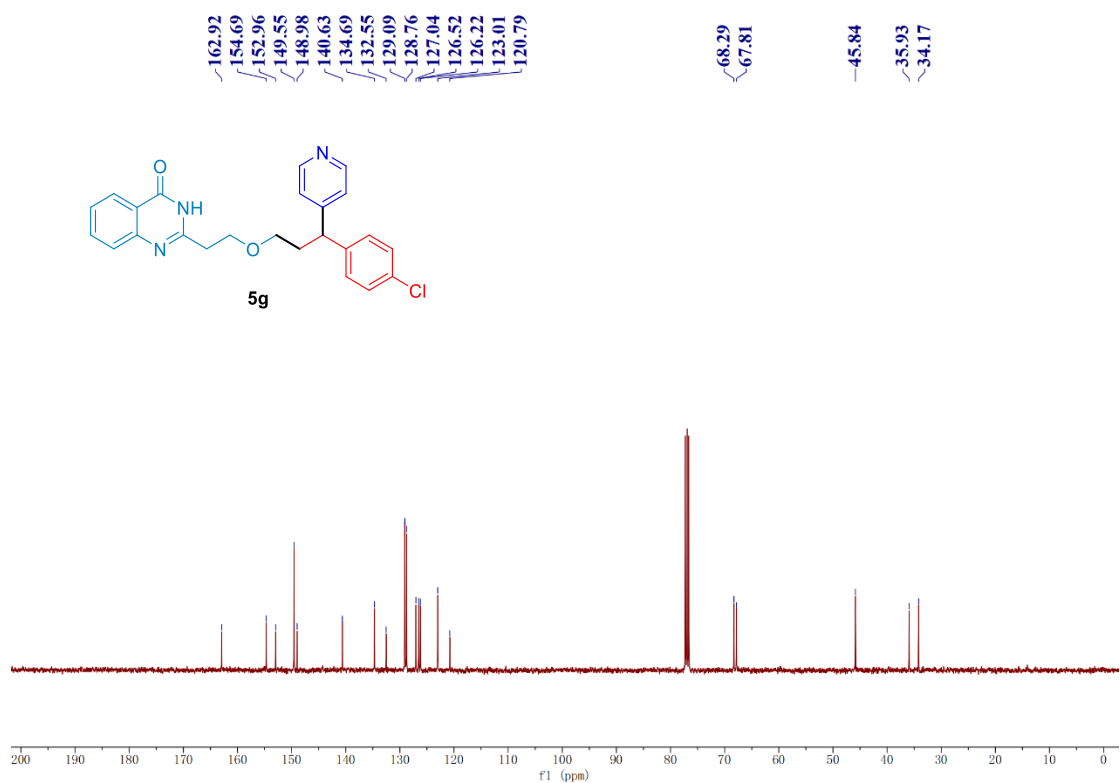

$^1\text{H}$  NMR (400 MHz,  $\text{CDCl}_3$ ) and  $^{13}\text{C}$  NMR (100 MHz,  $\text{CDCl}_3$ ) spectra of product **5h**

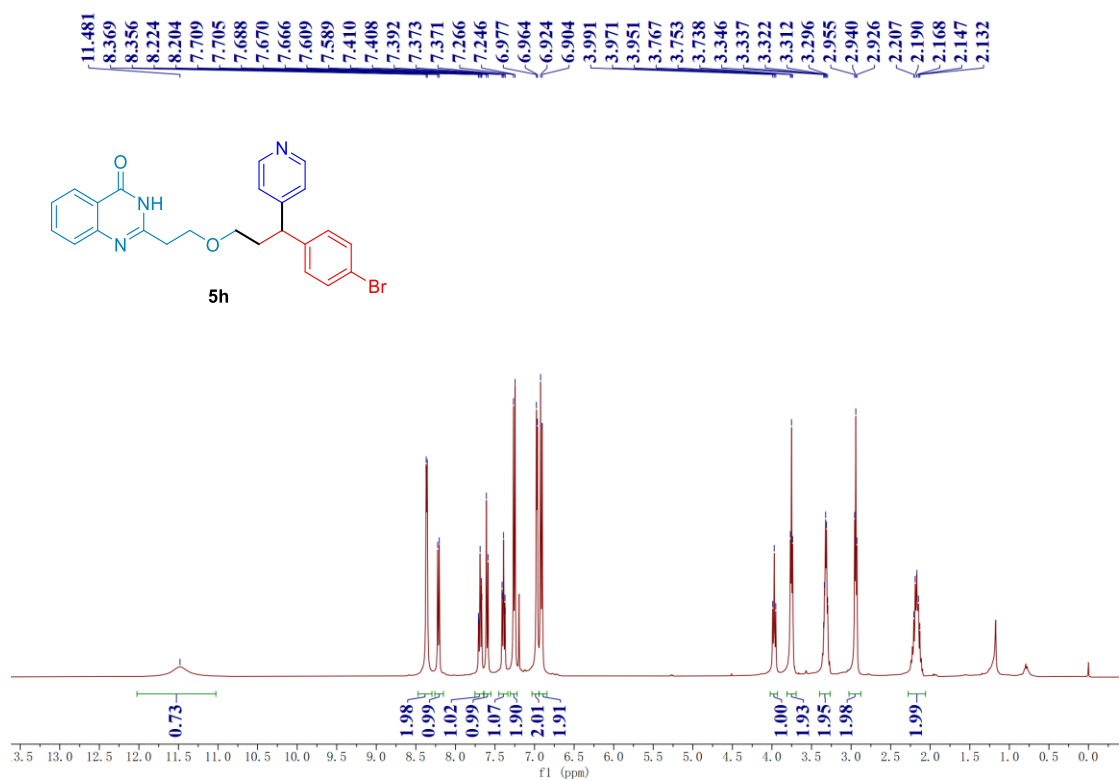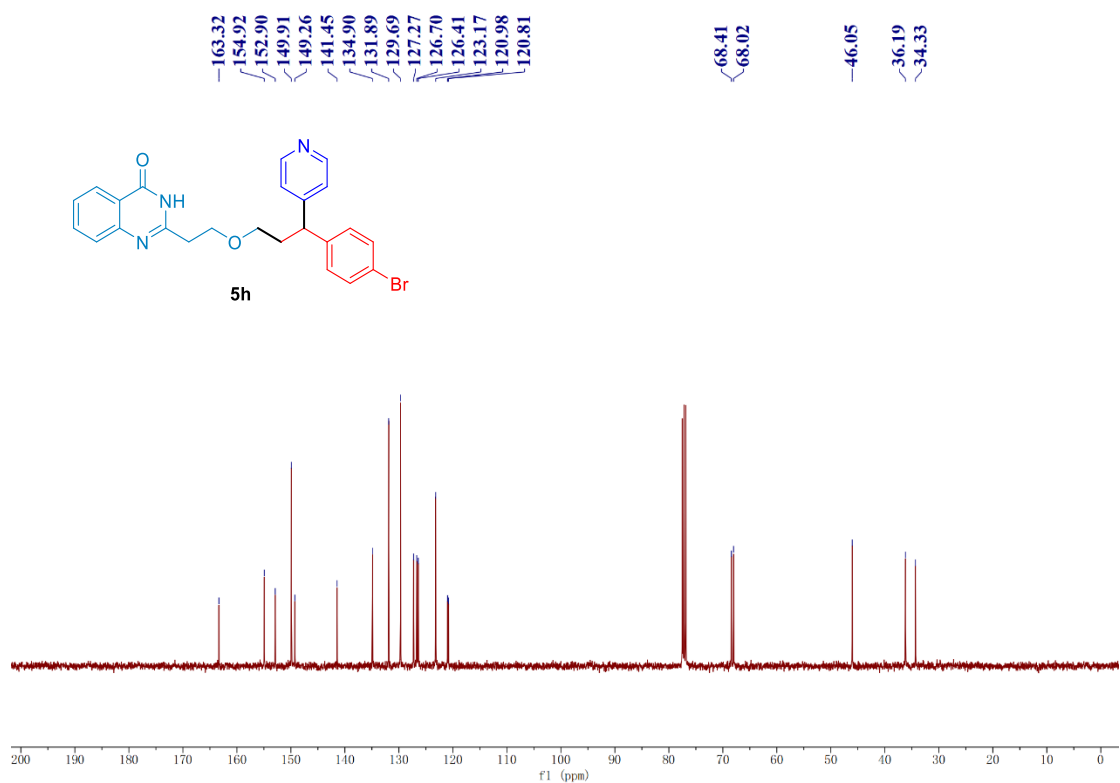

$^1\text{H}$  NMR (400 MHz,  $\text{CDCl}_3$ ) and  $^{13}\text{C}$  NMR (100 MHz,  $\text{CDCl}_3$ ) spectra of product **5i**

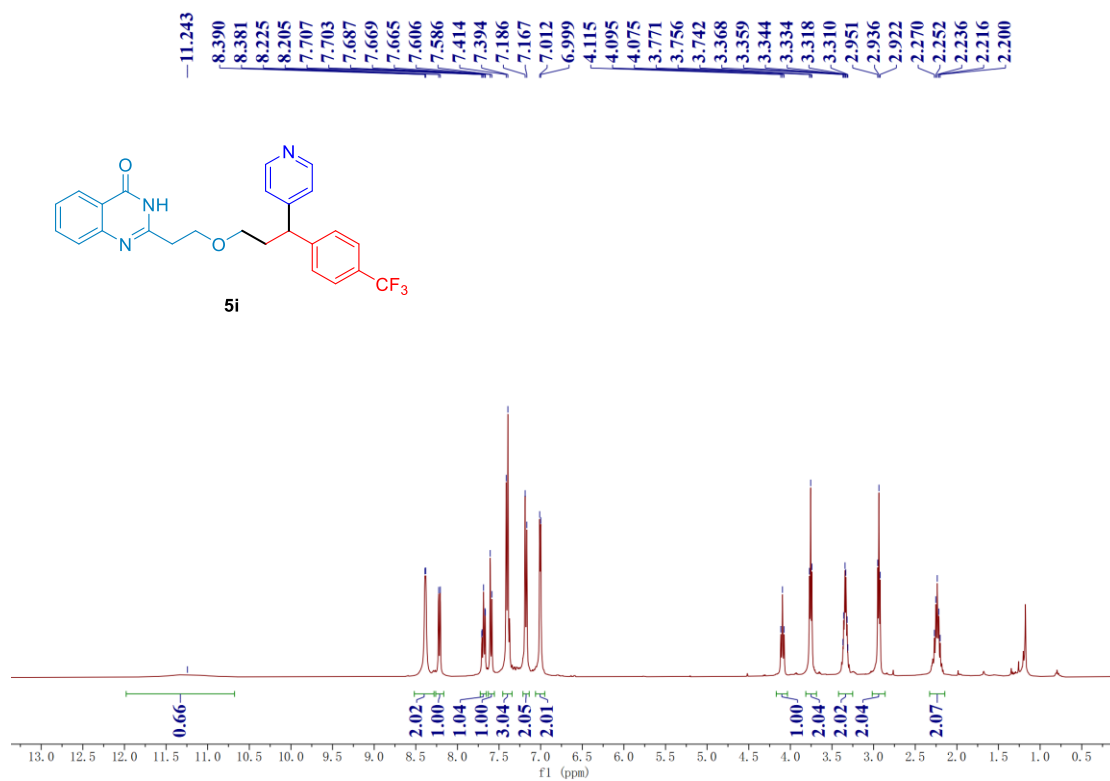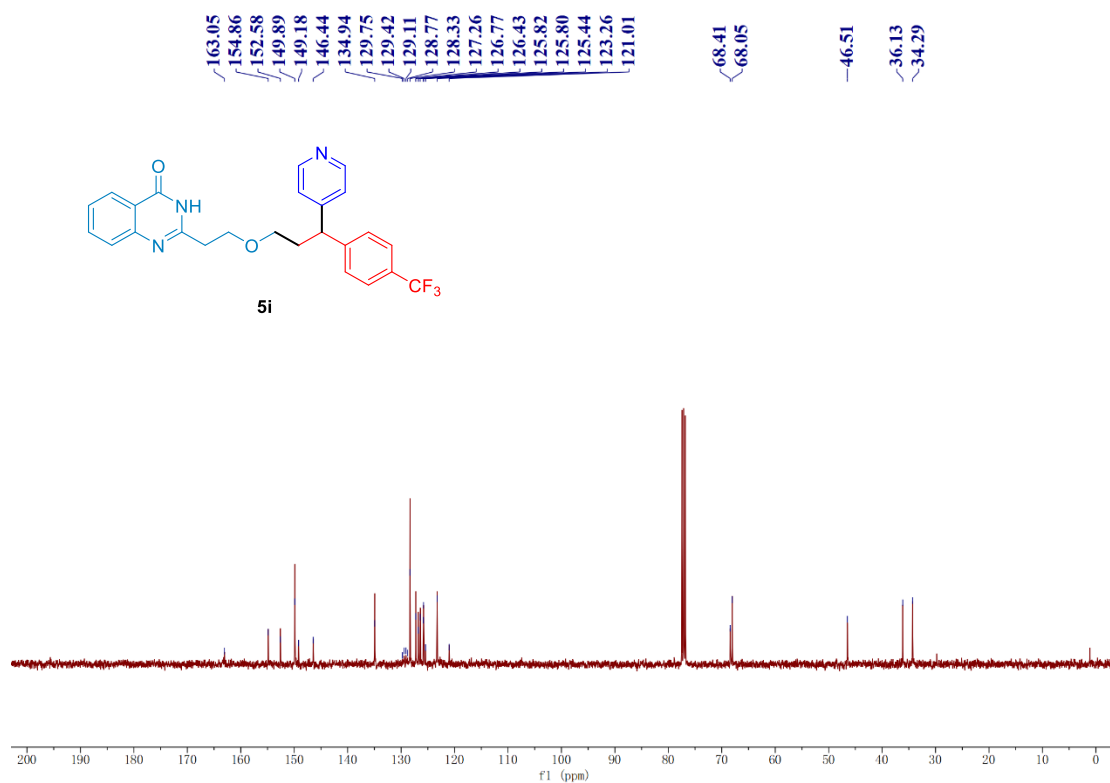

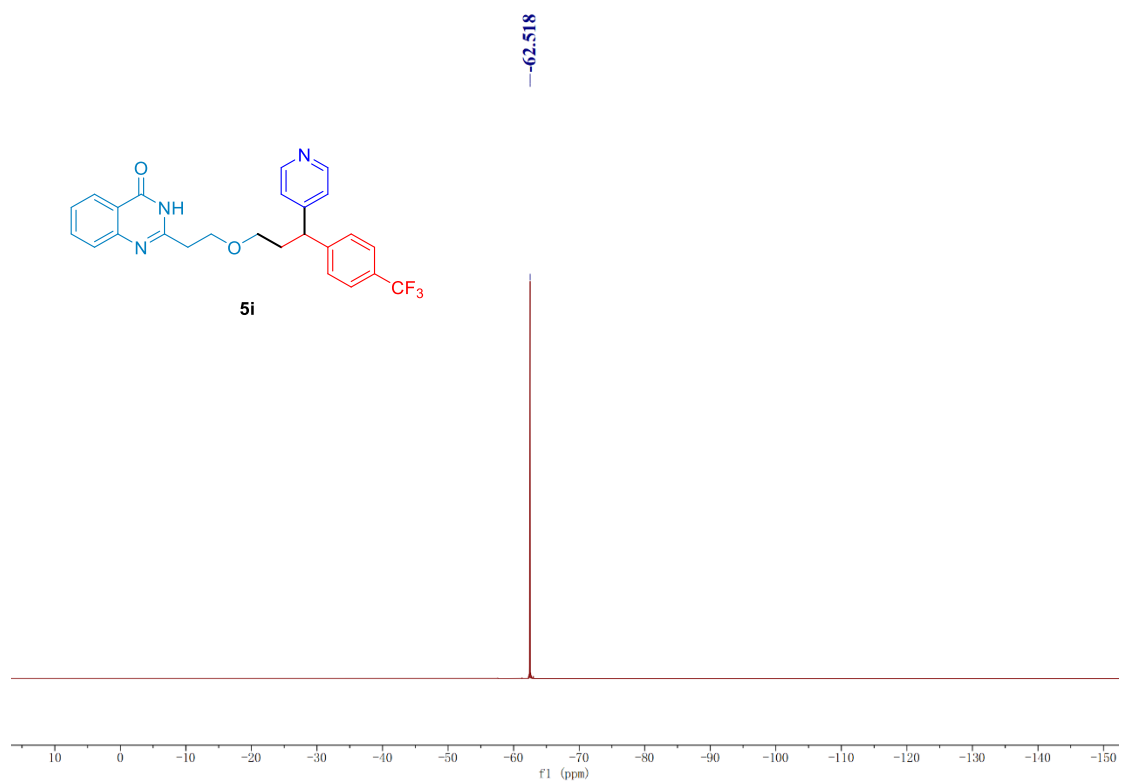

$^1\text{H}$  NMR (400 MHz,  $\text{CDCl}_3$ ) and  $^{13}\text{C}$  NMR (100 MHz,  $\text{CDCl}_3$ ) spectra of product **5j**

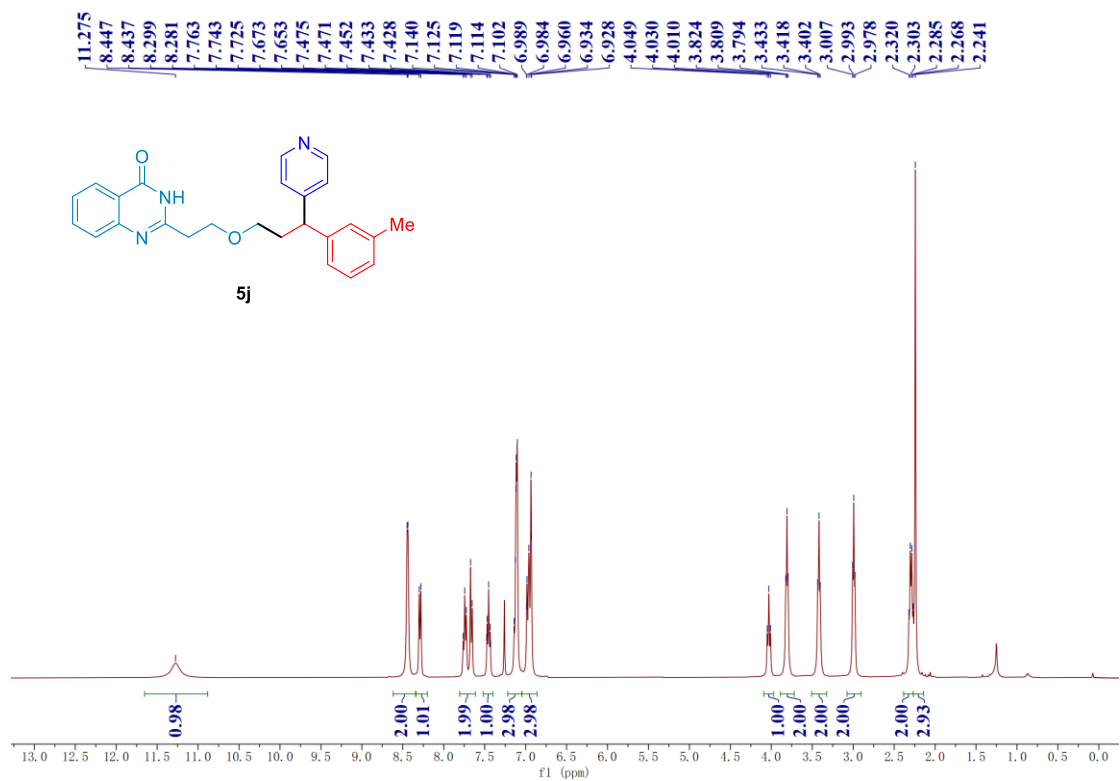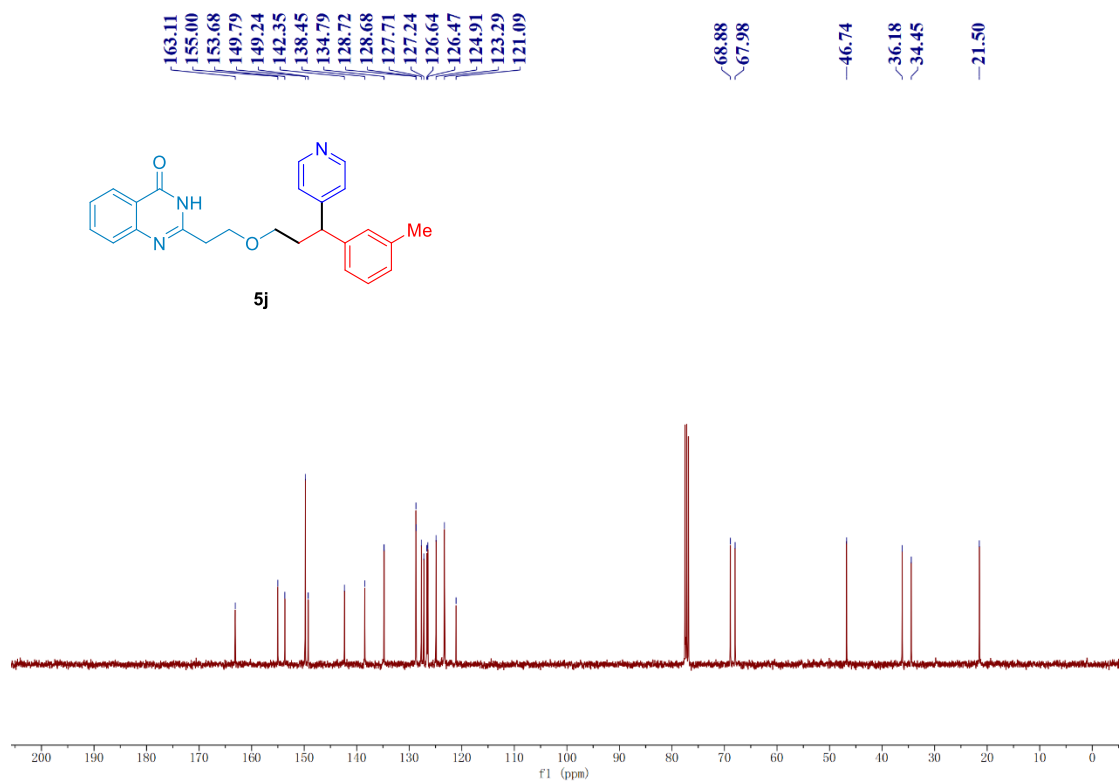

$^1\text{H}$  NMR (400 MHz,  $\text{CDCl}_3$ ) and  $^{13}\text{C}$  NMR (100 MHz,  $\text{CDCl}_3$ ) spectra of product **5k**

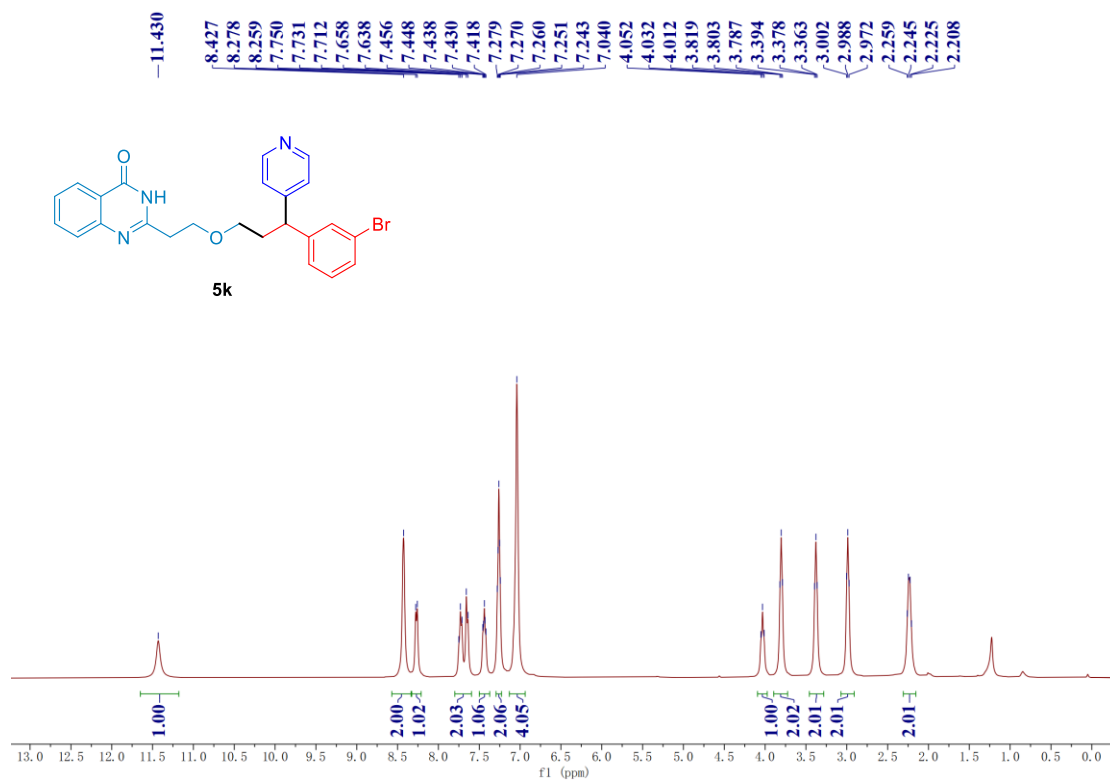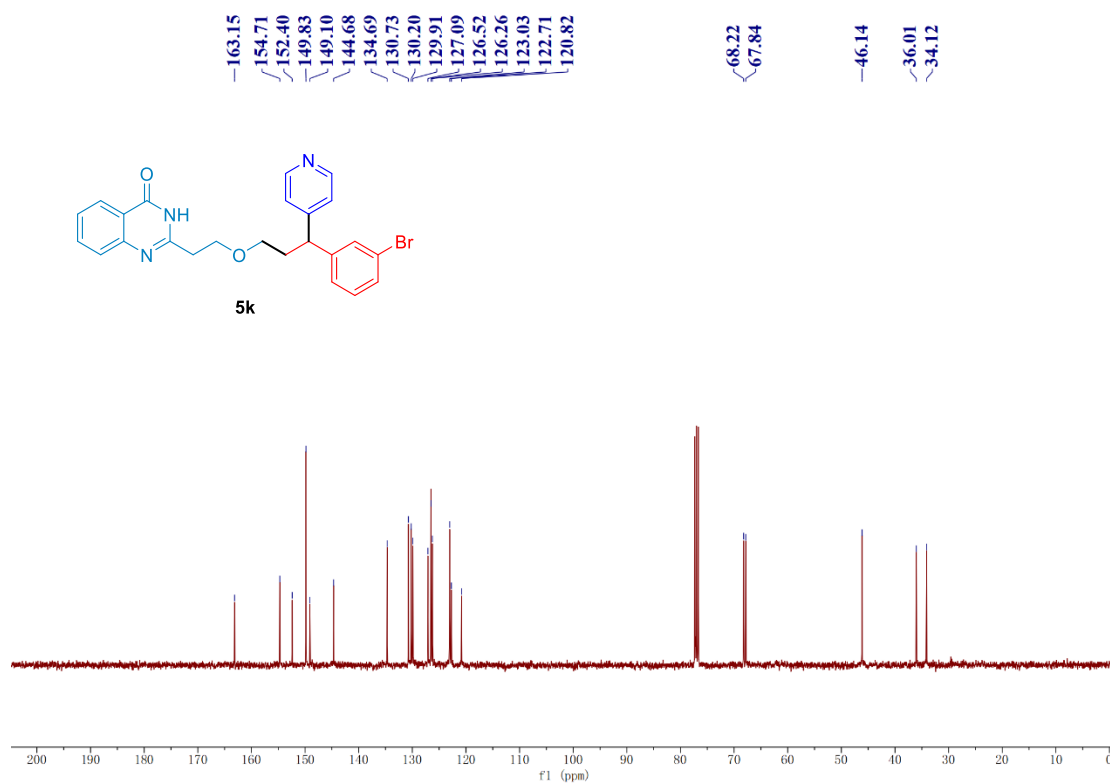

$^1\text{H}$  NMR (400 MHz,  $\text{CDCl}_3$ ) and  $^{13}\text{C}$  NMR (100 MHz,  $\text{CDCl}_3$ ) spectra of product **51**

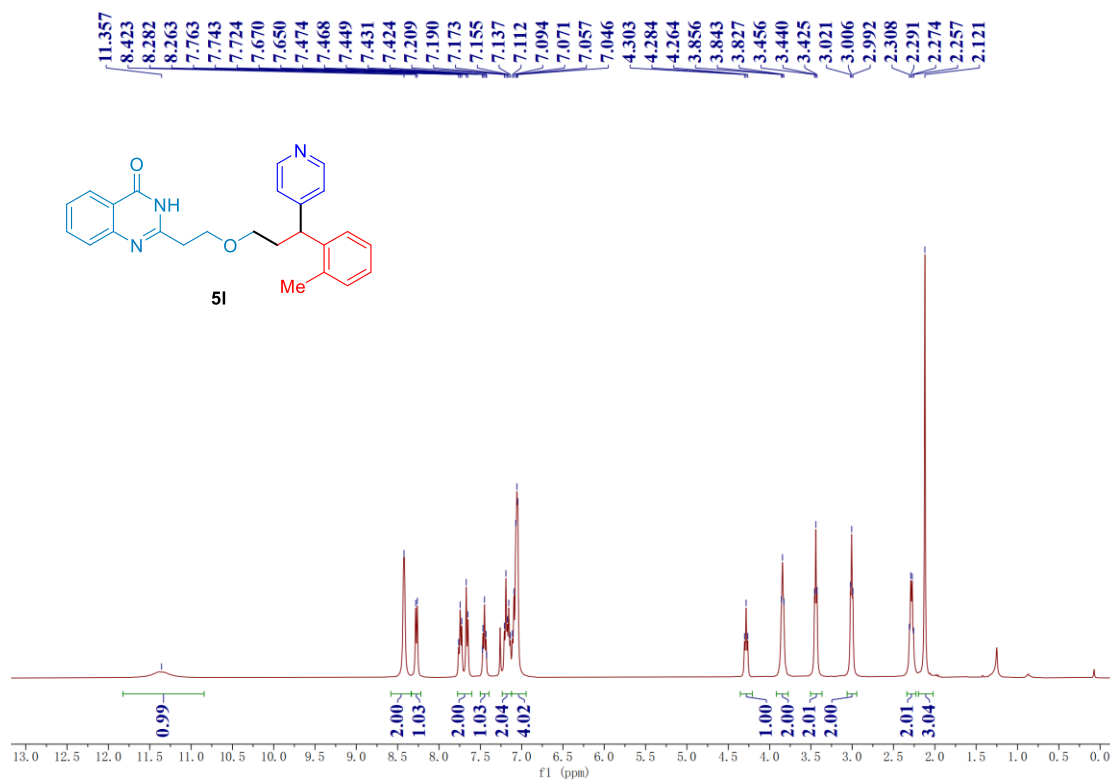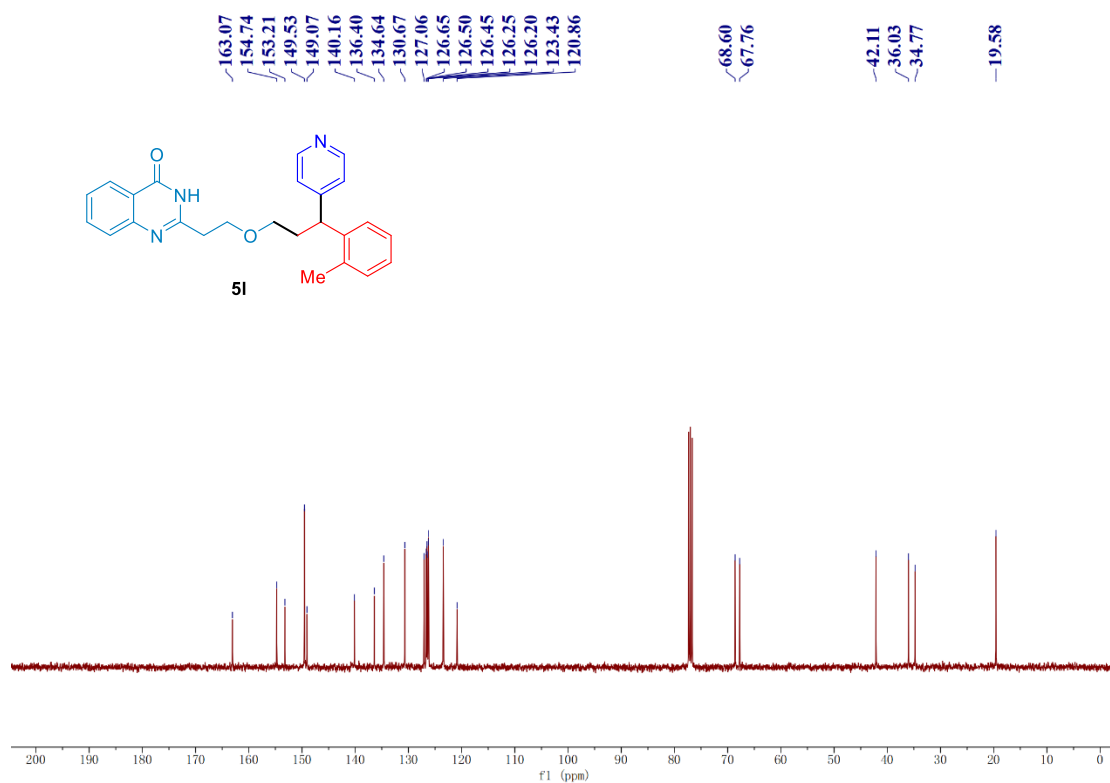



$^1\text{H}$  NMR (400 MHz,  $\text{CDCl}_3$ ) and  $^{13}\text{C}$  NMR (100 MHz,  $\text{CDCl}_3$ ) spectra of product **5m**

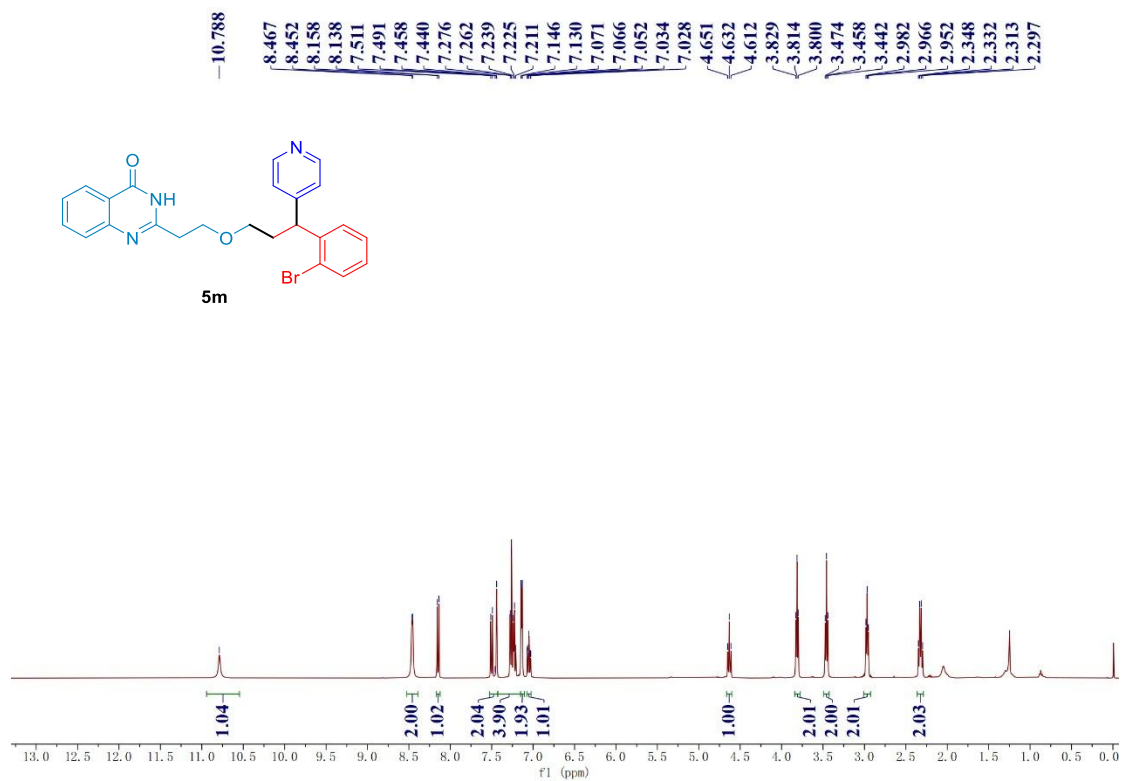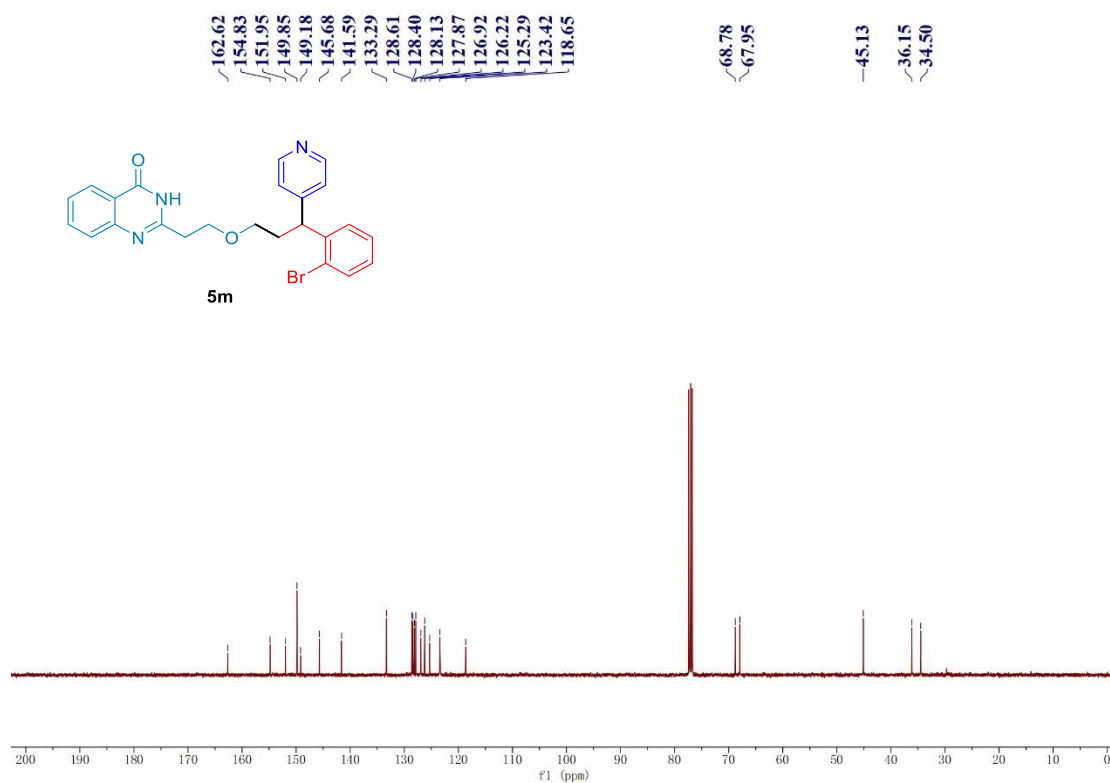

Chemical structure of **5n** is shown as an inset. The structure consists of a benzimidazole core substituted with a 2-(naphthalen-1-yl)-2-(pyridin-2-yl)ethoxy group.

<sup>1</sup>H NMR spectrum (CDCl<sub>3</sub>) of **5n** is displayed below the structure. The x-axis represents the chemical shift in ppm (f1), ranging from 13.0 to 0.5. The spectrum shows several peaks, with integration values indicated below the baseline and a list of peak chemical shifts provided on the right.

Integration values (from left to right): 0.67, 1.98, 1.02, 6.02, 3.02, 3.02, 1.00, 2.04, 2.08, 2.06, 2.07.

Peak chemical shifts (ppm): 10.788, 8.480, 8.311, 8.292, 7.770, 7.754, 7.745, 7.730, 7.709, 7.674, 7.652, 7.486, 7.467, 7.448, 7.442, 7.433, 7.423, 7.229, 7.213, 4.287, 3.805, 3.798, 3.791, 3.776, 3.475, 3.467, 3.459, 3.443, 3.002, 2.988, 2.974, 2.439, 2.421, 2.405.

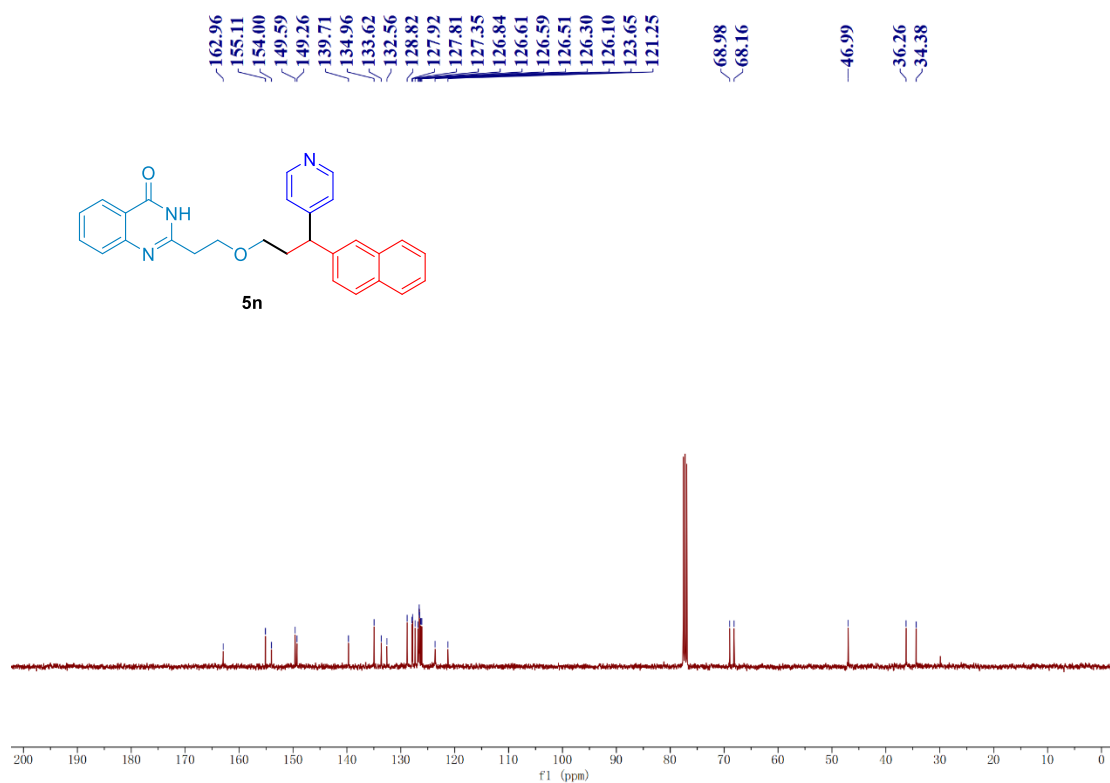

$^1\text{H}$  NMR (400 MHz,  $\text{CDCl}_3$ ) and  $^{13}\text{C}$  NMR (100 MHz,  $\text{CDCl}_3$ ) spectra of product **5o**

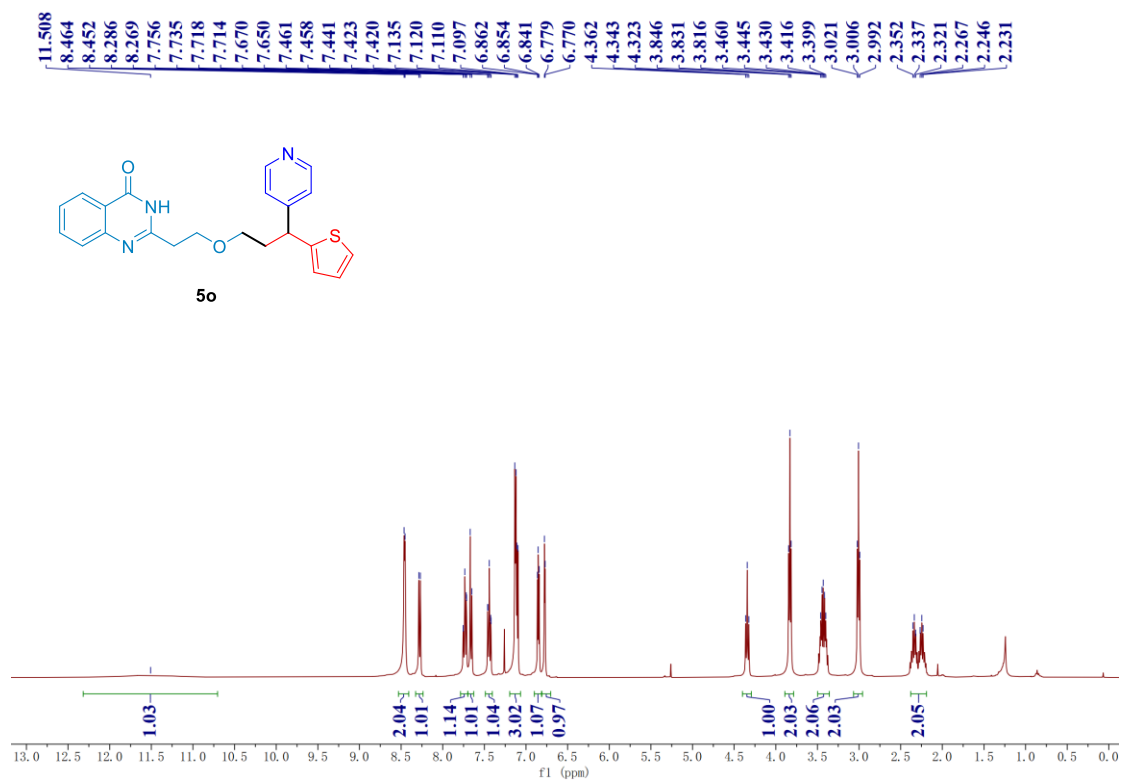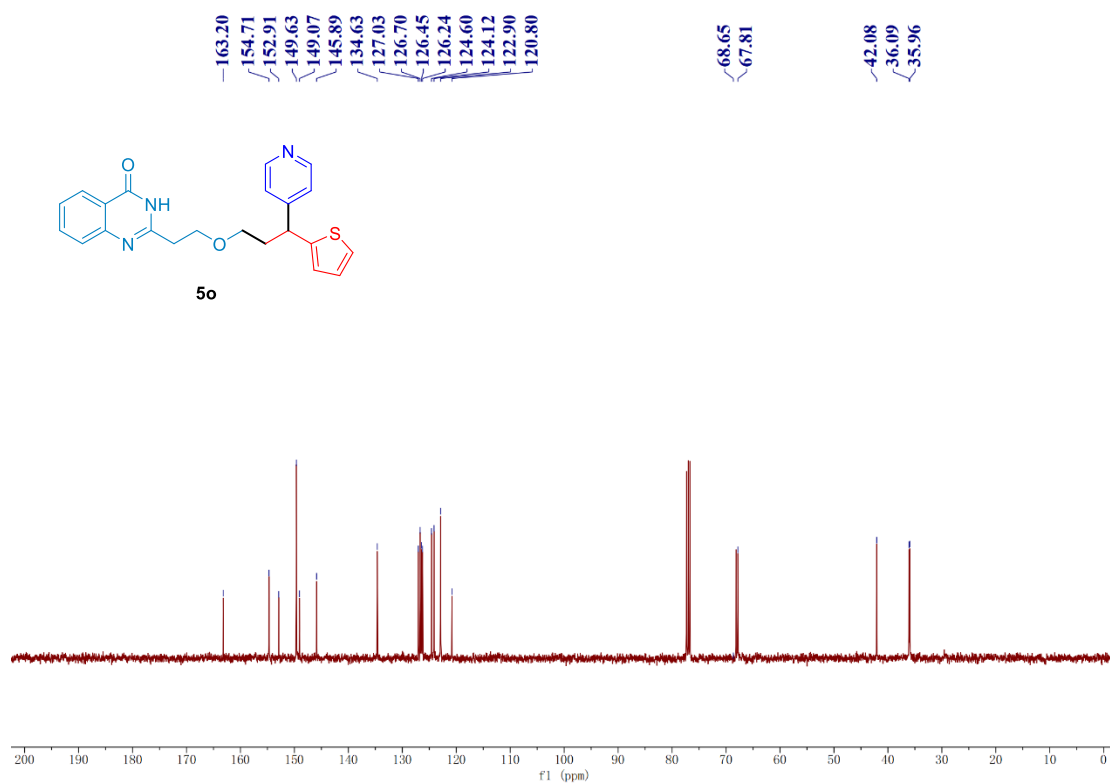

$^1\text{H}$  NMR (400 MHz,  $\text{CDCl}_3$ ) and  $^{13}\text{C}$  NMR (100 MHz,  $\text{CDCl}_3$ ) spectra of product **5p**

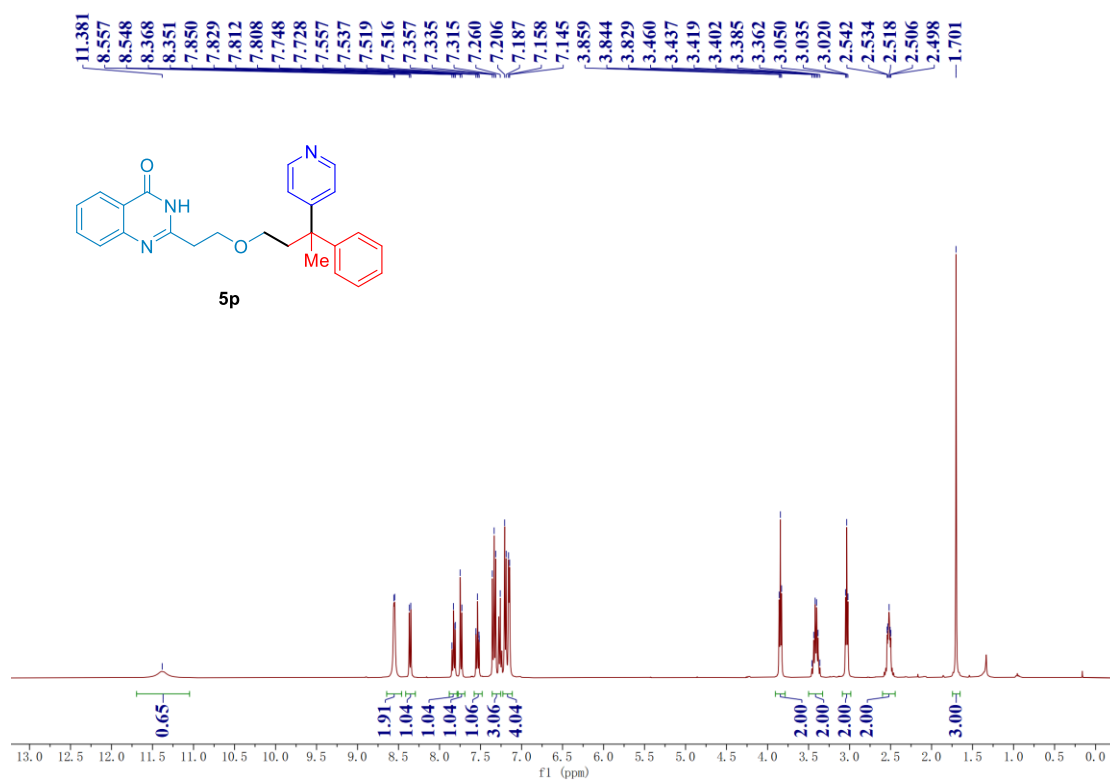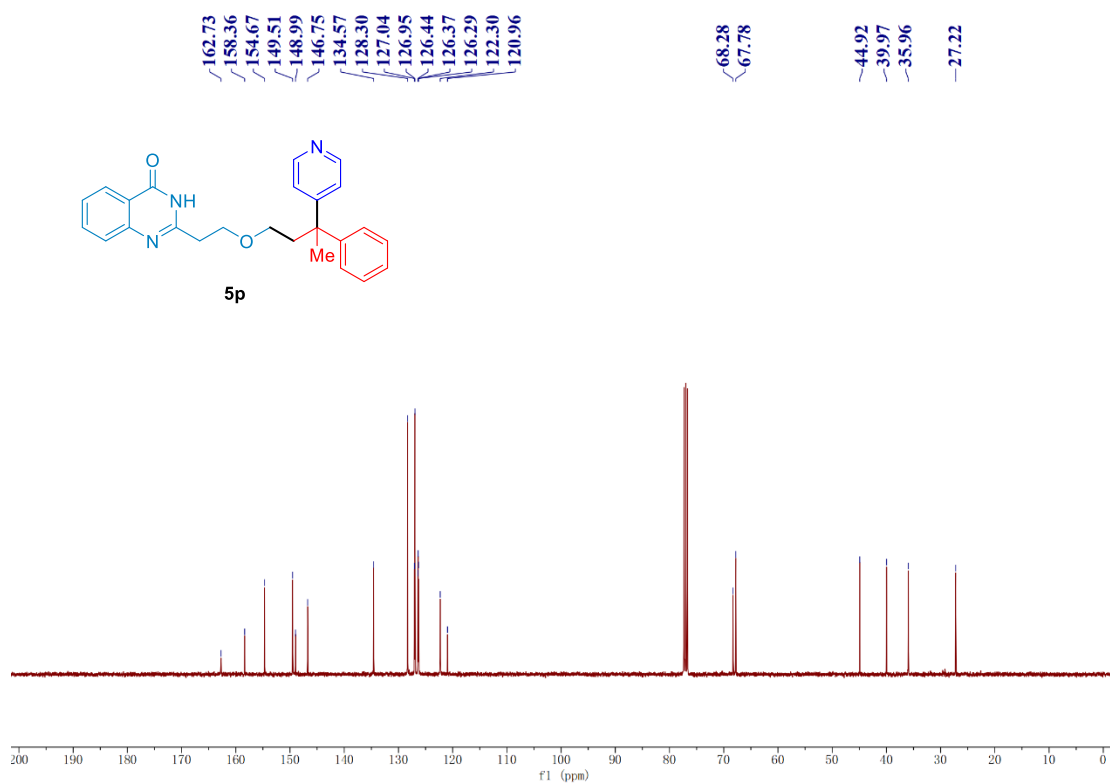

$^1\text{H}$  NMR (400 MHz,  $\text{CDCl}_3$ ) and  $^{13}\text{C}$  NMR (100 MHz,  $\text{CDCl}_3$ ) spectra of product **6a**

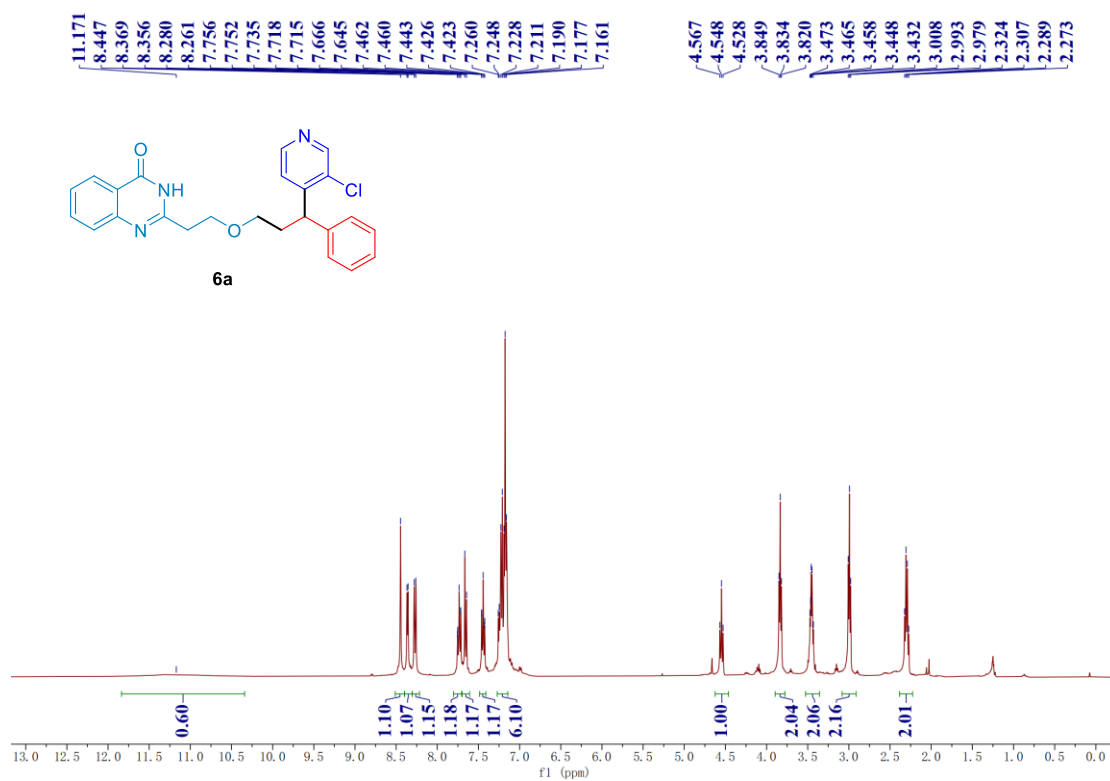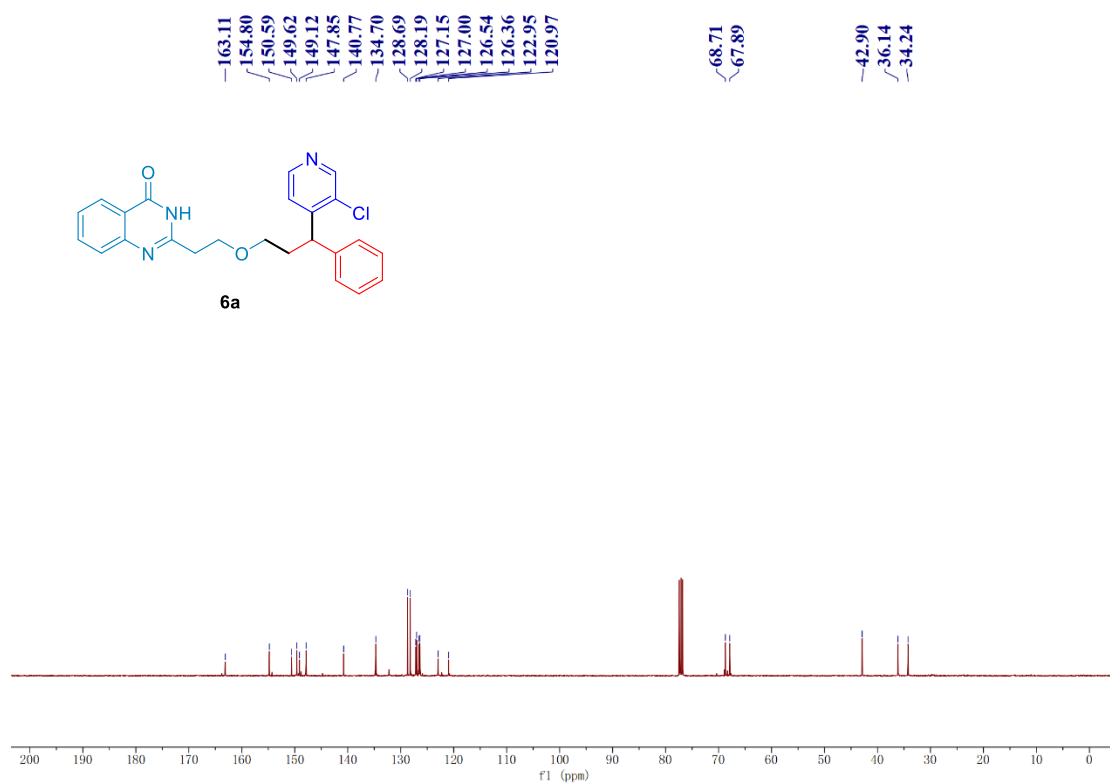

$^1\text{H}$  NMR (400 MHz,  $\text{CDCl}_3$ ) and  $^{13}\text{C}$  NMR (100 MHz,  $\text{CDCl}_3$ ) spectra of product **6b**

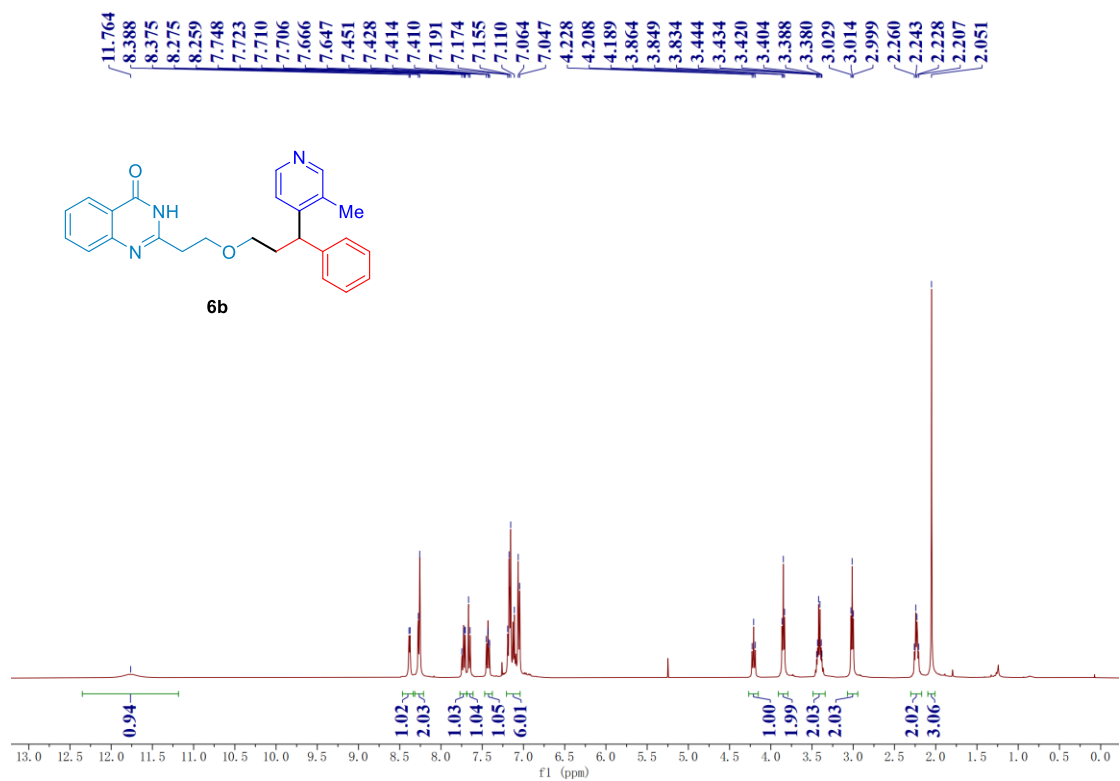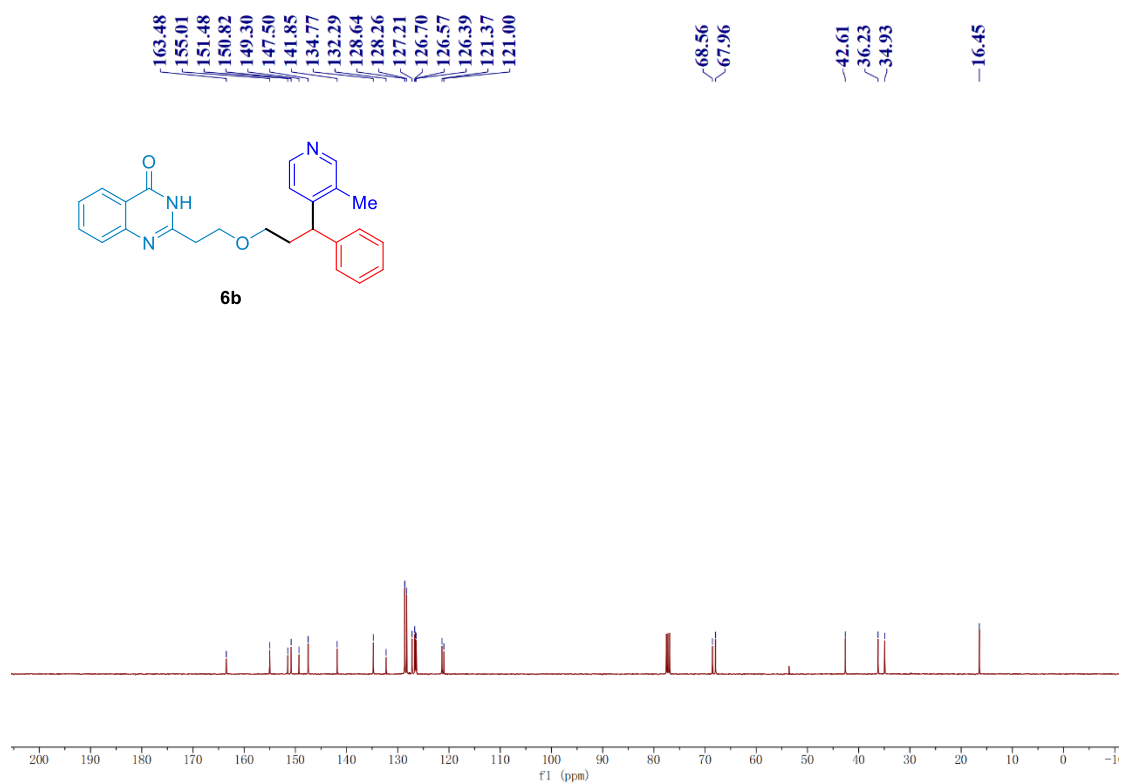

$^1\text{H}$  NMR (400 MHz,  $\text{CDCl}_3$ ) and  $^{13}\text{C}$  NMR (100 MHz,  $\text{CDCl}_3$ ) spectra of product **6c**

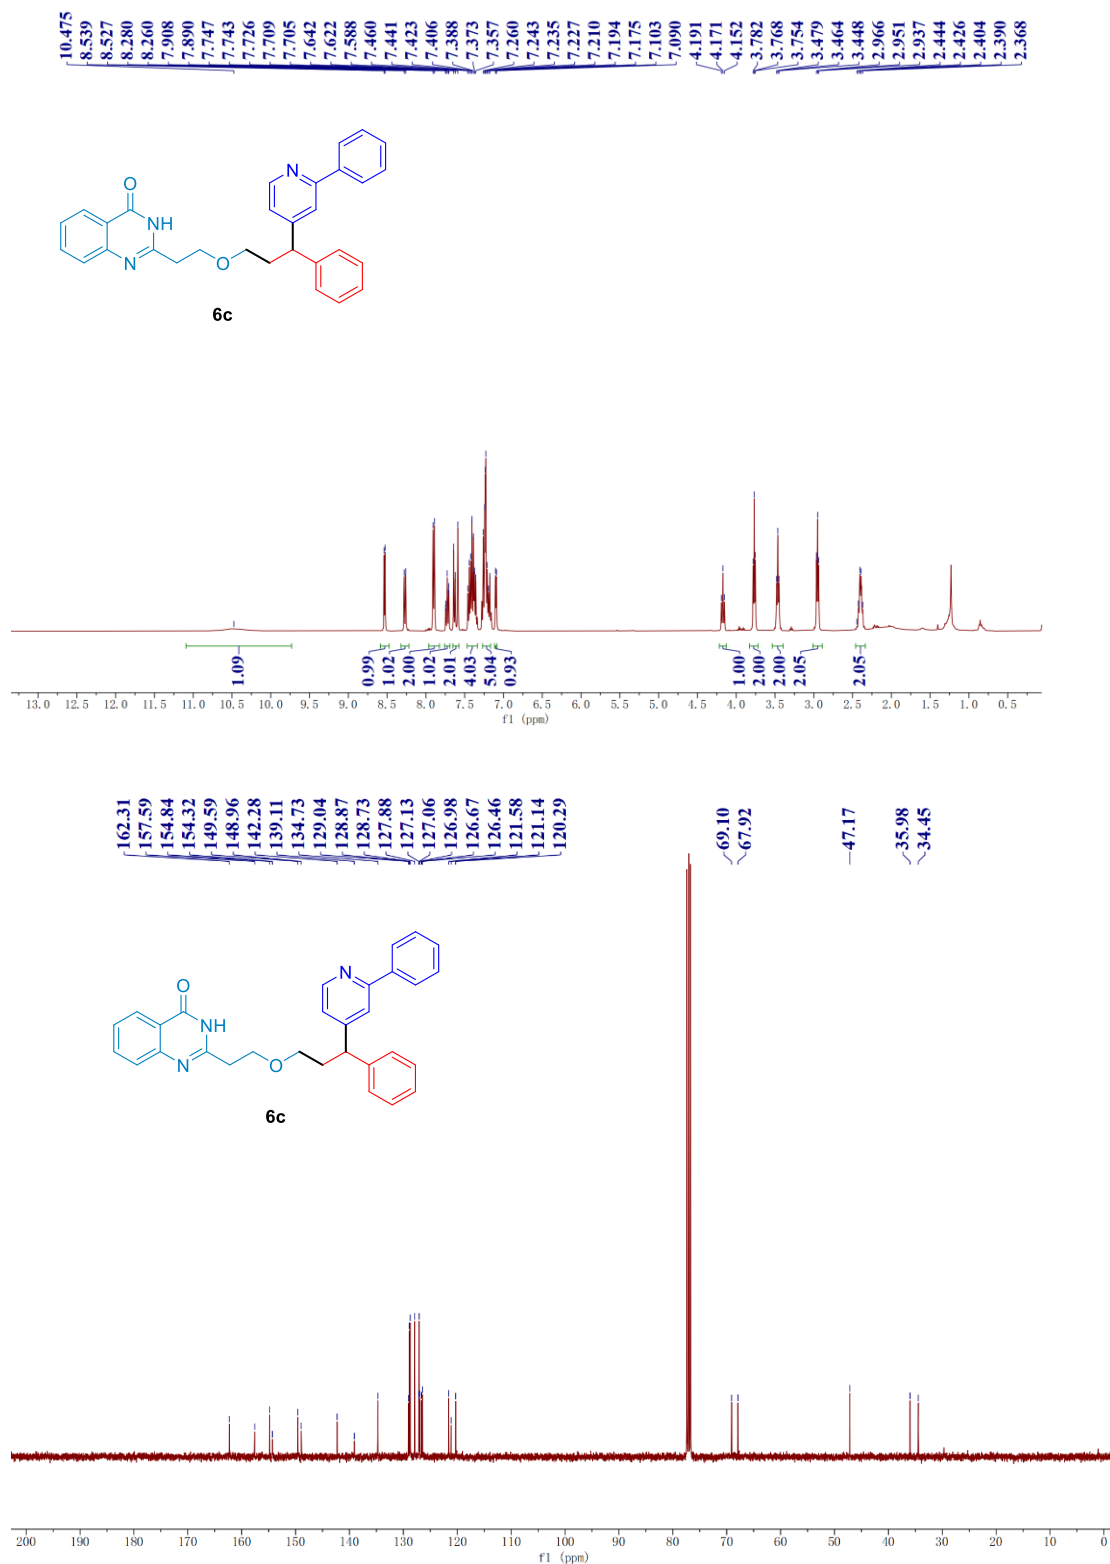

$^1\text{H}$  NMR (400 MHz,  $\text{CDCl}_3$ ) and  $^{13}\text{C}$  NMR (100 MHz,  $\text{CDCl}_3$ ) spectra of product **6d**

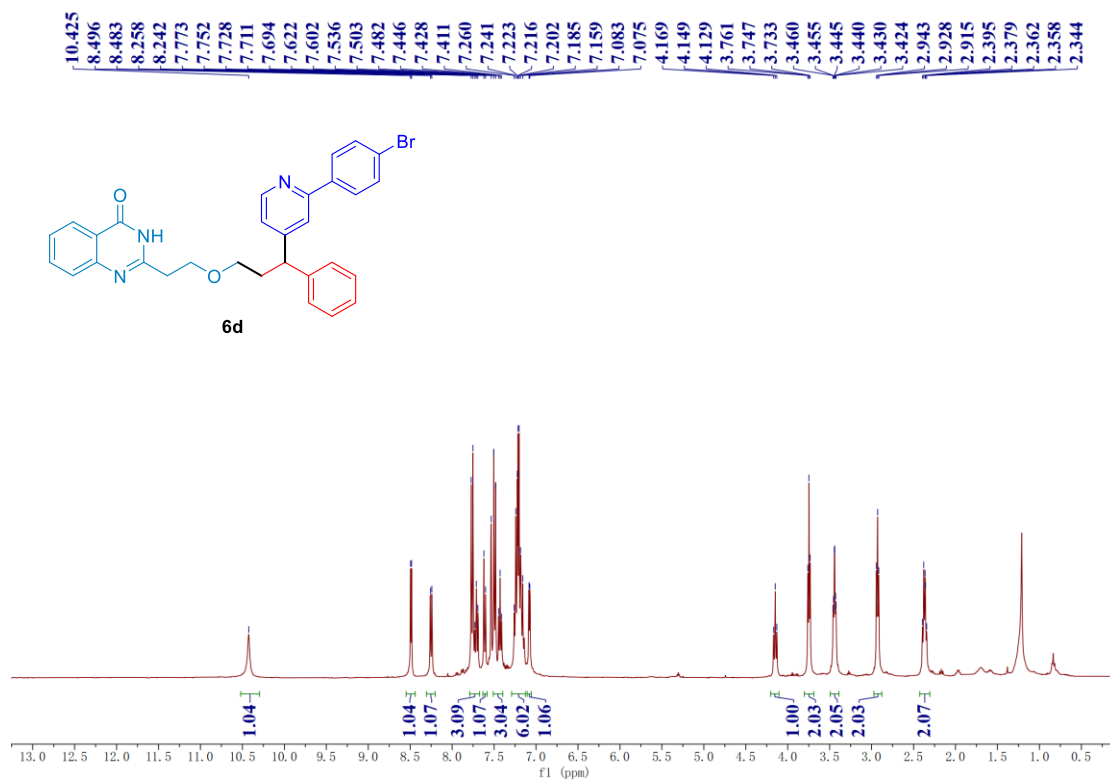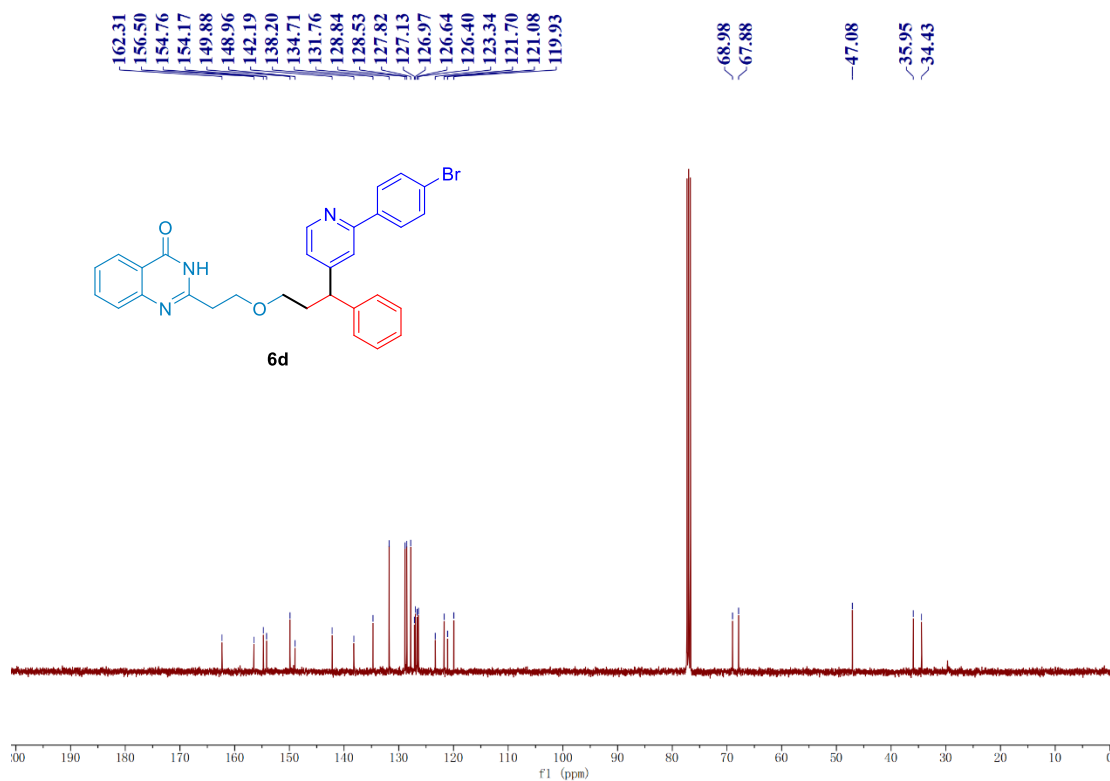



$^1\text{H}$  NMR (400 MHz,  $\text{CDCl}_3$ ) and  $^{13}\text{C}$  NMR (100 MHz,  $\text{CDCl}_3$ ) spectra of product **6e**

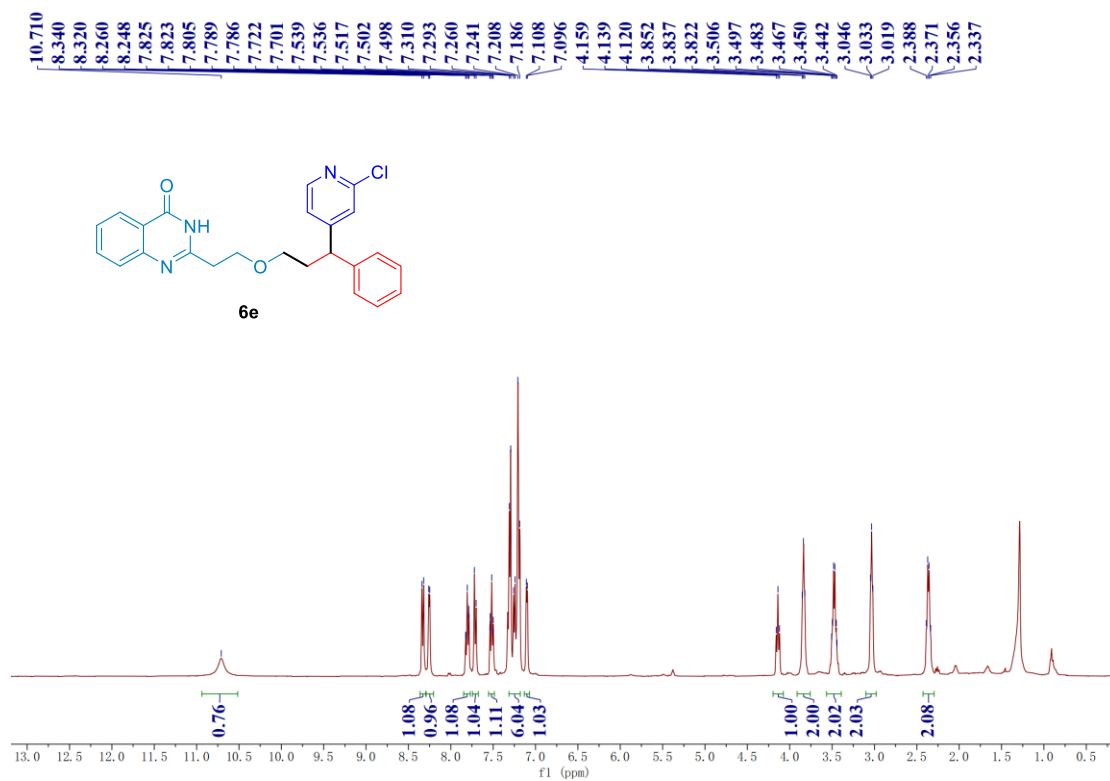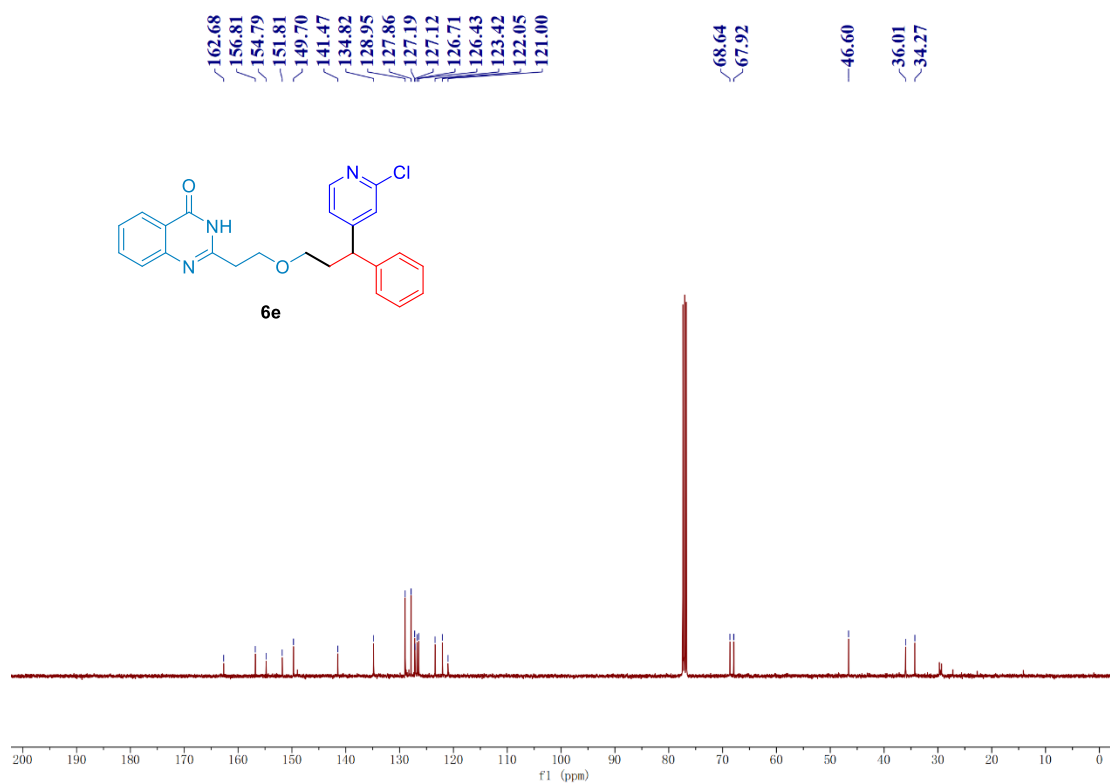

$^1\text{H}$  NMR (400 MHz,  $\text{CDCl}_3$ ) and  $^{13}\text{C}$  NMR (100 MHz,  $\text{CDCl}_3$ ) spectra of product **6f**

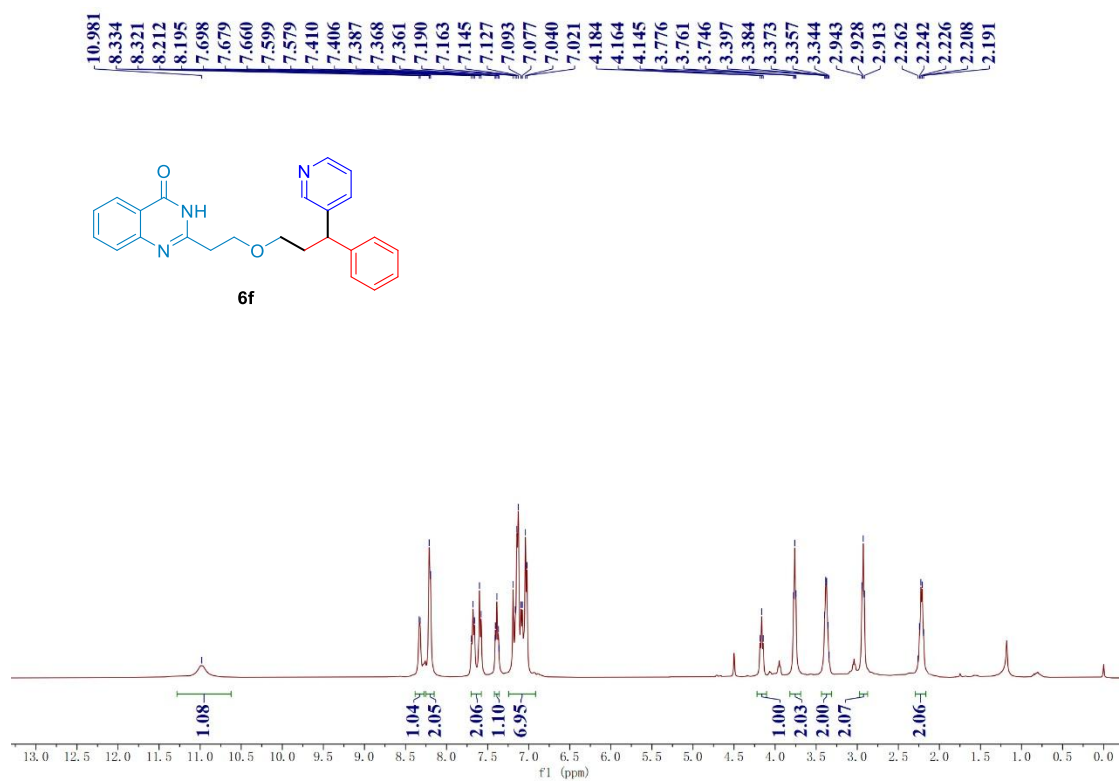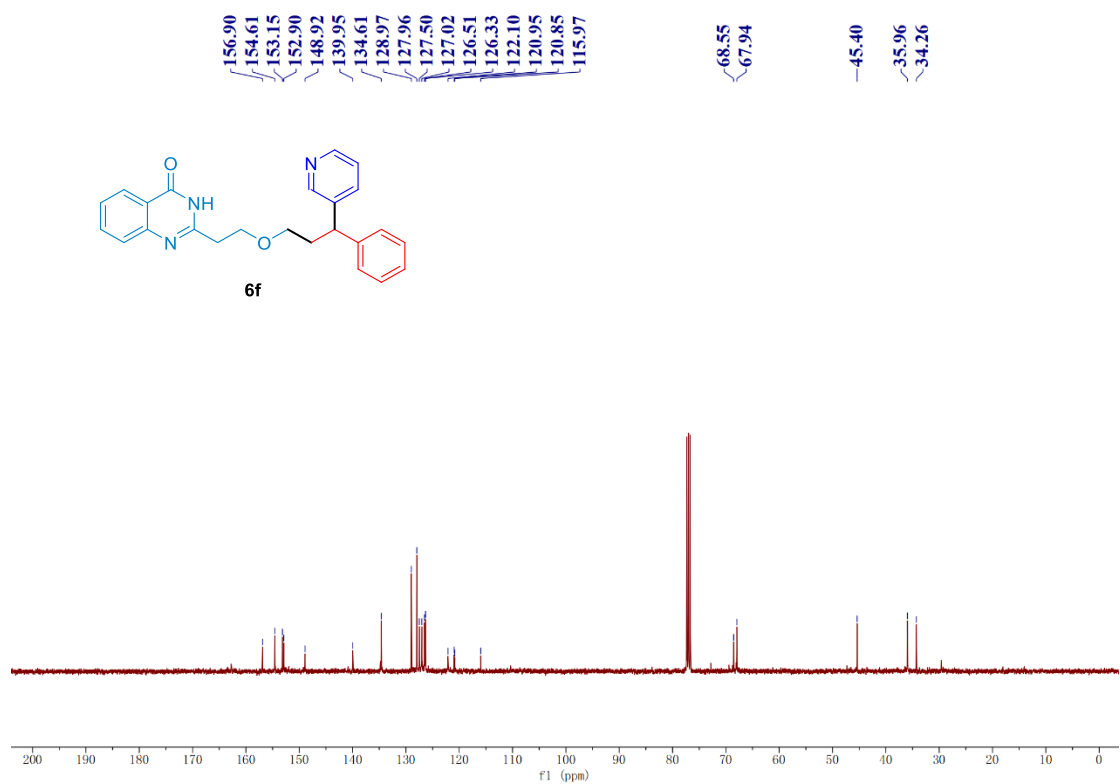

$^1\text{H}$  NMR (400 MHz,  $\text{CDCl}_3$ ) and  $^{13}\text{C}$  NMR (100 MHz,  $\text{CDCl}_3$ ) spectra of product **7a**

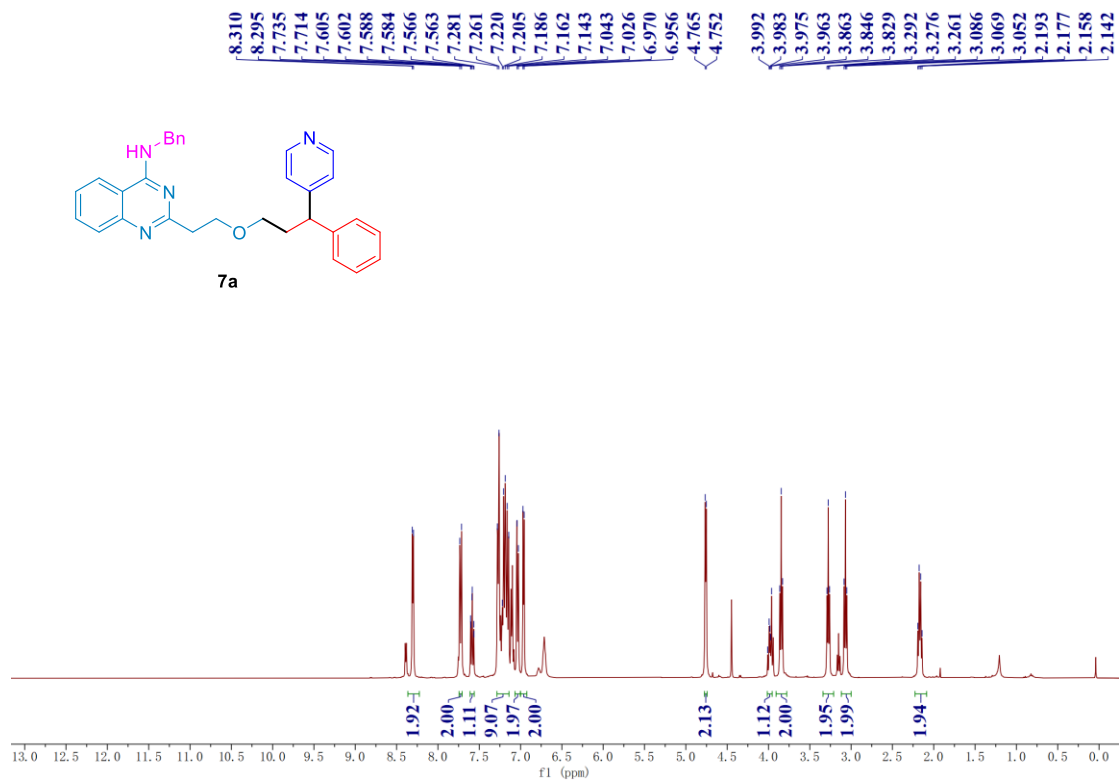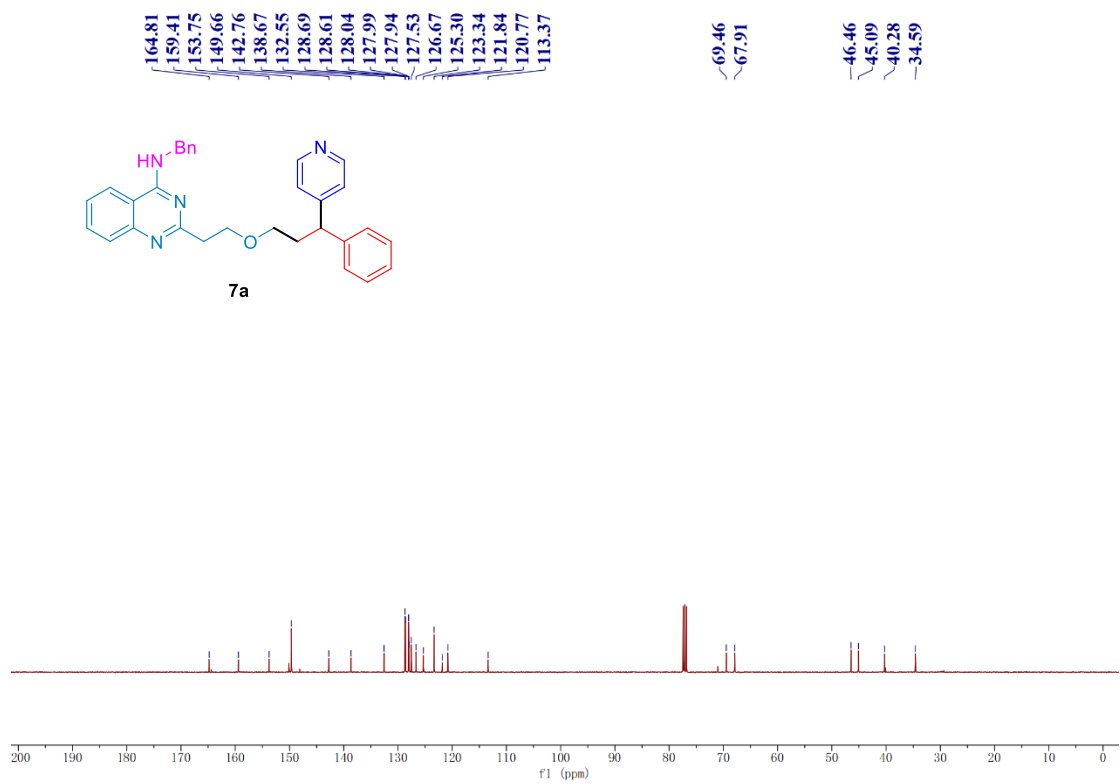

$^1\text{H}$  NMR (400 MHz,  $\text{CDCl}_3$ ) and  $^{13}\text{C}$  NMR (100 MHz,  $\text{CDCl}_3$ ) spectra of product **7b**

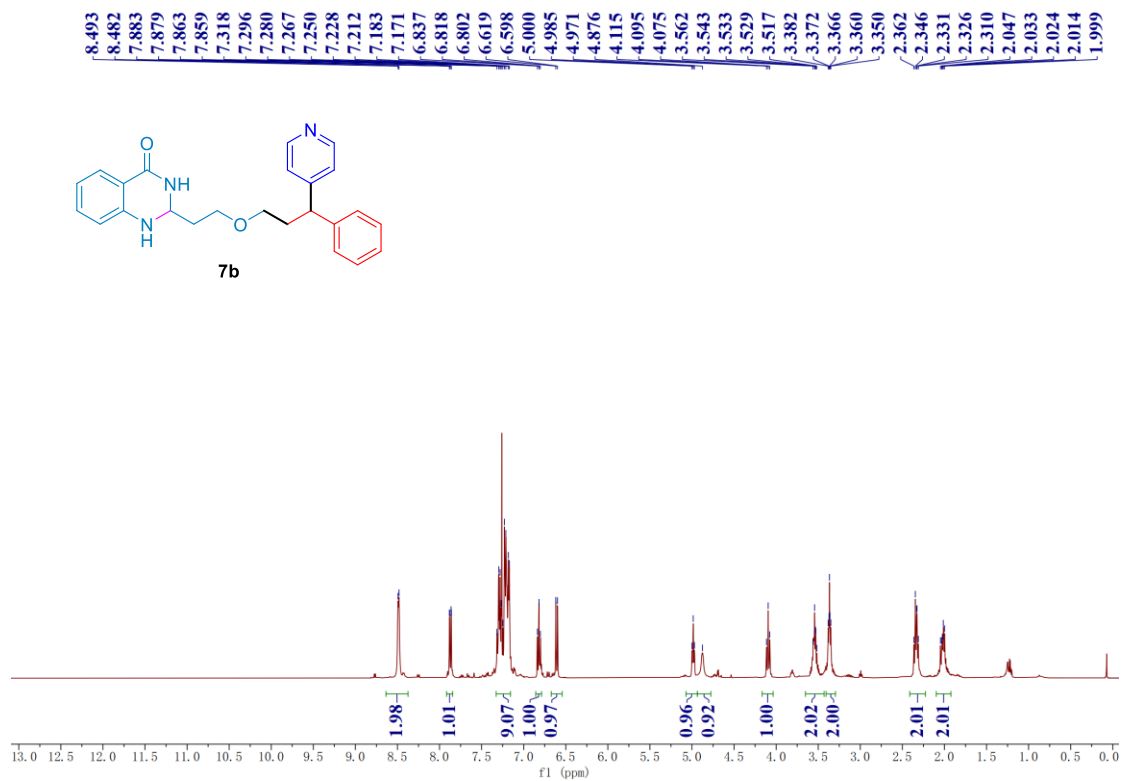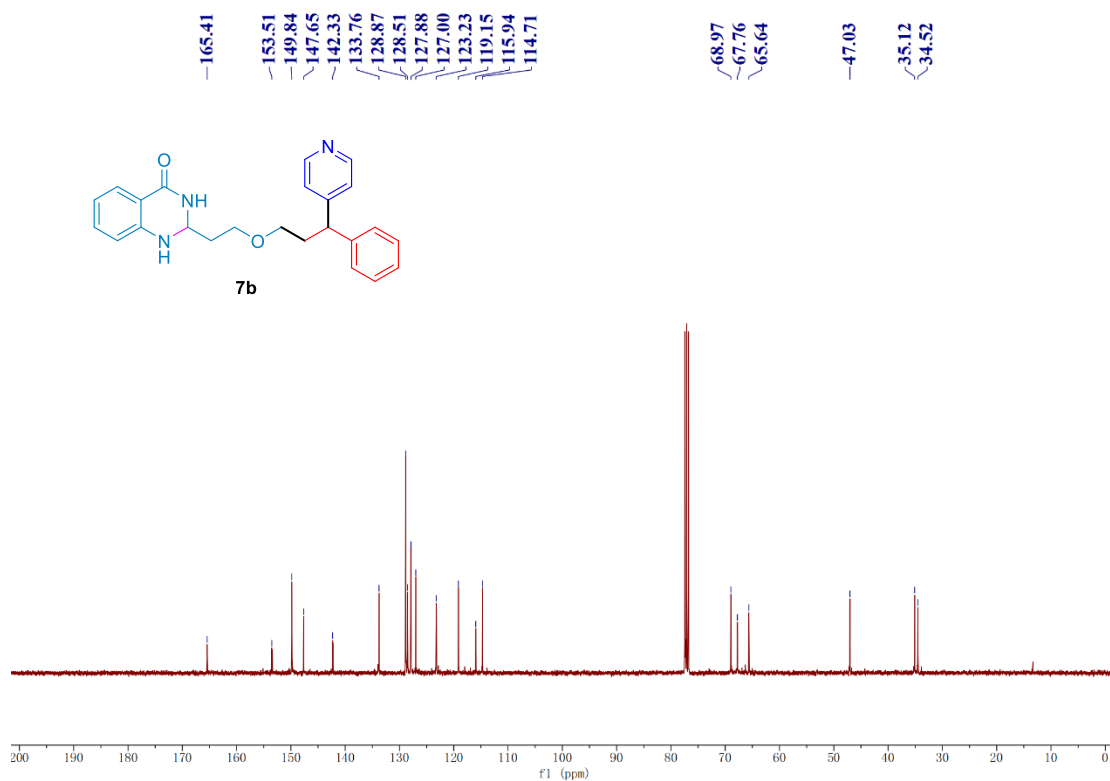

$^1\text{H}$  NMR (400 MHz,  $\text{CDCl}_3$ ) and  $^{13}\text{C}$  NMR (100 MHz,  $\text{CDCl}_3$ ) spectra of product **4a'**

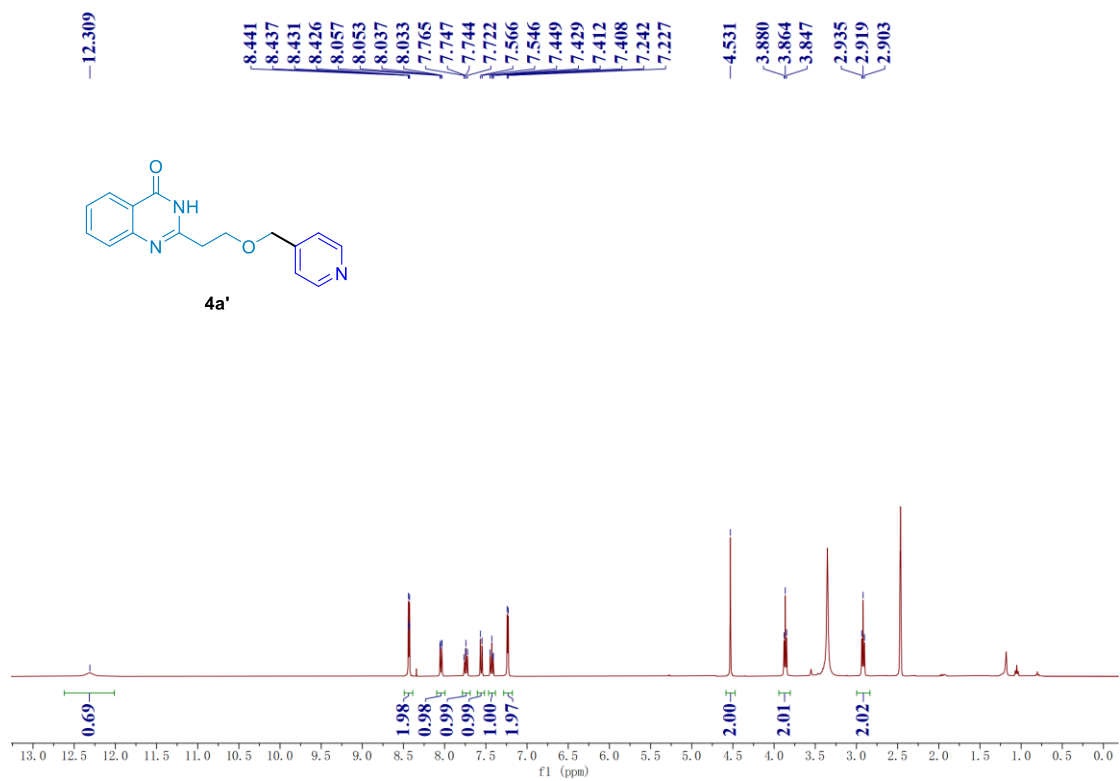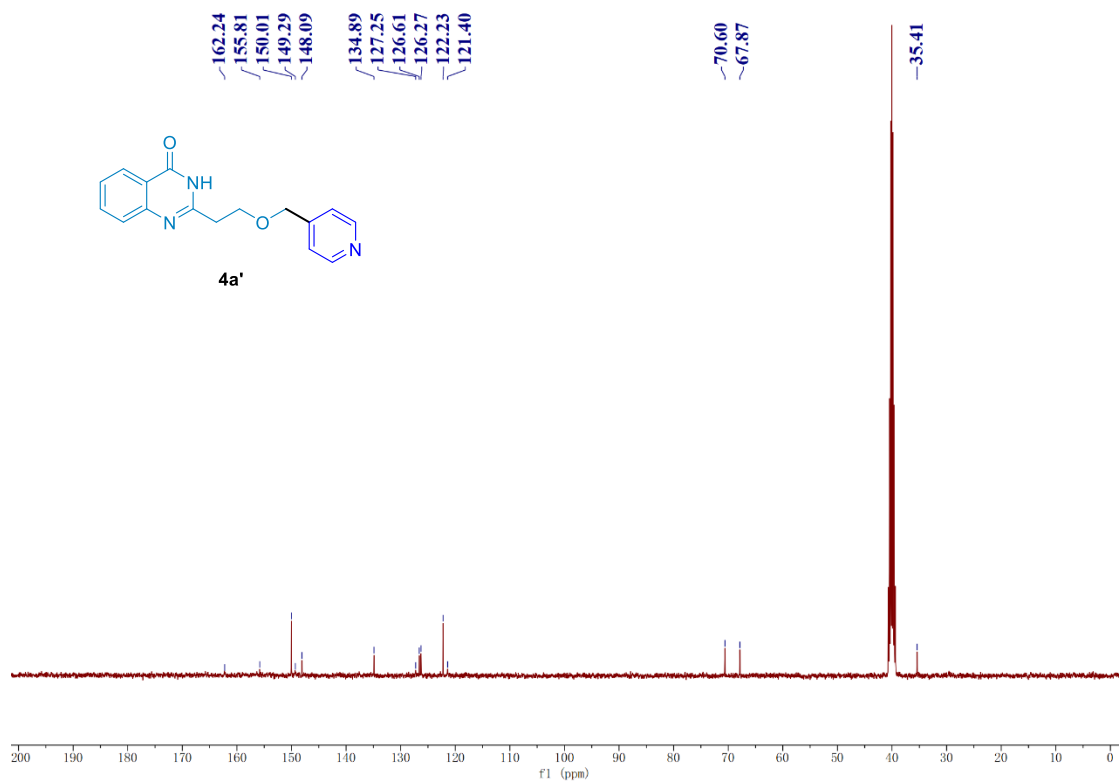

$^1\text{H}$  NMR (400 MHz,  $\text{CDCl}_3$ ) and  $^{13}\text{C}$  NMR (100 MHz,  $\text{CDCl}_3$ ) spectra of product **8a**

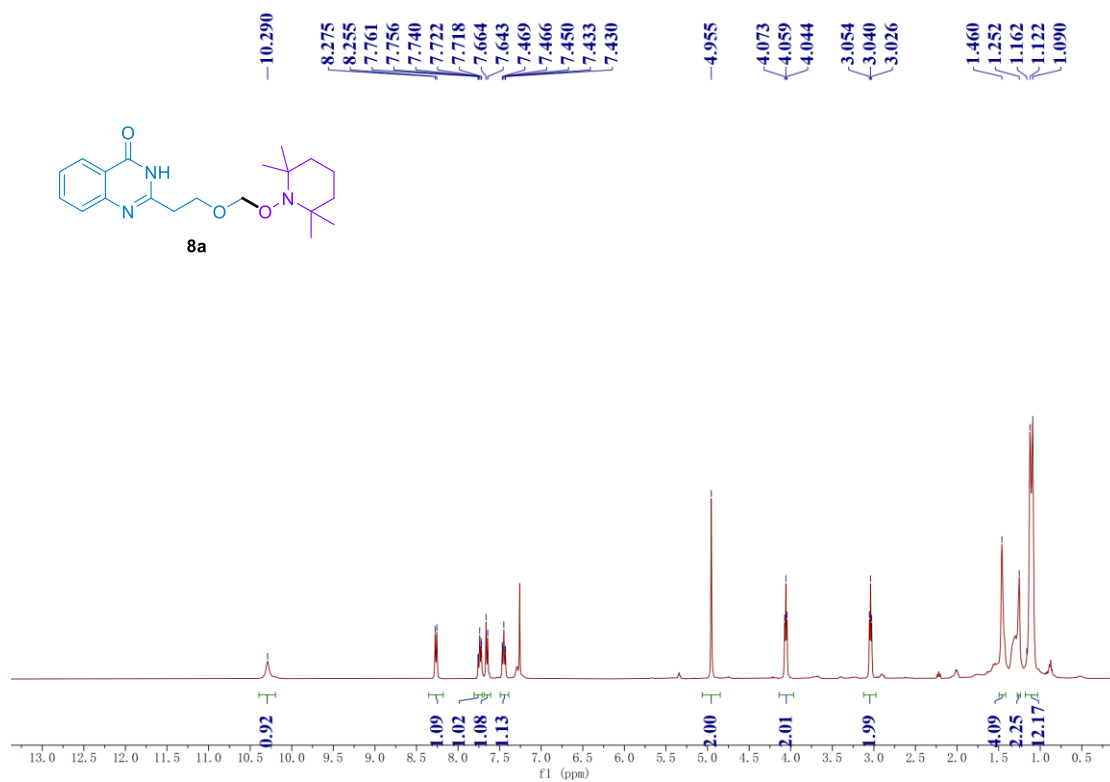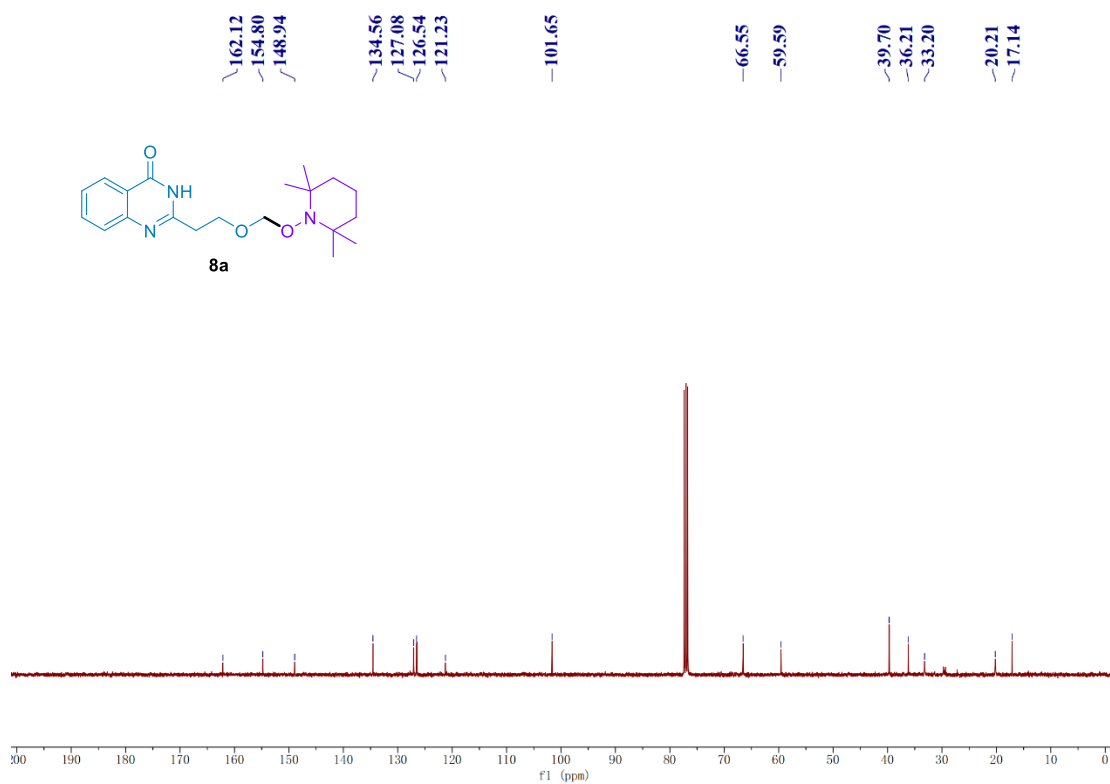

$^1\text{H}$  NMR (400 MHz,  $\text{CDCl}_3$ ) and  $^{13}\text{C}$  NMR (100 MHz,  $\text{CDCl}_3$ ) spectra of product **9a**

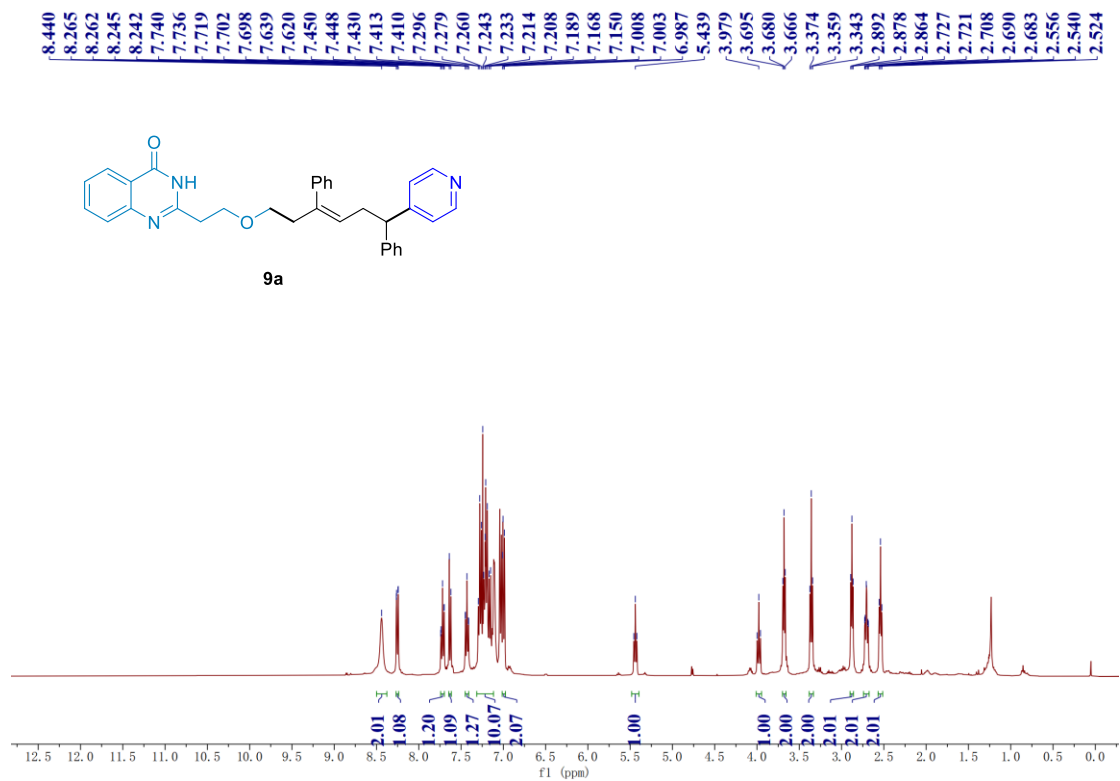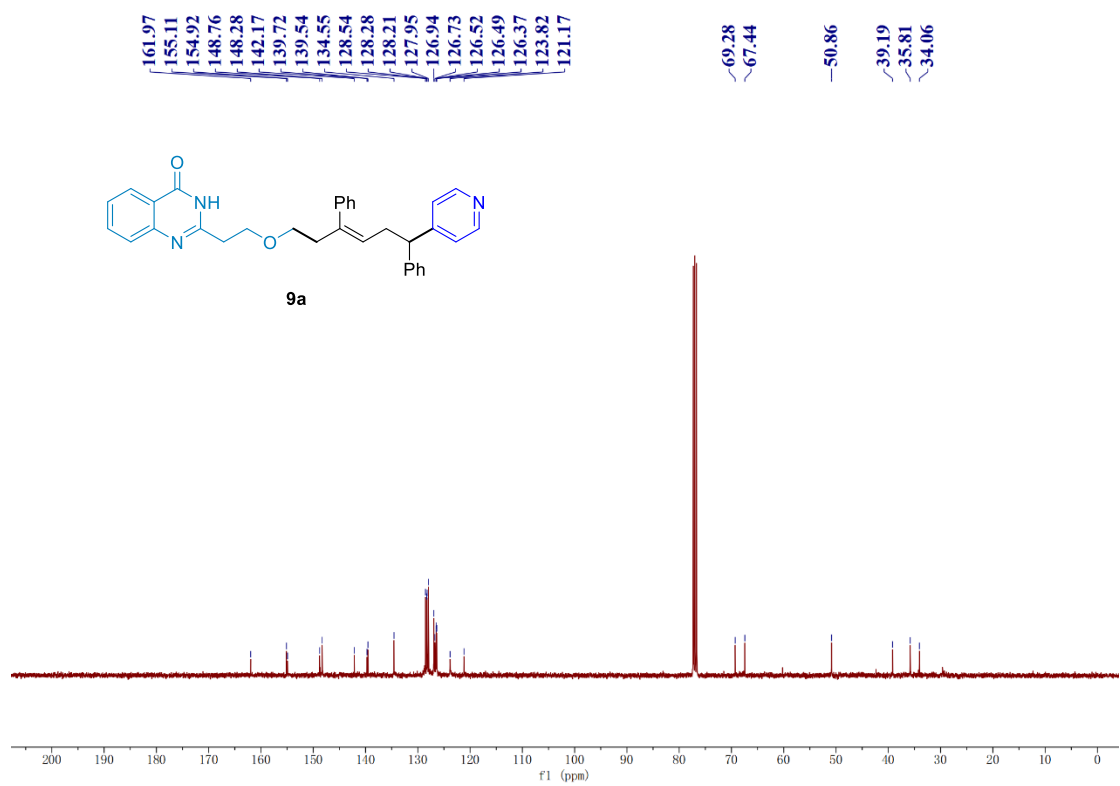

Supplement: d5cc06894k1.pdf [file d5cc06894k1.pdf]
